# Supplementary material
Source: publisher figshare collection journal article supplement (https://acs.figshare.com/ndownloader/files/4303177)

# **Pd-Catalyzed Intermolecular C–H Amination with Alkylamines**

Eun Jeong Yoo, Sandy Ma, Tian-Sheng Mei, Kelvin S. L. Chan, Jin-Quan Yu\*

*Department of Chemistry, The Scripps Research Institute, 10550 N. Torrey Pines Road, La Jolla, California 92037, USA.*

## **SUPPORTING INFORMATION**

### **Table of Contents**

|                                                              |       |             |
|--------------------------------------------------------------|-------|-------------|
| General Information.....                                     | page  | S-2         |
| Experimental Procedures.....                                 | pages | S-2 – S-11  |
| Preparation of <i>N</i> -Aryl Benzamide Substrates.....      | pages | S-2         |
| Characterization of <i>N</i> -Aryl Benzamide Substrates..... | pages | S-2 – S-4   |
| Optimization Studies.....                                    | page  | S-5 – S-7   |
| General Procedure for Amination.....                         | page  | S-7         |
| Characterization of Amination Products.....                  | pages | S-8 – S-11  |
| Hydrolysis of aminated product to carboxylic acid .....      | page  | S-12        |
| Complete Ref. 8b.....                                        | pages | S-12        |
| NMR Spectra.....                                             | pages | S-13 – S-44 |

**General Information:** Solvents were obtained from Sigma-Aldrich, Alfa-Aesar and Acros and used directly without further purification. Carboxylic acids or carboxylic acid chlorides and 2,3,5,6-tetrafluoro-4-(trifluoromethyl)aniline were obtained from the commercial sources and used to prepare the corresponding amides. Analytical thin layer chromatography was performed on 0.25 mm silica gel 60-F254. Visualization was carried out with UV light and Vogel's permanganate.  $^1\text{H}$  NMR spectra were recorded on Varian Inova instrument (400 MHz) and Bruker DRX (500 MHz). Chemical shifts were quoted in parts per million (ppm) referenced to the residual undeuterated solvent peak or 0.0 ppm for tetramethylsilane. The following abbreviations (or combinations thereof) were used to explain multiplicities: s = singlet, d = doublet, t = triplet, q = quartet, m = multiplet. Coupling constants,  $J$ , were reported in Hertz unit (Mz).  $^{13}\text{C}$  NMR spectra were recorded on Varian Inova instrument (100 MHz) and Bruker DRX (125 MHz) and were fully decoupled by broad band proton decoupling. Chemical shifts were reported in ppm referenced to the center line of a triplet at 77.0 ppm of chloroform- $d$ . The carbons of the fluorinated aryl rings of the benzamide were omitted because these  $^{13}\text{C}$  NMR were very small due to coupling with the F's. High-resolution mass spectra (HRMS) were recorded on an Agilent Mass spectrometer using ESI-TOF (electrospray ionization-time of flight). IR spectra were recorded on a Perkin Elmer Spectrum BX FTIR spectrometer. Frequencies were given in reciprocal centimeters ( $\text{cm}^{-1}$ ) and only selected absorbances were reported.

The  $^{13}\text{C}$  NMR signals of the 2,3,5,6-tetrafluoro-4-(trifluoromethyl) aryl groups in the directing groups are weak due to the multiple coupling from the fluorines. For full characterizations see the spectra of the carboxylic acid **4** obtained from the hydrolysis of the amination product **3a**.

## Experimental Procedure

### Preparation of *N*-Aryl Benzamide Substrates

General procedure for preparation of *N*-aryl benzamide derivatives: An acid chloride (10.0 mmol), prepared from the corresponding carboxylic acid and oxalyl chloride, was added to a vigorously stirring solution of 2,3,5,6-tetrafluoro-4-(trifluoromethyl)aniline (11.0 mmol) in toluene (50 mL). The reaction mixture was stirred for 12 h under reflux, and then stirred at room temperature for 4 h. The product mixture was concentrated *in vacuo* and was recrystallized from ethyl acetate/hexane to give the amide.

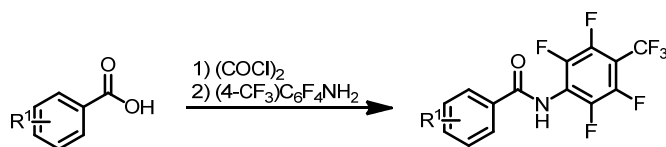

**Scheme S1.** General procedure for preparation of *N*-aryl benzamide derivatives

## Characterization of *N*-Aryl Benzamide Substrates

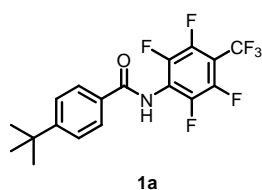

**1a** (ESI-TOF)  $m/z$  Calcd for  $C_{18}H_{14}F_7NO$   $[M+H]^+$  394.1036, found 394.1051.

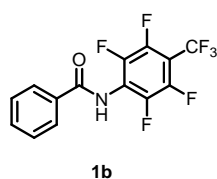

**1b**

**(4-(tert-butyl)-N-(2,3,5,6-tetrafluoro-4-(trifluoromethyl)phenyl)benzamide (1a):** white solid.  $^1H$  NMR (400 MHz,  $CDCl_3$ )  $\delta$  7.84 (d,  $J$  = 8.3 Hz, 2 H), 7.66 (s, 1H), 7.51 (d,  $J$  = 8.3 Hz, 2H), 1.34 (s, 9H);  $^{13}C$  NMR (100 MHz,  $CDCl_3$ )  $\delta$  164.96, 157.36, 129.31, 127.97, 126.24, 35.40, 31.29; IR (neat)  $\nu$  3249, 2970, 1673, 1653, 1507, 1467, 1339, 1276, 1261, 1233, 1147, 997, 904, 875, 850  $cm^{-1}$ ; HRMS

**N-(2,3,5,6-tetrafluoro-4-(trifluoromethyl)phenyl)benzamide (1b):** white solid.  $^1H$  NMR (400 MHz,  $(CD_3)_2SO$ )  $\delta$  10.92 (s, 1H), 8.01 (t,  $J$  = 8.0 Hz, 2H), 7.69–7.65 (m, 1H), 7.58 (t,  $J$  = 8.0 Hz, 2H);  $^{13}C$  NMR (100 MHz,  $(CD_3)_2SO$ )  $\delta$  165.14, 132.80, 132.12, 128.70, 128.21; IR (neat)  $\nu$  3711, 2319, 1468, 1055, 1033, 997, 897  $cm^{-1}$ ; HRMS (ESI-TOF)  $m/z$  Calcd for  $C_{14}H_6F_7NO$   $[M+H]^+$  338.0410, found 338.0423.

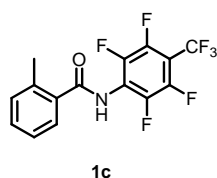

**1c**

**2-methyl-N-(2,3,5,6-tetrafluoro-4-(trifluoromethyl)phenyl)benzamide (1c):** white solid.  $^1H$  NMR (400 MHz,  $(CD_3)_2SO$ )  $\delta$  10.94 (s, 1H), 7.54 (d,  $J$  = 8.0 Hz, 1H), 7.48–7.44 (m, 1H), 7.37–7.33 (m, 2H), 2.42 (s, 3H);  $^{13}C$  NMR (100 MHz,  $(CD_3)_2SO$ )  $\delta$  167.40, 136.20, 134.47, 130.88, 127.74, 125.82, 104.36, 19.40; IR (neat)  $\nu$  3706, 3234, 2318, 1685, 1469, 1142, 1054, 1033, 1002, 993  $cm^{-1}$ ; HRMS (ESI-TOF)  $m/z$  Calcd for  $C_{15}H_8F_7NO$   $[M+H]^+$

352.0567, found 352.0581.

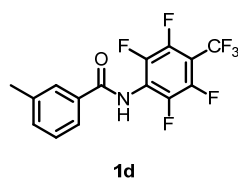

**1d**

**3-methyl-N-(2,3,5,6-tetrafluoro-4-(trifluoromethyl)phenyl)benzamide (1d):** white solid.  $^1H$  NMR (400 MHz,  $(CD_3)_2SO$ )  $\delta$  10.87 (s, 1H), 7.84–7.80 (m, 2H), 7.50–7.44 (m, 2H), 2.41 (s, 3H);  $^{13}C$  NMR (100 MHz,  $(CD_3)_2SO$ )  $\delta$  165.21, 138.14, 133.36, 132.09, 128.66, 128.60, 125.35, 20.88; IR (neat)  $\nu$  3310, 1650, 1455, 1327, 1189, 995  $cm^{-1}$ ; HRMS (ESI-TOF)  $m/z$  Calcd for  $C_{15}H_8F_7NO$   $[M+H]^+$  352.0567, found 352.0584.

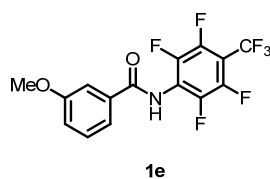

**1e**

$m/z$  Calcd for  $C_{15}H_8F_7NO_2$   $[M+H]^+$  368.0516, found 368.0530.

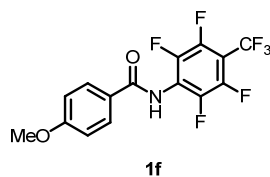

**1f**

**4-methoxy-N-(2,3,5,6-tetrafluoro-4-(trifluoromethyl)phenyl)benzamide (1f):** white solid.  $^1H$  NMR (400 MHz,  $(CD_3)_2SO$ )  $\delta$  10.73 (s, 1H), 8.00 (d,  $J$  = 8.8 Hz, 2H), 7.11 (d,  $J$  = 8.8 Hz, 2H), 3.86 (s, 3H);  $^{13}C$  NMR (100 MHz,  $(CD_3)_2SO$ )  $\delta$  164.43, 162.79, 130.31, 124.15, 113.95, 55.57; IR (neat)  $\nu$  3706, 2707, 2318, 1469, 1055, 1033, 1012, 897  $cm^{-1}$ ; HRMS (ESI-TOF)  $m/z$  Calcd for  $C_{15}H_8F_7NO_2$   $[M+H]^+$  368.0516, found 368.0528.

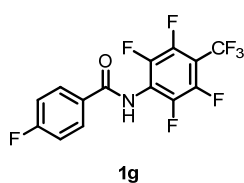

**4-fluoro-*N*-(2,3,5,6-tetrafluoro-4-(trifluoromethyl)phenyl)benzamide (1g):** white solid.  $^1\text{H}$  NMR (400 MHz,  $(\text{CD}_3)_2\text{SO}$ )  $\delta$  10.98 (s, 1H), 8.10 (dd,  $J_1 = 8.7$  Hz,  $J_2 = 5.5$  Hz, 2H), 7.42 (t,  $J = 8.8$  Hz, 2H);  $^{13}\text{C}$  NMR (100 MHz,  $(\text{CD}_3)_2\text{SO}$ )  $\delta$  164.12 (d,  $J_{\text{C-F}} = 250.3$  Hz), 164.06, 131.12 (d,  $J_{\text{C-F}} = 9.0$  Hz), 128.58 (d,  $J_{\text{C-F}} = 3.0$  Hz), 115.80 (d,  $J_{\text{C-F}} = 22.1$  Hz); IR (neat)  $\nu$  3249, 1681, 1604, 1508, 1467, 1343, 1237, 1191, 1152, 997, 906, 854  $\text{cm}^{-1}$ ; HRMS (ESI-TOF)  $m/z$  Calcd for  $\text{C}_{14}\text{H}_5\text{F}_8\text{NO}$   $[\text{M}+\text{H}]^+$  356.0316, found 356.0332.

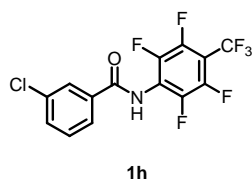

**3-chloro-*N*-(2,3,5,6-tetrafluoro-4-(trifluoromethyl)phenyl)benzamide (1h):** white solid.  $^1\text{H}$  NMR (400 MHz,  $(\text{CD}_3)_2\text{SO}$ )  $\delta$  11.06 (s, 1H), 8.05 (d,  $J = 1.6$  Hz, 1H), 7.97 (d,  $J = 7.8$  Hz, 1H), 7.74 (dd,  $J_1 = 8.0$  Hz,  $J_2 = 1.0$  Hz, 1H), 7.61 (t,  $J = 7.9$  Hz, 1H);  $^{13}\text{C}$  NMR (100 MHz,  $(\text{CD}_3)_2\text{SO}$ )  $\delta$  163.78, 134.02, 133.52, 132.62, 130.74, 127.95, 126.99; IR (neat)  $\nu$  3216, 3131, 1673, 1655, 1531, 1509, 1482, 1470, 1336, 1158, 1150, 996, 923, 878  $\text{cm}^{-1}$ ; HRMS (ESI-TOF)  $m/z$  Calcd for  $\text{C}_{14}\text{H}_5\text{ClF}_7\text{NO}$   $[\text{M}+\text{H}]^+$  372.0021, found 372.0029.

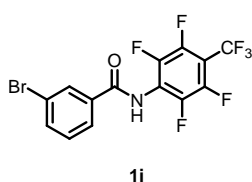

**3-bromo-*N*-(2,3,5,6-tetrafluoro-4-(trifluoromethyl)phenyl)benzamide (1i):** white solid.  $^1\text{H}$  NMR (400 MHz,  $(\text{CD}_3)_2\text{SO}$ )  $\delta$  11.06 (s, 1H), 8.19 (s, 1H), 8.00 (d,  $J = 7.9$  Hz, 1H), 7.87 (d,  $J = 8.0$  Hz, 1H), 7.54 (t,  $J = 7.9$  Hz, 1H);  $^{13}\text{C}$  NMR (100 MHz,  $(\text{CD}_3)_2\text{SO}$ )  $\delta$  163.69, 135.52, 134.20, 130.97, 130.80, 127.37, 121.90; IR (neat)  $\nu$  3712, 2319, 1467, 1055, 1033, 996, 897  $\text{cm}^{-1}$ ; HRMS (ESI-TOF)  $m/z$  Calcd for  $\text{C}_{14}\text{H}_5\text{SF}_7\text{NO}$   $[\text{M}+\text{H}]^+$  415.9515, found 415.9535.

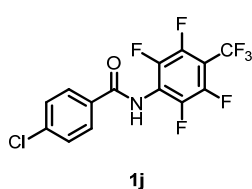

**4-chloro-*N*-(2,3,5,6-tetrafluoro-4-(trifluoromethyl)phenyl)benzamide (1j):** white solid.  $^1\text{H}$  NMR (400 MHz,  $(\text{CD}_3)_2\text{SO}$ )  $\delta$  11.05 (s, 1H), 8.03 (d,  $J = 8.5$  Hz, 2H), 7.66 (d,  $J = 8.5$  Hz, 2H);  $^{13}\text{C}$  NMR (100 MHz,  $(\text{CD}_3)_2\text{SO}$ )  $\delta$  164.16, 137.70, 130.84, 130.12, 128.83; IR (neat)  $\nu$  3709, 2707, 2319, 1462, 1054, 1033, 1013, 897  $\text{cm}^{-1}$ ; HRMS (ESI-TOF)  $m/z$  Calcd for  $\text{C}_{14}\text{H}_5\text{ClF}_7\text{NO}$   $[\text{M}+\text{H}]^+$  372.0021, found 372.0039.

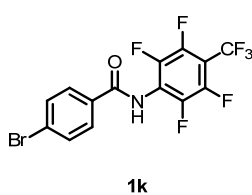

**3-bromo-*N*-(2,3,5,6-tetrafluoro-4-(trifluoromethyl)phenyl)benzamide (1k):** white solid.  $^1\text{H}$  NMR (400 MHz,  $(\text{CD}_3)_2\text{SO}$ )  $\delta$  11.01 (s, 1H), 8.02–7.89 (m, 2H), 7.80 (d,  $J = 8.6$  Hz, 2H);  $^{13}\text{C}$  NMR (100 MHz,  $(\text{CD}_3)_2\text{SO}$ )  $\delta$  164.32, 131.82, 131.20, 130.27, 126.77; IR (neat)  $\nu$  3750, 3250, 2989, 2707, 2318, 1679, 1468, 997, 897  $\text{cm}^{-1}$ ; HRMS (ESI-TOF)  $m/z$  Calcd for  $\text{C}_{14}\text{H}_5\text{SF}_7\text{NO}$   $[\text{M}+\text{H}]^+$  415.9515, found 415.9533.

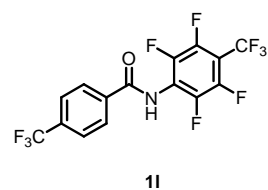

***N*-(2,3,5,6-tetrafluoro-4-(trifluoromethyl)phenyl)-4-(trifluoromethyl)benzamide (1l):** white solid.  $^1\text{H}$  NMR (400 MHz,  $(\text{CD}_3)_2\text{SO}$ )  $\delta$  11.20 (s, 1H), 8.20 (d,  $J = 8.1$  Hz, 2H), 7.96 (d,  $J = 8.2$  Hz, 2H);  $^{13}\text{C}$  NMR (100 MHz,  $(\text{CD}_3)_2\text{SO}$ )  $\delta$  164.13, 135.88, 132.49 (q,  $J_{\text{C-F}} = 31.6$  Hz), 129.18, 125.74 (q,  $J_{\text{C-F}} = 3.6$  Hz), 123.81 (q,  $J_{\text{C-F}} = 271.3$  Hz); IR (neat)  $\nu$  3714, 3250, 2319, 1683, 1472, 1327, 1172, 1132, 999  $\text{cm}^{-1}$ ; HRMS (ESI-TOF)  $m/z$  Calcd for  $\text{C}_{15}\text{H}_5\text{F}_{10}\text{NO}$   $[\text{M}+\text{H}]^+$  406.0284, found 406.0291.



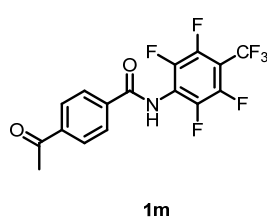

**4-acetyl-N-(2,3,5,6-tetrafluoro-4-(trifluoromethyl)phenyl)benzamide (1m):** white solid.  $^1\text{H}$  NMR (400 MHz,  $(\text{CD}_3)_2\text{SO}$ )  $\delta$  10.98 (s, 1H), 7.97 (s, 4H), 2.65 (s, 3H);  $^{13}\text{C}$  NMR (100 MHz,  $(\text{CD}_3)_2\text{SO}$ )  $\delta$  197.70, 164.48, 139.72, 135.75, 128.57, 128.44, 27.06; IR (neat)  $\nu$  3750, 2692, 1474, 1055, 1002, 897  $\text{cm}^{-1}$ ; HRMS (ESI-TOF)  $m/z$  Calcd for  $\text{C}_{16}\text{H}_8\text{F}_7\text{NO}_2$   $[\text{M}+\text{H}]^+$  380.0516, found 380.5021.

### Optimization Studies

Experimental procedure for the optimization of Pd catalysts (Table S1): A 50 mL Schlenk-type sealed tube (with a Teflon high pressure valve and side arm) equipped with a magnetic stir bar was charged with the amide substrate (**1a**, 0.1 mmol), *O*-benzoyl hydroxymorpholine (0.2 mmol),  $\text{Pd}(\text{OAc})_2$  (10 mol %), ligand (20 mol %), CsF (0.2 mmol), and solvent (1.0 mL). The reaction tube was capped, evacuated briefly under high vacuum and then charged with  $\text{N}_2$  (1 atm, balloon) ( $\times 3$ ). The reaction mixture was stirred at 130  $^\circ\text{C}$  for 18 h. Upon completion, the reaction mixture was cooled to room temperature. The reaction mixture was diluted with ethyl acetate and then filtered through a small pad of Celite. The filtrate was concentrate *in vacuo*. The NMR yield of desired product **3a** was determined by integration using an internal standard (dibromomethane).

**Table S1.** Optimization of Pd catalyst for intermolecular amination reaction<sup>a</sup>

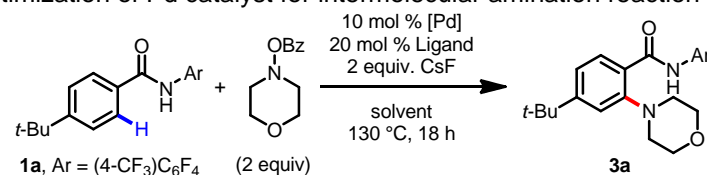

| Entry | [Pd]                      | Ligand                          | Solvent            | Yield (%) <sup>b</sup> |
|-------|---------------------------|---------------------------------|--------------------|------------------------|
| 1     | $\text{Pd}(\text{OAc})_2$ | $\text{PCy}_3\cdot\text{HBF}_4$ | toluene            | <2                     |
| 2     | $\text{Pd}(\text{OAc})_2$ | Cy-JohnPhos- $\text{HBF}_4$     | toluene            | 26                     |
| 3     | $\text{Pd}(\text{OAc})_2$ | SPhos- $\text{HBF}_4$           | toluene            | 15                     |
| 4     | $\text{Pd}(\text{dba})_2$ | ---                             | toluene            | 59                     |
| 5     | $\text{Pd}(\text{dba})_2$ | ---                             | 1,2-dichloroethane | 70                     |
| 6     | $\text{Pd}(\text{OAc})_2$ | ---                             | toluene            | 62                     |
| 7     | $\text{Pd}(\text{OAc})_2$ | ---                             | 1,2-dichloroethane | 74                     |

<sup>a</sup> Reaction conditions: **1a** (0.1 mmol), *O*-benzoyl hydroxymorpholine (2.0 equiv),  $\text{Pd}(\text{OAc})_2$  (10 mol %), CsF (2.0 equiv), ligand (20 mol %), solvent (1 mL), 130  $^\circ\text{C}$ , 18 h.

<sup>b</sup> The yield was determined by  $^1\text{H}$  NMR analysis of the crude product using dibromomethane as an internal standard.

Experimental procedure for the optimization of general reaction conditions (Table S2): A 50 mL Schlenk-type sealed tube (with a Teflon high pressure valve and side arm) equipped with a magnetic stir bar was charged with the amide substrate (**1a**, 0.1 mmol), *O*-benzoyl hydroxymorpholine (0.2 mmol), Pd(OAc)<sub>2</sub> (10 mol %), additive (0.1 mmol), base (0.2 mmol), and solvent (1.0 mL). The reaction tube was capped, evacuated briefly under high vacuum and then charged with N<sub>2</sub> (1 atm, balloon) (×3). The reaction mixture was stirred at 130 °C for 18 h. Upon completion, the reaction mixture was cooled to room temperature. The reaction mixture was diluted with ethyl acetate and then filtered through a small pad of Celite. The filtrate was concentrate *in vacuo*. The NMR yield of desired product **3a** was determined by integration using an internal standard (dibromomethane).

**Table S2.** Optimization of Pd(II)-catalyzed intermolecular amination reaction <sup>a</sup>

**1a**, Ar = (4-CF<sub>3</sub>)C<sub>6</sub>F<sub>4</sub> (2 equiv)      **3a**

| Entry | Base | Additive                        | Solvent            | Yield (%) <sup>b</sup> |
|-------|------|---------------------------------|--------------------|------------------------|
| 1     | —    | —                               | 1,4-dioxane        | 40                     |
| 2     | CsF  | —                               | 1,4-dioxane        | 57                     |
| 3     | CsF  | —                               | toluene            | 62                     |
| 4     | CsF  | PhI(OAc) <sub>2</sub>           | toluene            | 29                     |
| 5     | CsF  | AgOAc                           | toluene            | 72                     |
| 6     | CsF  | AgOAc                           | 1,2-dichloroethane | 96                     |
| 7     | CsF  | NaOAc                           | 1,2-dichloroethane | 78                     |
| 8     | CsF  | KOAc                            | 1,2-dichloroethane | 69                     |
| 9     | CsF  | Cu(OAc) <sub>2</sub>            | 1,2-dichloroethane | 56                     |
| 10    | CsF  | Ag <sub>2</sub> CO <sub>3</sub> | 1,2-dichloroethane | 97                     |
| 11    | CsF  | AcOH <sup>c</sup>               | 1,2-dichloroethane | 0                      |

<sup>a</sup> Reaction conditions: **1a** (0.1 mmol), *O*-benzoyl hydroxymorpholine (2.0 equiv), Pd(OAc)<sub>2</sub> (10 mol %), base (2.0 equiv), additive (1.0 equiv), solvent (1 mL), 130 °C, 18 h. <sup>b</sup> The yield was determined by <sup>1</sup>H NMR analysis of the crude product using dibromomethane as an internal standard. <sup>c</sup> 20 mol % AcOH was used.

Experimental procedure for the optimization of general reaction condition (Table S3): A 50 mL Schlenk-type sealed tube (with a Teflon high pressure valve and side arm) equipped with a magnetic stir bar was charged with the amide substrate (**1a**, 0.1 mmol), *O*-benzoyl hydroxymorpholine (0.2 mmol), Pd(OAc)<sub>2</sub> (10 mol %), AgOAc (0.1 mmol), base (0.2 mmol), and DCE (1.0 mL). The reaction tube was capped, evacuated briefly under high vacuum and then

charged with N<sub>2</sub> (1 atm, balloon) (×3). The reaction mixture was stirred at 130 °C for 18 h. Upon completion, the reaction mixture was cooled to room temperature. The reaction mixture was diluted with ethyl acetate and then filtered through a small pad of Celite. The filtrate was concentrate *in vacuo*. The NMR yield of desired product **3a** was determined by integration using an internal standard (dibromomethane).

**Table S2.** Base screening for Pd(II)-catalyzed intermolecular amination reaction <sup>a</sup>

1a, Ar = (4-CF<sub>3</sub>)C<sub>6</sub>F<sub>4</sub> (2 equiv)      10 mol % Pd(OAc)<sub>2</sub>, 1 equiv AgOAc, 2 equiv. base, DCE, 130 °C, 18 h      3a

| Entry | Base                            | Yield (%) <sup>b</sup> | Entry | Base                             | Yield (%) <sup>b</sup> |
|-------|---------------------------------|------------------------|-------|----------------------------------|------------------------|
| 1     | CsF                             | 96                     | 6     | KF                               | 88                     |
| 2     | Cs <sub>2</sub> CO <sub>3</sub> | <2                     | 7     | Na <sub>2</sub> HPO <sub>4</sub> | 39                     |
| 3     | NaOAc                           | 53                     | 8     | NaH <sub>2</sub> PO <sub>4</sub> | 56                     |
| 4     | KOAc                            | 42                     | 9     | K <sub>2</sub> HPO <sub>4</sub>  | 80                     |
| 5     | Na <sub>2</sub> CO <sub>3</sub> | 78                     | 10    | KH <sub>2</sub> PO <sub>4</sub>  | 58                     |

<sup>a</sup> Reaction conditions: **1a** (0.1 mmol), *O*-benzoyl hydroxymorpholine (2.0 equiv), Pd(OAc)<sub>2</sub> (10 mol %), base (2.0 equiv), AgOAc (1.0 equiv), DCE (1 mL), 130 °C, 18 h. <sup>b</sup> The yield was determined by <sup>1</sup>H NMR analysis of the crude product using dibromomethane as an internal standard.

### General Procedure for Amination

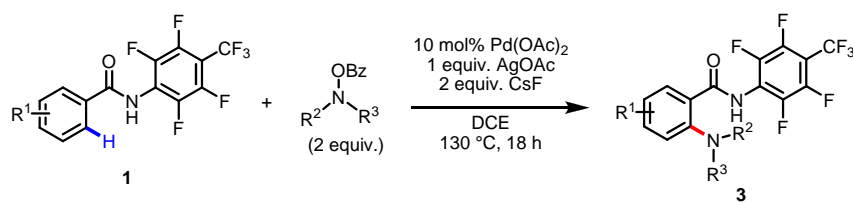

**Scheme S2.** General procedure for Pd(II)-catalyzed intermolecular amination

General procedure for Pd(II)-catalyzed amination reaction: A 50 mL Schlenk-type sealed tube (with a Teflon high pressure valve and side arm) equipped with a magnetic stir bar was charged with the amide substrate (**1**, 0.2 mmol), *O*-benzoyl hydroxylamine (82.9 mg, 0.4 mmol), Pd(OAc)<sub>2</sub> (4.5 mg, 10 mol %), AgOAc (33.4 mg, 0.2 mmol), CsF (60.7 mg, 0.4 mmol), and DCE (1.0 mL). The reaction tube was capped, evacuated briefly under high vacuum and then charged with N<sub>2</sub> (1 atm, balloon) (×3). The reaction mixture was stirred at 130 °C for 18 h. Upon completion, the reaction mixture was cooled to room temperature. The reaction mixture was

diluted with ethyl acetate and then filtered through a small pad of Celite. The filtrate was concentrate *in vacuo*. The resulting residue was purified by silica gel flash column chromatography using hexanes/EtOAc as the eluent.

### Characterization of Amination Products:

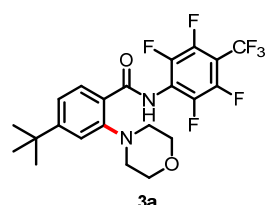**4-(tert-butyl)-2-morpholino-N-(2,3,5,6-tetrafluoro-4-(trifluoromethyl)phenyl)benzamide (3a):** white solid (91.8 mg, 96% yield).  $^1\text{H}$  NMR (400 MHz,  $\text{CDCl}_3$ )  $\delta$  8.27 (d,  $J = 8.0$  Hz, 1H), 7.43–7.40 (m, 2H), 3.89 (t,  $J = 4.0$  Hz, 4H), 3.09 (t,  $J = 4.0$  Hz, 1H), 1.34 (s, 9H);  $^{13}\text{C}$  NMR (100 MHz,  $\text{CDCl}_3$ )  $\delta$  163.51, 158.13, 150.90, 146.09 (m), 143.43 (m), 140.95 (m), 132.12, 124.24, 123.79, 121.60 (m), 121.13 (q,  $J_{\text{C-F}} = 273$  Hz) 67.41, 53.97, 35.57, 31.22; IR (neat)  $\nu$  2988, 1705, 1655, 1473, 1335, 1283, 1222, 1142, 979  $\text{cm}^{-1}$ ; HRMS (ESI-TOF)  $m/z$  Calcd for  $\text{C}_{22}\text{H}_{21}\text{F}_7\text{N}_2\text{O}_2$   $[\text{M}+\text{H}]^+$  479.1564, found 479.1573.

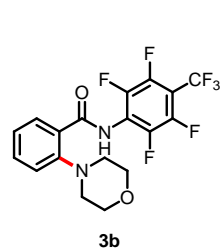**2-morpholino-N-(2,3,5,6-tetrafluoro-4-(trifluoromethyl)phenyl)benzamide (3b):** white solid (71.7 mg, 85% yield).  $^1\text{H}$  NMR (400 MHz,  $\text{CDCl}_3$ )  $\delta$  13.09 (s, 1H), 8.34–8.32 (m, 1H), 7.62–7.58 (m, 1H), 7.45–7.36 (m, 2H), 3.88 (t,  $J = 4.3$  Hz, 4H), 3.08 (t,  $J = 4.4$  Hz, 4H);  $^{13}\text{C}$  NMR (100 MHz,  $\text{CDCl}_3$ )  $\delta$  163.58, 151.13, 134.08, 132.44, 126.98, 126.62, 122.88, 67.36, 54.00; IR (neat)  $\nu$  2924, 2854, 1691, 1655, 1505, 1474, 1459, 1336, 1235, 1143, 1116, 997, 918  $\text{cm}^{-1}$ ; HRMS (ESI-TOF)  $m/z$  Calcd for  $\text{C}_{18}\text{H}_{13}\text{F}_7\text{N}_2\text{O}_2$   $[\text{M}+\text{H}]^+$  423.0938, found 423.0950.

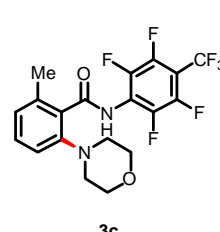**2-methyl-6-morpholino-N-(2,3,5,6-tetrafluoro-4-(trifluoromethyl)phenyl)benzamide (3c):** white solid (77.6 mg, 89% yield).  $^1\text{H}$  NMR (400 MHz,  $\text{CDCl}_3$ )  $\delta$  8.86 (s, 1H), 7.33 (t,  $J = 7.9$  Hz, 1H), 7.06–7.03 (m, 2H), 3.08 (m, 4H), 3.00 (m, 4H), 2.45 (s, 3H);  $^{13}\text{C}$  NMR (100 MHz,  $\text{CDCl}_3$ )  $\delta$  166.96, 150.29, 139.12, 131.29, 130.05, 127.38, 117.41, 67.15, 53.78, 20.62; IR (neat)  $\nu$  3244, 1740, 1681, 1472, 1145, 998  $\text{cm}^{-1}$ ; HRMS (ESI-TOF)  $m/z$  Calcd for  $\text{C}_{19}\text{H}_{15}\text{F}_7\text{N}_2\text{O}_2$   $[\text{M}+\text{H}]^+$  437.1094, found 437.1113.

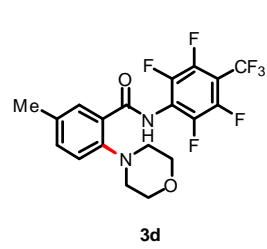**5-methyl-2-morpholino-N-(2,3,5,6-tetrafluoro-4-(trifluoromethyl)phenyl)benzamide (3d):** white solid (71.6 mg, 82% yield).  $^1\text{H}$  NMR (400 MHz,  $\text{CDCl}_3$ )  $\delta$  13.28 (s, 1H), 8.15 (s, 1H), 7.40 (t,  $J = 8.2$  Hz, 1H), 7.33 (t,  $J = 8.2$  Hz, 1H), 3.87 (m, 4H), 3.05 (m, 4H), 2.32 (s, 3H);  $^{13}\text{C}$  NMR (100 MHz,  $\text{CDCl}_3$ )  $\delta$  163.74, 148.60, 137.08, 134.70, 132.65, 126.20, 122.94, 67.42, 54.05, 21.06; IR (neat)  $\nu$  3750, 2847, 1737, 1692, 1655, 1506, 1476, 1459, 1336, 1236, 1144, 1116, 998  $\text{cm}^{-1}$ ; HRMS (ESI-TOF)  $m/z$  Calcd for  $\text{C}_{19}\text{H}_{15}\text{F}_7\text{N}_2\text{O}_2$   $[\text{M}+\text{H}]^+$  437.1094, found 437.1108.

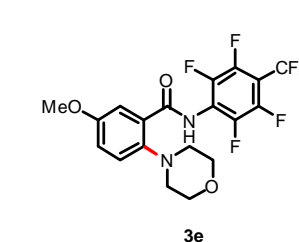**5-methoxy-2-morpholino-N-(2,3,5,6-tetrafluoro-4-(trifluoromethyl)phenyl)benzamide (3e):** yellow foam (71.4 mg, 79% yield).  $^1\text{H}$  NMR (400 MHz,  $\text{CDCl}_3$ )  $\delta$  13.66 (s, 1H), 7.88 (d,  $J = 3.1$

Hz, 1H), 7.40 (d,  $J = 8.8$  Hz, 1H), 7.15 (dd,  $J_1 = 8.8$  Hz,  $J_2 = 3.1$  Hz, 1H), 3.92 (comp. m, 7H), 3.06 (m, 4H);  $^{13}\text{C}$  NMR (100 MHz,  $\text{CDCl}_3$ )  $\delta$  163.38, 158.14, 143.88, 127.71, 124.64, 121.04, 115.08, 67.46, 55.97, 54.13; IR (neat)  $\nu$  3705, 2845, 1737, 1691, 1656, 1506, 1477, 1337, 1234, 1144, 1116, 1047, 1033, 1000  $\text{cm}^{-1}$ ; HRMS (ESI-TOF)  $m/z$  Calcd for  $\text{C}_{19}\text{H}_{15}\text{F}_7\text{N}_2\text{O}_3$   $[\text{M}+\text{H}]^+$  453.1044, found 453.1051.

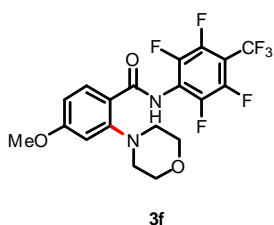

**4-methoxy-2-morpholino-*N*-(2,3,5,6-tetrafluoro-4-(trifluoromethyl)phenyl)benzamide (3f):** white powder (79.6 mg, 88% yield).  $^1\text{H}$  NMR (400 MHz,  $\text{CDCl}_3$ )  $\delta$  12.77 (s, 1H), 8.30 (d,  $J = 8.6$  Hz, 1H), 6.89 (comp. m, 2H), 3.88 (comp. m, 7H), 3.06 (m, 4H);  $^{13}\text{C}$  NMR (100 MHz,  $\text{CDCl}_3$ )  $\delta$  164.09, 163.33, 152.97, 134.47, 119.18, 111.23, 109.42, 67.37, 55.87, 54.04; IR (neat)  $\nu$  2965, 2849, 1739, 1688, 1654, 1601, 1507, 1474, 1458, 1337, 1231, 1143, 1115, 997, 863  $\text{cm}^{-1}$ ; HRMS (ESI-TOF)  $m/z$  Calcd for  $\text{C}_{19}\text{H}_{15}\text{F}_7\text{N}_2\text{O}_3$   $[\text{M}+\text{H}]^+$  453.1044, found 453.1060.

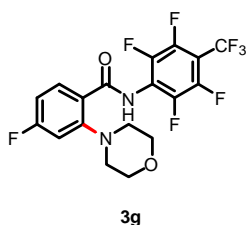

**4-fluoro-2-morpholino-*N*-(2,3,5,6-tetrafluoro-4-(trifluoromethyl)phenyl)benzamide (3g):** white solid (60.7 mg, 69% yield).  $^1\text{H}$  NMR (400 MHz,  $\text{CDCl}_3$ )  $\delta$  12.53 (s, 1H), 8.35 (dd,  $J_1 = 8.8$  Hz,  $J_2 = 6.7$  Hz, 1H), 7.09 (comp. m, 2H), 3.89 (m, 4H), 3.06 (m, 4H);  $^{13}\text{C}$  NMR (100 MHz,  $\text{CDCl}_3$ )  $\delta$  167.98 (d,  $J = 255.6$  Hz), 162.70, 153.36 (d,  $J = 8.0$  Hz), 134.98 (d,  $J = 10.0$  Hz), 123.00 (d,  $J = 4.0$  Hz), 114.20 (d,  $J = 21.1$  Hz), 110.21 (d,  $J = 22.1$  Hz), 67.22, 54.08; IR (neat)  $\nu$  3749, 2319, 1691, 1474, 1460, 1338, 998, 897  $\text{cm}^{-1}$ ; HRMS (ESI-TOF)  $m/z$  Calcd for  $\text{C}_{18}\text{H}_{12}\text{F}_8\text{N}_2\text{O}_2$   $[\text{M}+\text{H}]^+$  441.0844, found 441.0861.

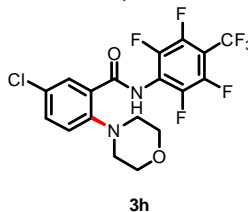

**3-chloro-6-morpholino-*N*-(2,3,5,6-tetrafluoro-4-(trifluoromethyl)phenyl)benzamide (3h):** white solid (54.8 mg, 60% yield).  $^1\text{H}$  NMR (400 MHz,  $\text{CDCl}_3$ )  $\delta$  12.99 (s, 1H), 8.33 (d,  $J = 2.4$  Hz, 1H), 7.57 (dd,  $J_1 = 8.6$  Hz,  $J_2 = 2.4$  Hz, 1H), 7.41 ( $J = 8.6$  Hz, 1H), 3.90 (m, 4H), 3.08 (m, 4H);  $^{13}\text{C}$  NMR (100 MHz,  $\text{CDCl}_3$ )  $\delta$  162.14, 149.25, 133.71, 132.82, 132.02, 128.01, 124.31, 67.04, 53.80; IR (neat)  $\nu$  3750, 2857, 1692, 1655, 1506, 1475, 1459, 1336, 1236, 1143, 1115, 999, 918, 878  $\text{cm}^{-1}$ ; HRMS (ESI-TOF)  $m/z$  Calcd for  $\text{C}_{18}\text{H}_{12}\text{ClF}_7\text{N}_2\text{O}_2$   $[\text{M}+\text{H}]^+$  457.0548, found 457.0564.

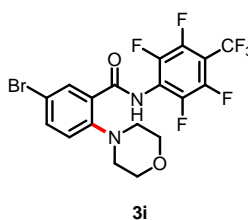

**3-bromo-6-morpholino-*N*-(2,3,5,6-tetrafluoro-4-(trifluoromethyl)phenyl)benzamide (3i):** white solid (56.1 mg, 56% yield).  $^1\text{H}$  NMR (400 MHz,  $\text{CDCl}_3$ )  $\delta$  12.92 (s, 1H), 8.47 (d,  $J = 2.4$  Hz, 1H), 7.72 (dd,  $J_1 = 8.6$  Hz,  $J_2 = 2.4$  Hz, 1H), 7.34 ( $J = 8.6$  Hz, 1H), 3.90 (m, 4H), 3.08 (m, 4H);  $^{13}\text{C}$  NMR (100 MHz,  $\text{CDCl}_3$ )  $\delta$  162.05, 149.78, 136.69, 135.01, 128.20, 124.51, 120.49, 67.02, 53.75; IR (neat)  $\nu$  3706, 2864, 2844, 2707, 2318, 1462, 1339, 1055, 1033, 1012, 914, 897  $\text{cm}^{-1}$ ; HRMS (ESI-TOF)  $m/z$  Calcd for  $\text{C}_{18}\text{H}_{12}\text{SF}_7\text{N}_2\text{O}_2$   $[\text{M}+\text{H}]^+$  501.0043, found 501.0057.

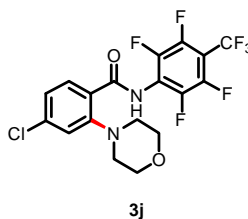

**4-chloro-2-morpholino-*N*-(2,3,5,6-tetrafluoro-4-(trifluoromethyl)phenyl)benzamide (3j):** white solid (65.8 mg, 72% yield).  $^1\text{H}$  NMR (400 MHz,  $\text{CDCl}_3$ )  $\delta$  12.61 (s, 1H), 8.27 (d,  $J = 8.6$  Hz, 1H), 7.41 (s, 1H), 7.37 ( $J = 8.6$  Hz, 1H), 3.90 (m, 4H), 3.09 (m, 4H);  $^{13}\text{C}$

**NMR** (100 MHz, CDCl<sub>3</sub>)  $\delta$  162.48, 151.89, 139.76, 133.56, 127.01, 124.90, 123.14, 66.96, 53.79; **IR** (neat)  $\nu$  2966, 2854, 1692, 1589, 1507, 1458, 1337, 1236, 1145, 1115, 997, 945 cm<sup>-1</sup>; **HRMS** (ESI-TOF)  $m/z$  Calcd for C<sub>18</sub>H<sub>12</sub>ClF<sub>7</sub>N<sub>2</sub>O<sub>2</sub> [M+H]<sup>+</sup> 457.0548, found 457.0566.

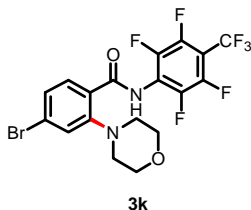

3k

**4-bromo-2-morpholino-N-(2,3,5,6-tetrafluoro-4-(trifluoromethyl)phenyl)benzamide (3k)**: white solid (75.2 mg, 75% yield). **<sup>1</sup>H NMR** (400 MHz, CDCl<sub>3</sub>)  $\delta$  12.58 (s, 1H), 8.20 (d,  $J$  = 8.6 Hz, 1H), 7.56 ( $J$  = 2.4 Hz, 1H), 7.53 (dd,  $J_1$  = 8.6 Hz,  $J_2$  = 2.4 Hz, 1H), 3.90 (m, 4H), 3.10 (m, 4H); **<sup>13</sup>C NMR** (100 MHz, CDCl<sub>3</sub>)  $\delta$  162.64, 151.88, 133.69, 130.08, 128.22, 126.17, 125.43, 67.00, 53.86; **IR** (neat)  $\nu$  2963, 2924, 2853, 1691, 1584, 1505, 1472, 1456, 1336, 1234, 1186, 1143, 1114, 996, 936, 791 cm<sup>-1</sup>; **HRMS** (ESI-TOF)  $m/z$  Calcd for C<sub>18</sub>H<sub>12</sub>SF<sub>7</sub>N<sub>2</sub>O<sub>2</sub> [M+H]<sup>+</sup> 501.0043, found 501.0062.

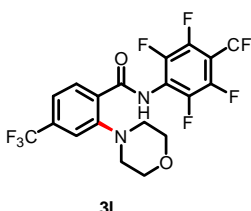

3l

**4-trifluoromethyl-2-morpholino-N-(2,3,5,6-tetrafluoro-4-(trifluoromethyl)phenyl)benzamide (3l)**: white solid (66.7 mg, 68% yield). **<sup>1</sup>H NMR** (400 MHz, CDCl<sub>3</sub>)  $\delta$  12.61 (s, 1H), 8.46 (d,  $J$  = 8.0 Hz, 1H), 7.67 (s, 1H), 7.64 (d,  $J$  = 8.0 Hz, 1H), 3.93 (m, 4H), 3.14 (m, 4H); **<sup>13</sup>C NMR** (100 MHz, CDCl<sub>3</sub>)  $\delta$  162.26, 151.35, 135.41 (q,  $J_{C-F}$  = 32.8 Hz), 133.20, 129.58, 123.24 (q,  $J_{C-F}$  = 3.6 Hz), 123.10 (q,  $J_{C-F}$  = 273.6 Hz), 119.49 (q,  $J_{C-F}$  = 3.6 Hz), 66.95, 53.81; **IR** (neat)  $\nu$  3749, 2849, 2707, 2692, 2319, 1694, 1656, 1613, 1505, 1474, 1459, 1418, 1332, 1128, 1113, 996, 948 cm<sup>-1</sup>; **HRMS** (ESI-TOF)  $m/z$  Calcd for C<sub>19</sub>H<sub>12</sub>F<sub>10</sub>N<sub>2</sub>O<sub>2</sub> [M+H]<sup>+</sup> 491.0812, found 491.0824.

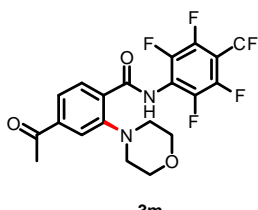

3m

**4-acetyl-6-morpholino-N-(2,3,5,6-tetrafluoro-4-(trifluoromethyl)phenyl)benzamide (3m)**: white solid (65.0 mg, 70% yield). **<sup>1</sup>H NMR** (400 MHz, CDCl<sub>3</sub>)  $\delta$  12.91 (s, 1H), 8.45 (d,  $J$  = 8.1 Hz, 1H), 8.06 (s, 1H), 7.91 (dd,  $J_1$  = 8.1 Hz,  $J_2$  = 0.8 Hz, 1H), 3.92 (m, 4H), 3.15 (m, 4H), 2.68 (s, 3H); **<sup>13</sup>C NMR** (100 MHz, CDCl<sub>3</sub>)  $\delta$  196.87, 162.57, 151.25, 141.07, 132.87, 130.06, 126.36, 121.92, 67.01, 53.78, 26.88; **IR** (neat)  $\nu$  2923, 2853, 1685, 1506, 1336, 1234, 1141, 996, 927, 875, 855, 715 cm<sup>-1</sup>; **HRMS** (ESI-TOF)  $m/z$  Calcd for C<sub>20</sub>H<sub>15</sub>F<sub>7</sub>N<sub>2</sub>O<sub>3</sub> [M+H]<sup>+</sup> 465.1044, found 465.1061.

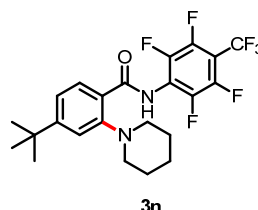

3n

**4-(tert-butyl)-2-(piperidin-1-yl)-N-(2,3,5,6-tetrafluoro-4-(trifluoromethyl)phenyl)benzamide (3n)**: white solid (92.3 mg, 97% yield). **<sup>1</sup>H NMR** (400 MHz, CDCl<sub>3</sub>)  $\delta$  13.7 (s, 1H), 8.25 (d,  $J$  = 8.4 Hz, 1H), 7.41–7.35 (m, 2H), 3.01 (m, 4H), 1.76 (m, 4H), 1.63 (m, 2H), 1.33 (s, 9H); **<sup>13</sup>C NMR** (100 MHz, CDCl<sub>3</sub>)  $\delta$  163.87, 157.72, 152.61, 131.80, 123.74, 123.57, 119.64, 55.29, 35.56, 31.32, 26.71, 23.65; **IR** (neat)  $\nu$  3750, 2862, 2707, 2319, 1692, 1605, 1507, 1475, 1338, 1144, 998 cm<sup>-1</sup>; **HRMS** (ESI-TOF)  $m/z$  Calcd for C<sub>23</sub>H<sub>23</sub>F<sub>7</sub>N<sub>2</sub>O [M+H]<sup>+</sup> 477.1771, found 477.1780.

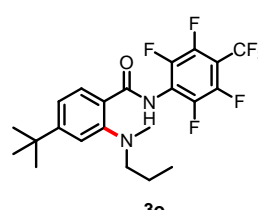

3o

**4-(tert-butyl)-2-(methyl(propyl)amino)-N-(2,3,5,6-tetrafluoro-4-(trifluoromethyl)phenyl)benzamide (3o)**: yellow oil (74.2 mg, 80% yield). **<sup>1</sup>H NMR** (400 MHz, CDCl<sub>3</sub>)  $\delta$  13.80 (s, 1H), 8.23 (d,  $J$  = 8.2 Hz, 1H), 7.38–7.35 (m, 2H), 3.01 (t,  $J$  = 7.7 Hz, 2H), 2.77 (s, 3H), 1.52 (m, 2H), 1.34 (s, 9H), 0.88 (t,  $J$  = 7.4, 3H); **<sup>13</sup>C NMR** (100 MHz, CDCl<sub>3</sub>)  $\delta$

163.83, 157.76, 151.71, 131.63, 124.40, 123.69, 119.64, 59.51, 44.77, 35.50, 31.25, 20.87, 11.88; **IR** (neat)  $\nu$  3750, 2873, 2692, 2318, 1739, 1691, 1655, 1606, 1506, 1470, 1337, 1236, 1144, 997  $\text{cm}^{-1}$ ; **HRMS** (ESI-TOF)  $m/z$  Calcd for  $\text{C}_{22}\text{H}_{23}\text{F}_7\text{N}_2\text{O}$   $[\text{M}+\text{H}]^+$  465.1771, found 465.1789.

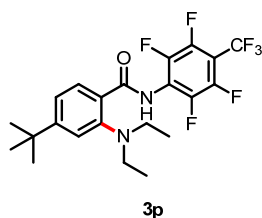

**4-(tert-butyl)-2-(diethylamino)-N-(2,3,5,6-tetrafluoro-4-(trifluoromethyl)phenyl)benzamide (3p)**: yellow oil (67.8 mg, 73% yield).  **$^1\text{H}$  NMR** (400 MHz,  $\text{CDCl}_3$ )  $\delta$  8.26 (d,  $J = 8.3$  Hz, 1H), 7.38 (d,  $J = 8.4$  Hz, 1H), 7.34 (s, 1H), 3.11 (dd,  $J_1 = 14.4$  Hz,  $J_2 = 7.2$  Hz, 4H), 1.33 (s, 9H), 1.03 (t,  $J = 7.2$  Hz, 6H);  **$^{13}\text{C}$  NMR** (125 MHz,  $\text{CDCl}_3$ )  $\delta$  163.97, 157.56, 148.99, 131.38, 126.31, 123.92, 120.77, 50.37, 35.45, 31.29, 12.23; **IR** (neat)  $\nu$  2971, 2872, 1690, 1606, 1506, 1338, 1238, 1145, 998  $\text{cm}^{-1}$ ; **HRMS** (ESI-TOF)  $m/z$  Calcd for  $\text{C}_{22}\text{H}_{23}\text{F}_7\text{N}_2\text{O}$   $[\text{M}+\text{H}]^+$  465.1771, found 465.1787.

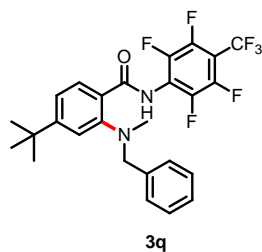

**2-(benzyl(methyl)amino)-4-(tert-butyl)-N-(2,3,5,6-tetrafluoro-4-(trifluoromethyl)phenyl)benzamide (3q)**: yellow oil (76.8 mg, 75% yield).  **$^1\text{H}$  NMR** (400 MHz,  $\text{CDCl}_3$ )  $\delta$  13.30 (s, 1H), 8.23 (d,  $J = 8.3$  Hz, 1H), 7.38–7.35 (m, 1H), 7.28–7.26 (m, 4H), 7.16–7.13 (m, 2H), 4.20 (s, 2H), 2.76 (s, 3H), 1.32 (s, 9H);  **$^{13}\text{C}$  NMR** (100 MHz,  $\text{CDCl}_3$ )  $\delta$  163.72, 157.42, 151.20, 135.66, 131.93, 129.79, 128.76, 128.30, 123.55, 120.27, 61.80, 43.67, 35.48, 31.24; **IR** (neat)  $\nu$  3749, 2866, 2707, 2693, 2319, 1691, 1655, 1605, 1507, 1473, 1338, 1146, 998  $\text{cm}^{-1}$ ; **HRMS** (ESI-TOF)  $m/z$  Calcd for  $\text{C}_{26}\text{H}_{23}\text{F}_7\text{N}_2\text{O}_5$   $[\text{M}+\text{H}]^+$  513.1771, found 513.1792.

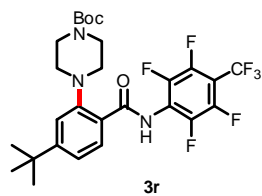

**tert-butyl 4-(5-(tert-butyl)-2-((2,3,5,6-tetrafluoro-4-(trifluoromethyl)phenyl)carbamoyl)phenyl)piperazine-1-carboxylate (3r)**: white solid (90.0 mg, 78% yield).  **$^1\text{H}$  NMR** (400 MHz,  $\text{CDCl}_3$ )  $\delta$  13.03 (s, 1H), 8.26 (d,  $J = 8.3$  Hz, 1H), 7.40–7.37 (m, 2H), 3.62 (s, 4H), 3.04 (s, 4H), 1.47 (s, 9H), 1.33 (s, 9H);  **$^{13}\text{C}$  NMR** (100 MHz,  $\text{CDCl}_3$ )  $\delta$  163.50, 158.11, 154.63, 151.00, 132.19, 124.29, 123.71, 119.54, 80.71, 53.75, 35.58, 31.26, 28.57; **IR** (neat) 2968, 1696, 1605, 1508, 1477, 1339, 1283, 1237, 1145, 998,  $\text{cm}^{-1}$ ; **HRMS** (ESI-TOF)  $m/z$  Calcd for  $\text{C}_{27}\text{H}_{30}\text{F}_7\text{N}_3\text{O}_3$   $[\text{M}+\text{H}]^+$  573.2248, found 578.2246.



**Hydrolysis of amination product (3a) to carboxylic acid (4) (eq 6)**

4-(*tert*-butyl)-2-morpholino-*N*-(2,3,5,6-tetrafluoro-4-(trifluoromethyl)phenyl)benzamide (**3a**, 48.9 mg, 0.1 mmol) was dissolved in trifluoroacetic acid, hydrochloric acid (2:1, 3 mL). The reaction mixture was stirred for 12 h at 100 °C. The reaction mixture was extracted with ethyl ether. The organic layer was washed with 1 % Na<sub>2</sub>CO<sub>3</sub>, dried over Na<sub>2</sub>SO<sub>4</sub>, and concentrated under vacuum to give the carboxylic acid (96%)

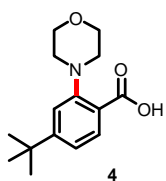

**2-morpholinobenzoic acid (4)**: white solid. <sup>1</sup>H NMR (400 MHz, CDCl<sub>3</sub>) δ 10.79 (br, 1H), 8.24 (d, *J* = 8.3 Hz, 1H), 7.53–7.50 (m, 2H), 3.98 (s, 4H), 3.33 (s, 4H), 1.35 (s, 9H); <sup>13</sup>C NMR (100 MHz, CDCl<sub>3</sub>) δ 165.66, 159.54, 131.79, 126.03, 122.02, 119.24, 105.01, 66.68, 54.47, 35.83, 31.07; IR (neat) 2966, 1740, 1694, 1606, 1508, 1339, 1238, 1146, 998 cm<sup>-1</sup>; HRMS (ESI-TOF) *m/z* Calcd for C<sub>15</sub>H<sub>21</sub>NO<sub>3</sub> [M+H]<sup>+</sup> 264.1594, found 264.1593.

**Complete Ref. 8b**

Tang, H.; Yan, Y.; Feng, Z.; de Jesus, R. K.; Yang, L.; Levorse, D. A.; Owens, K. A.; Akiyama, T. E.; Bergeron, R.; Castriota, G. A.; Doebber, T. W.; Ellsworth, K. P.; Lassman, M. E.; Li, C.; Wu, M. S.; Zhang, B. B.; Chapman, K. T.; Mills, S. G.; Berger, J. P.; Pasternak, A. *Bioorg. Med. Chem. Lett.* **2010**, 20, 6088



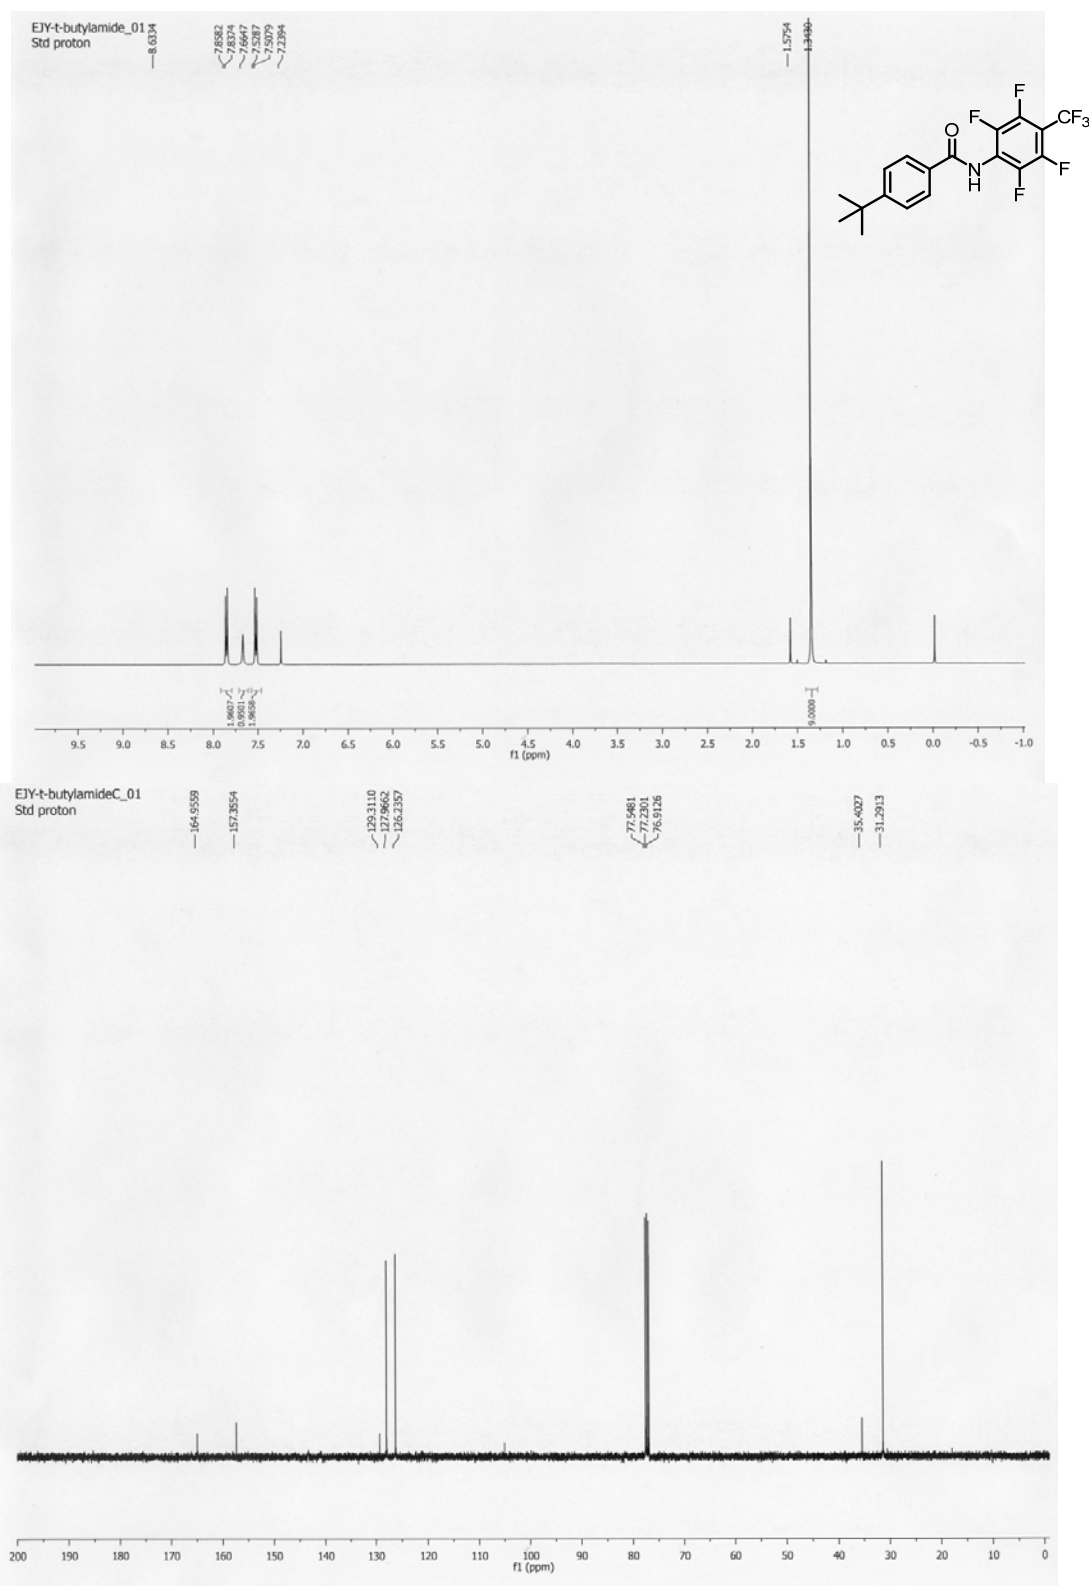

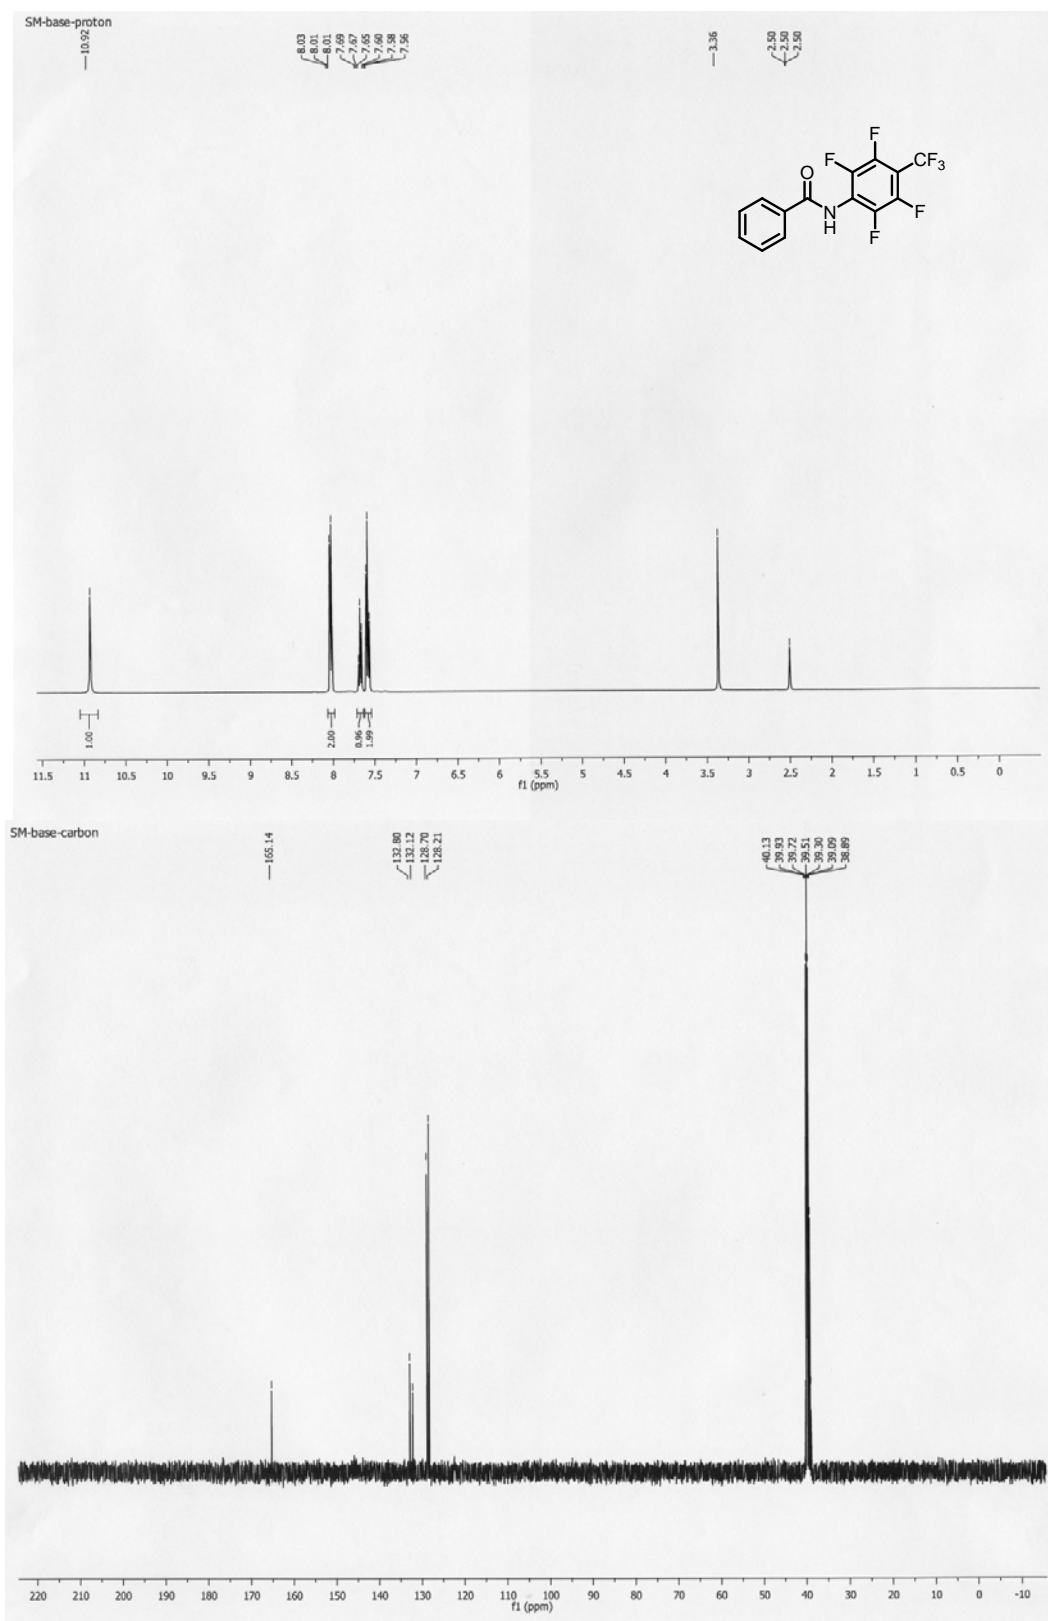

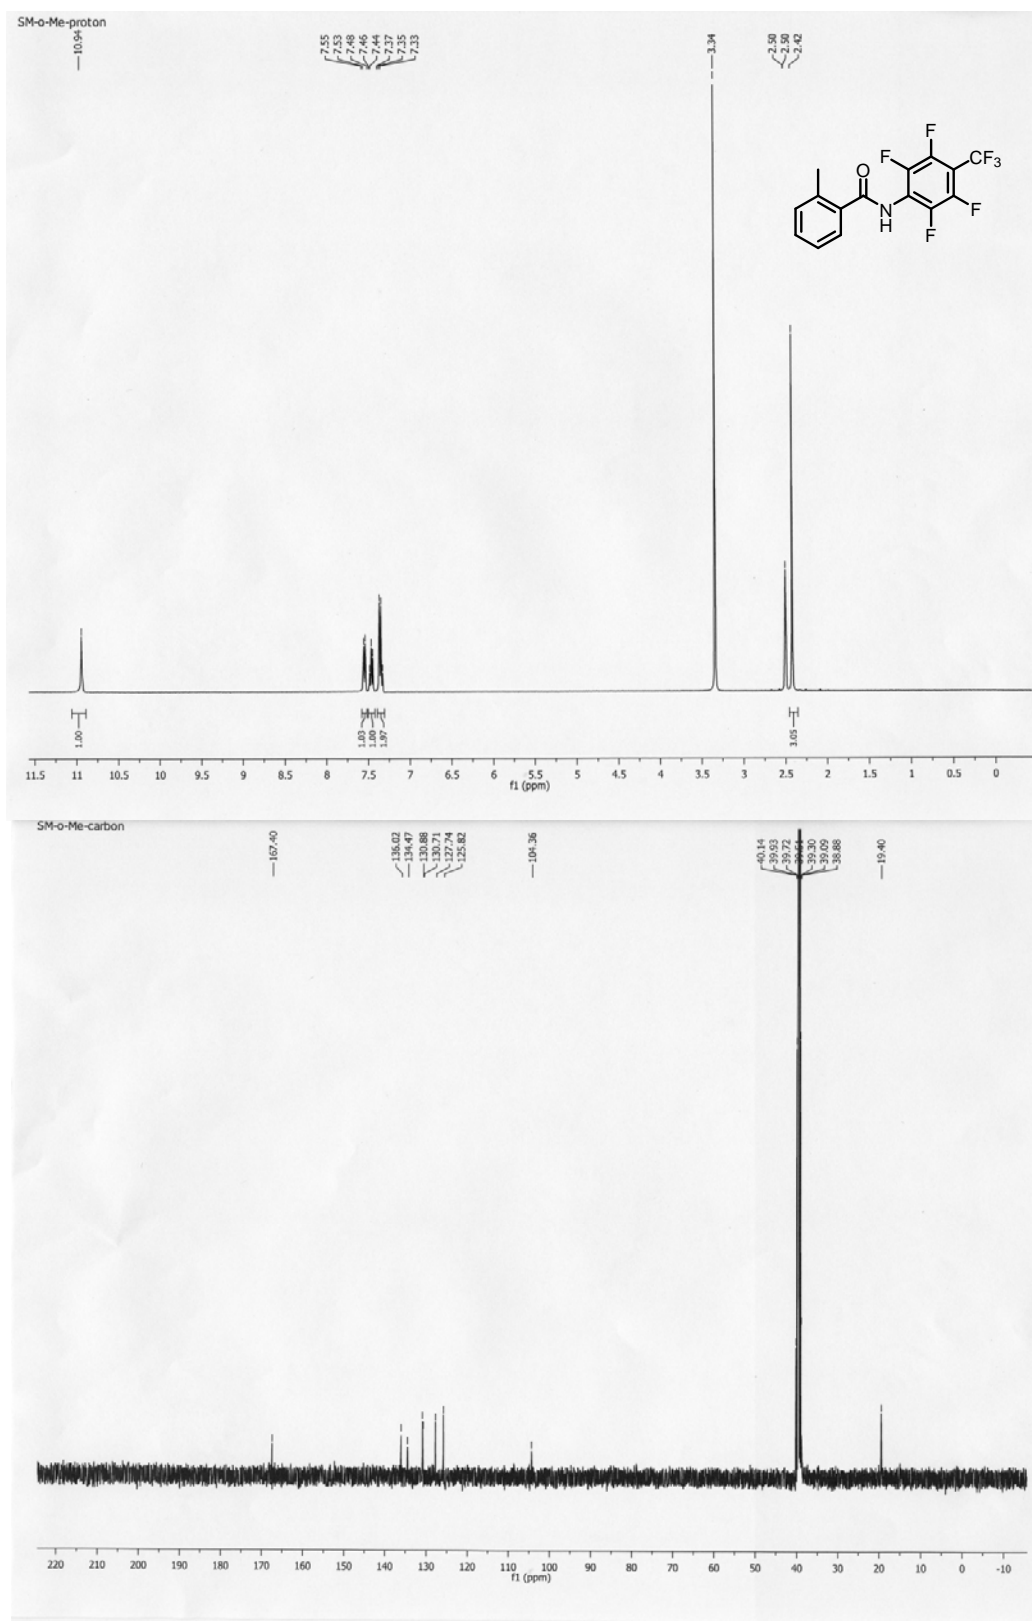

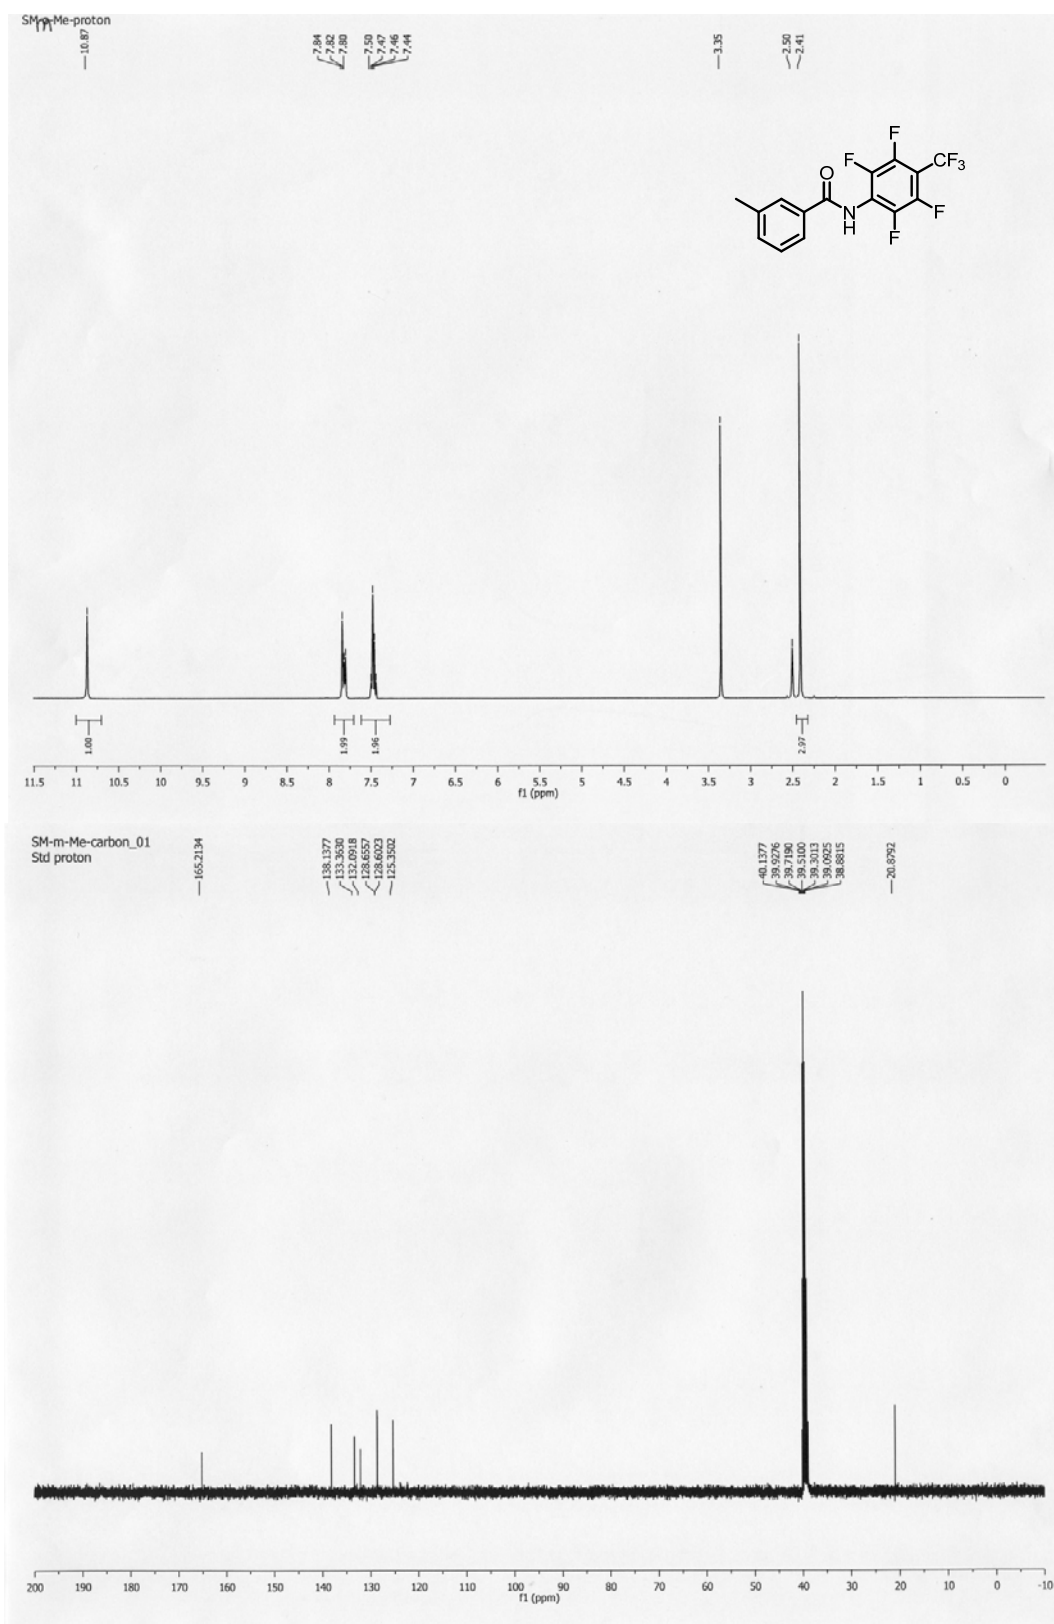

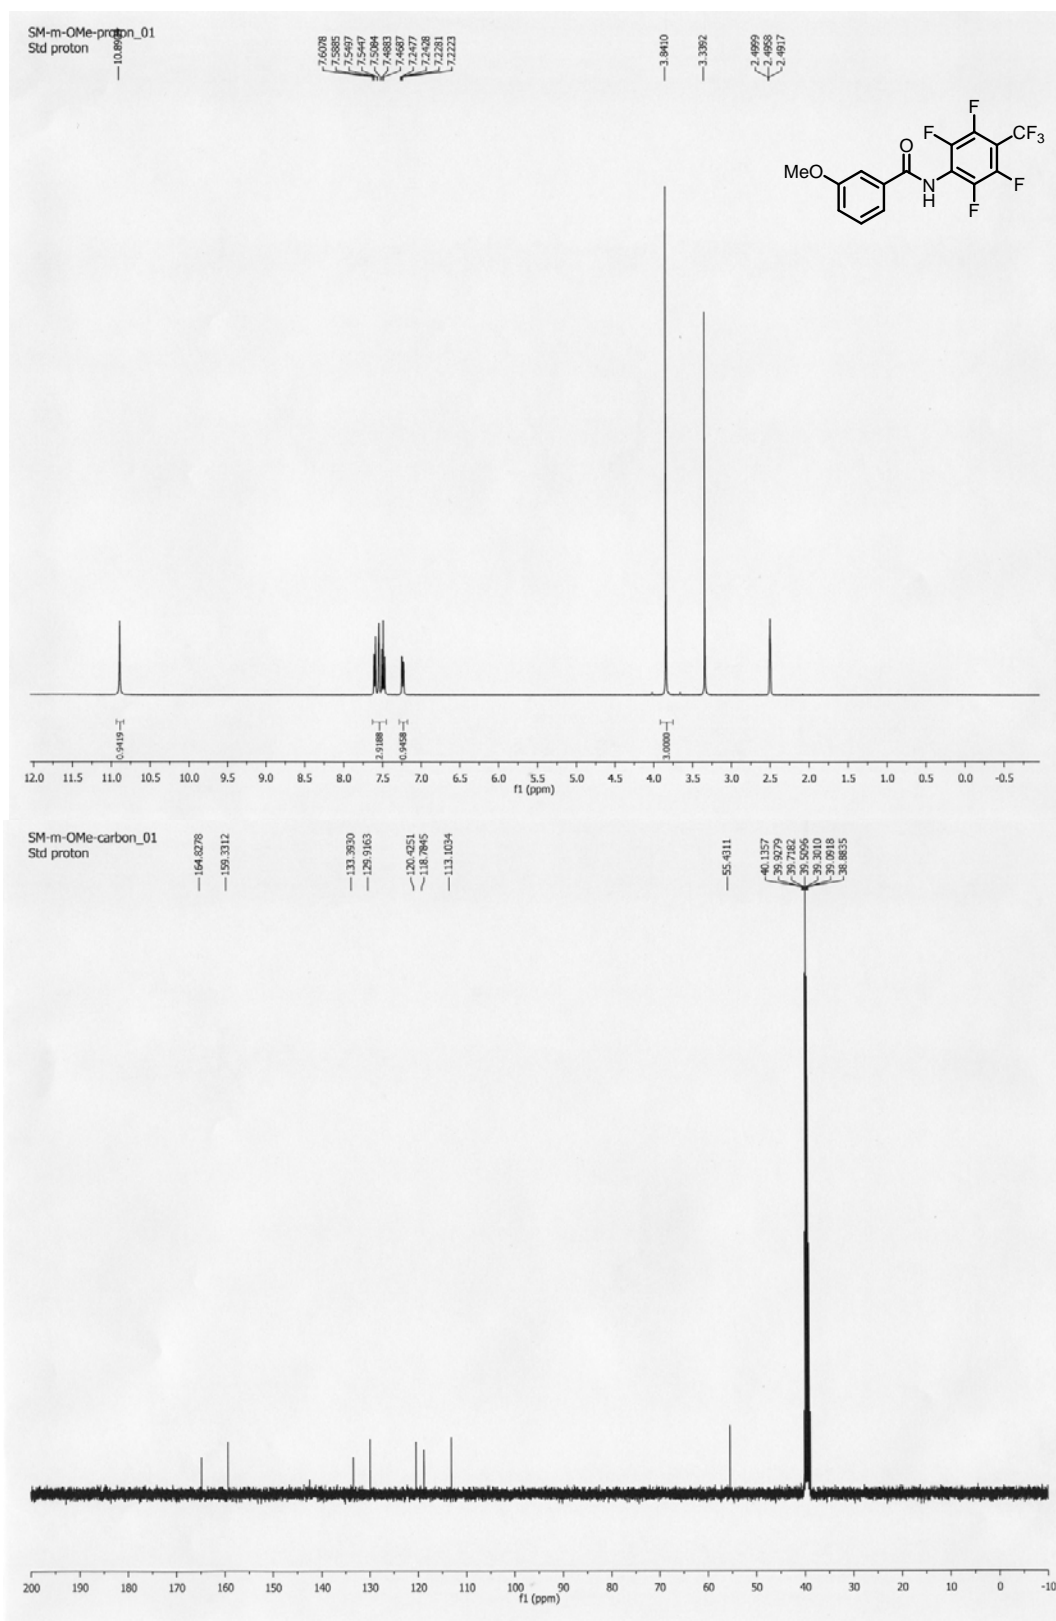

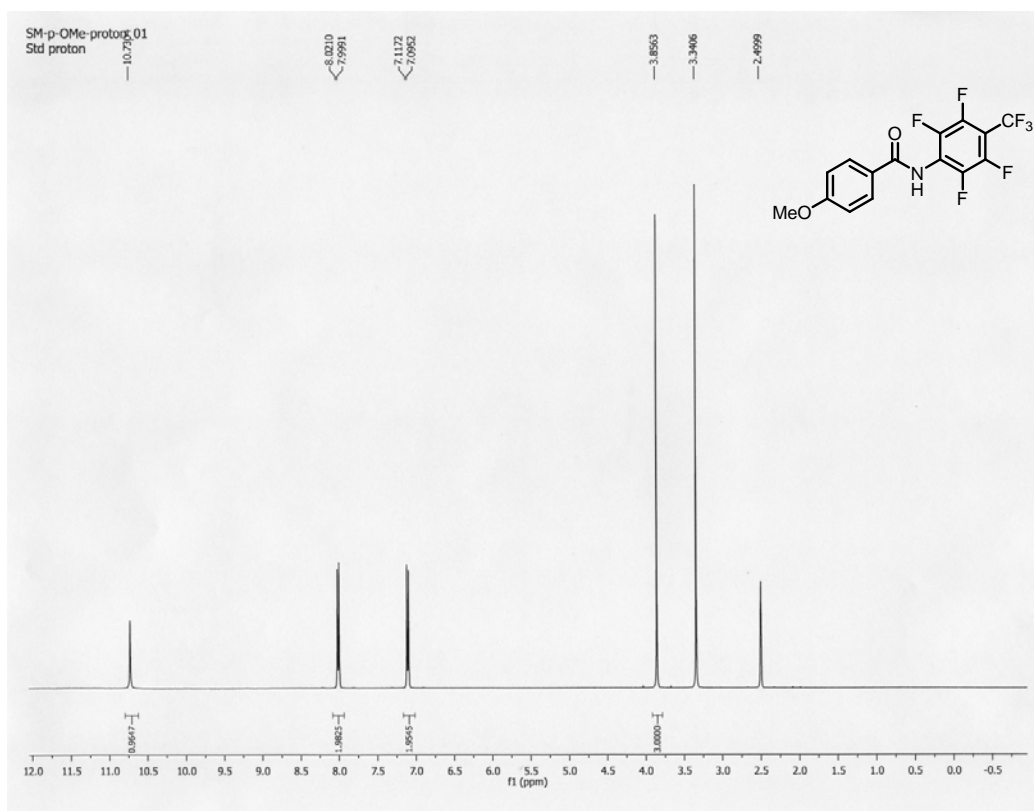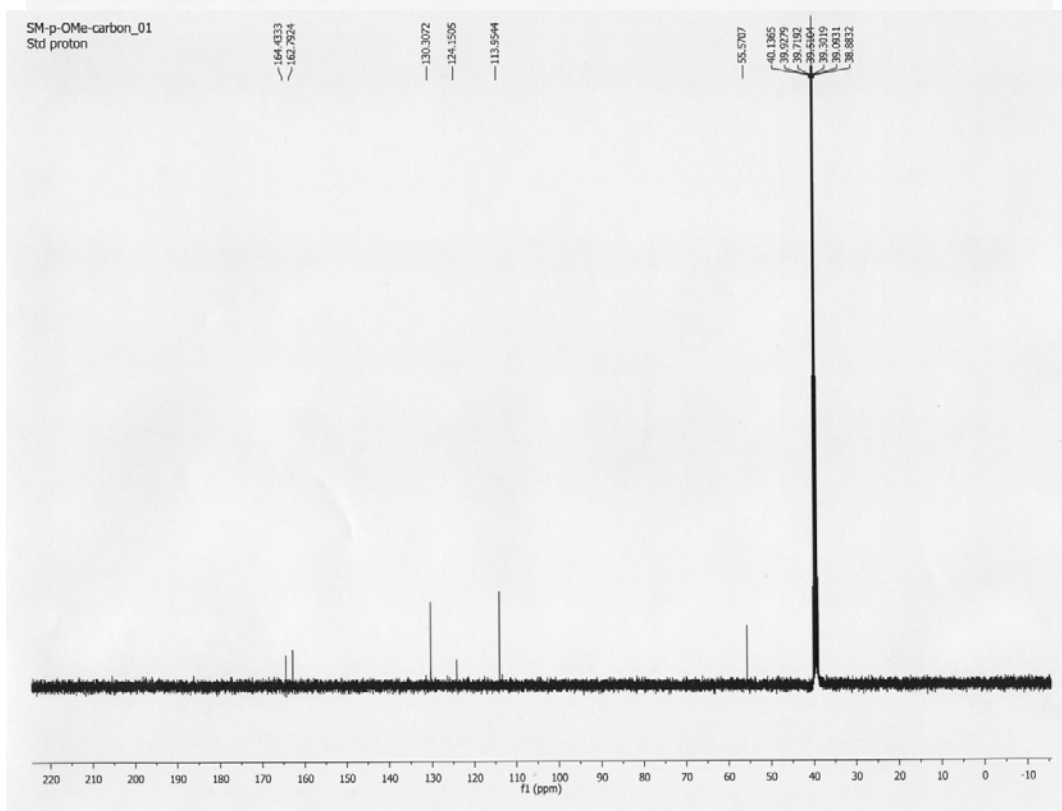

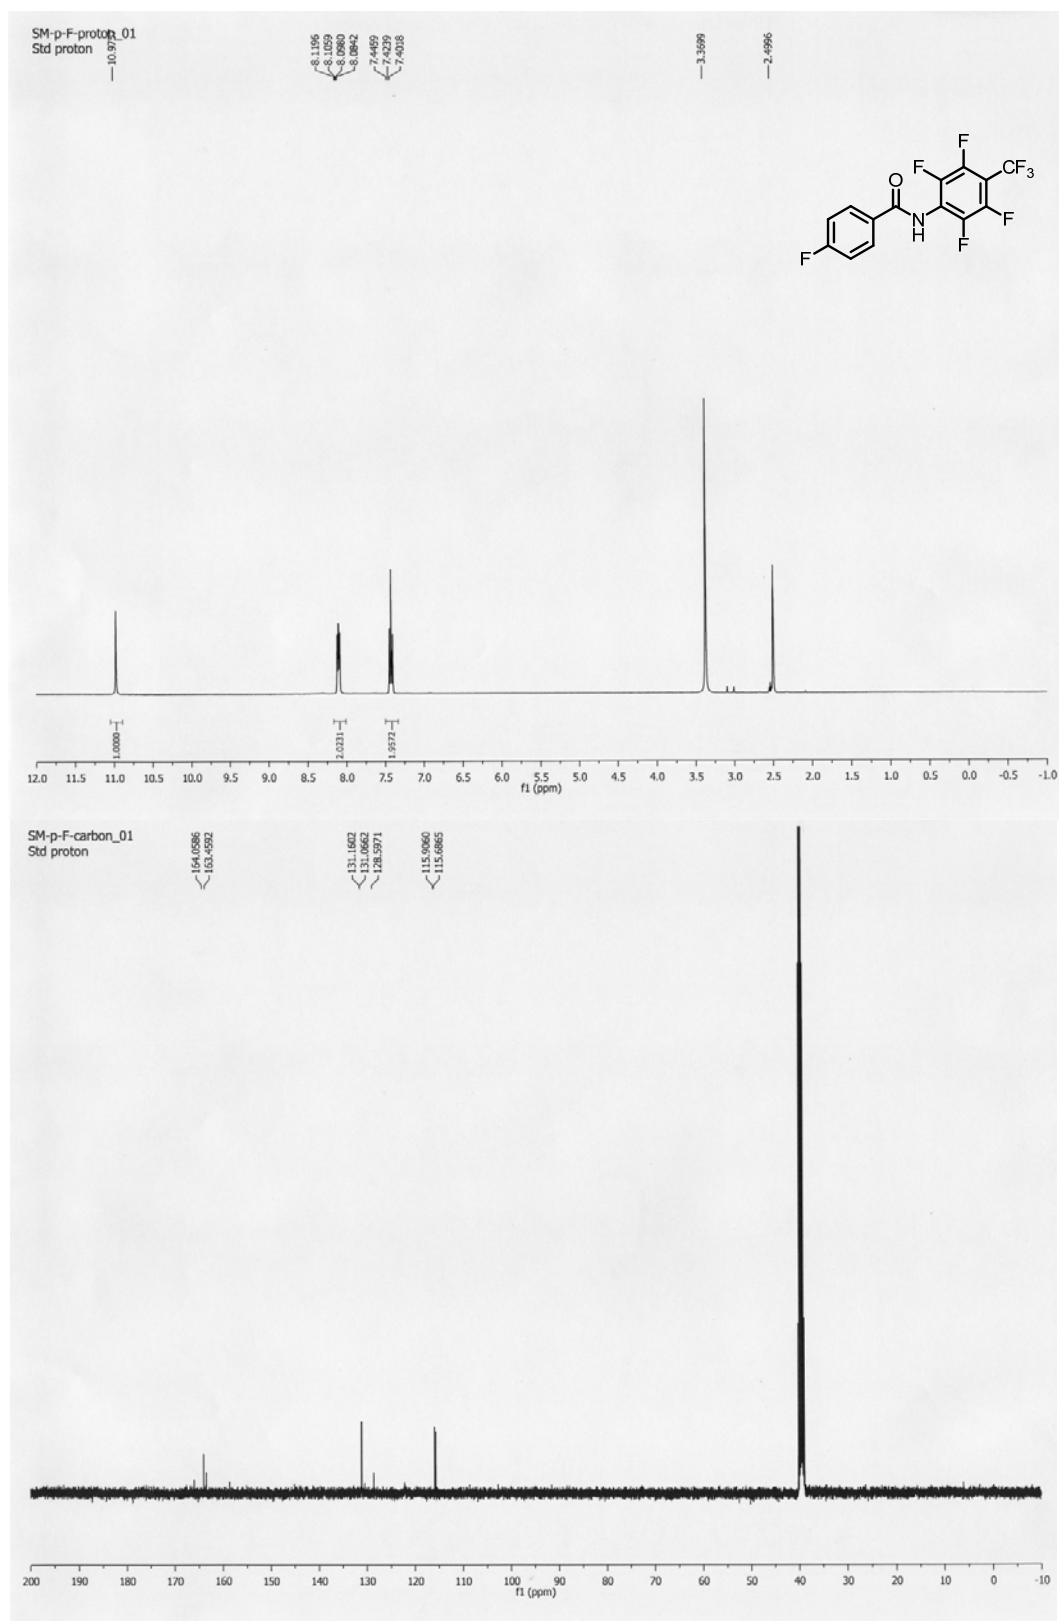

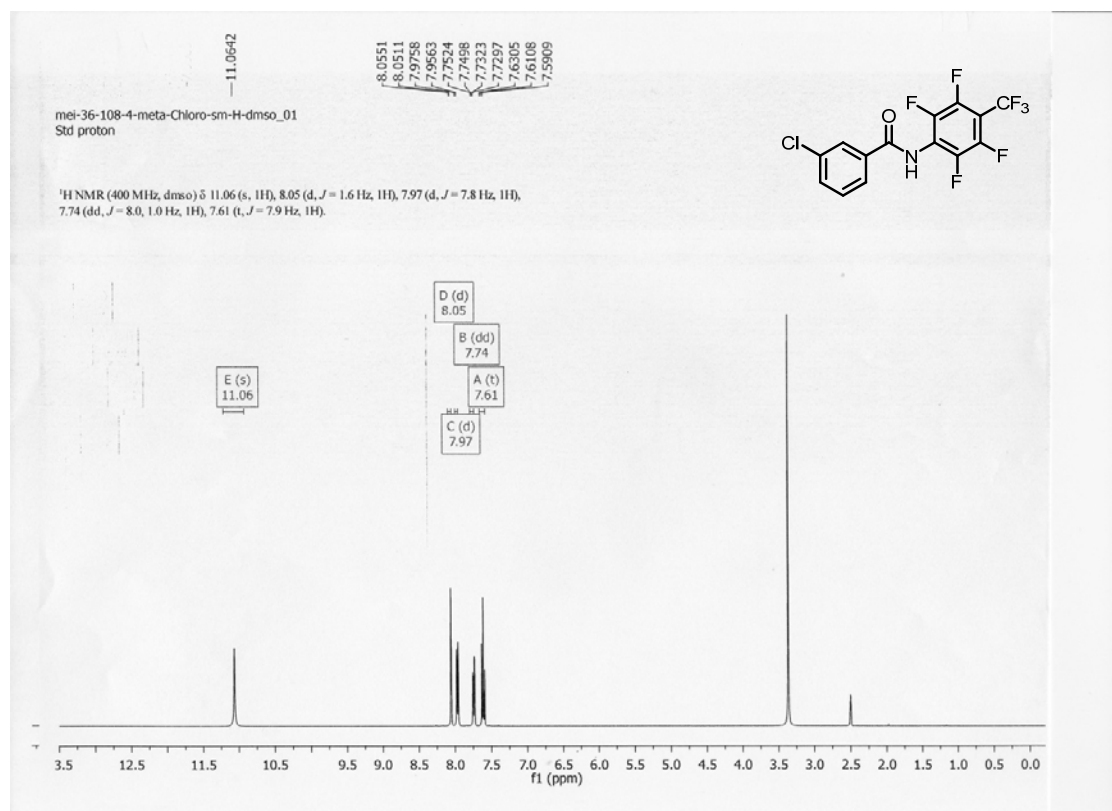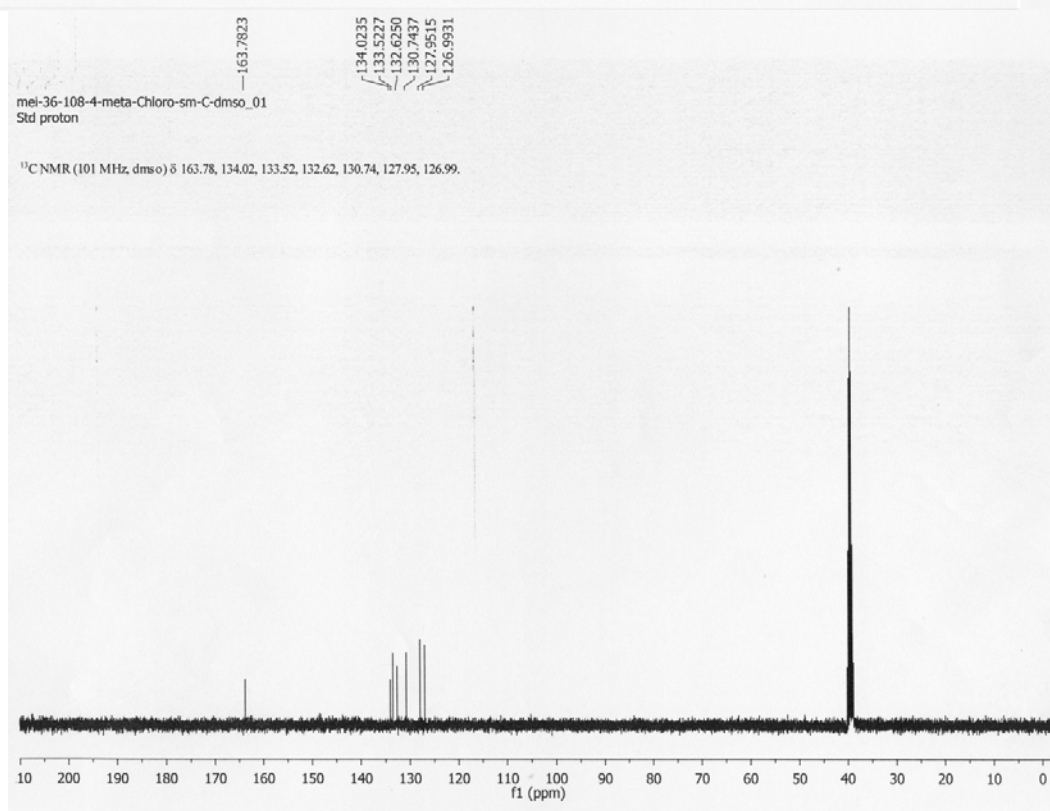



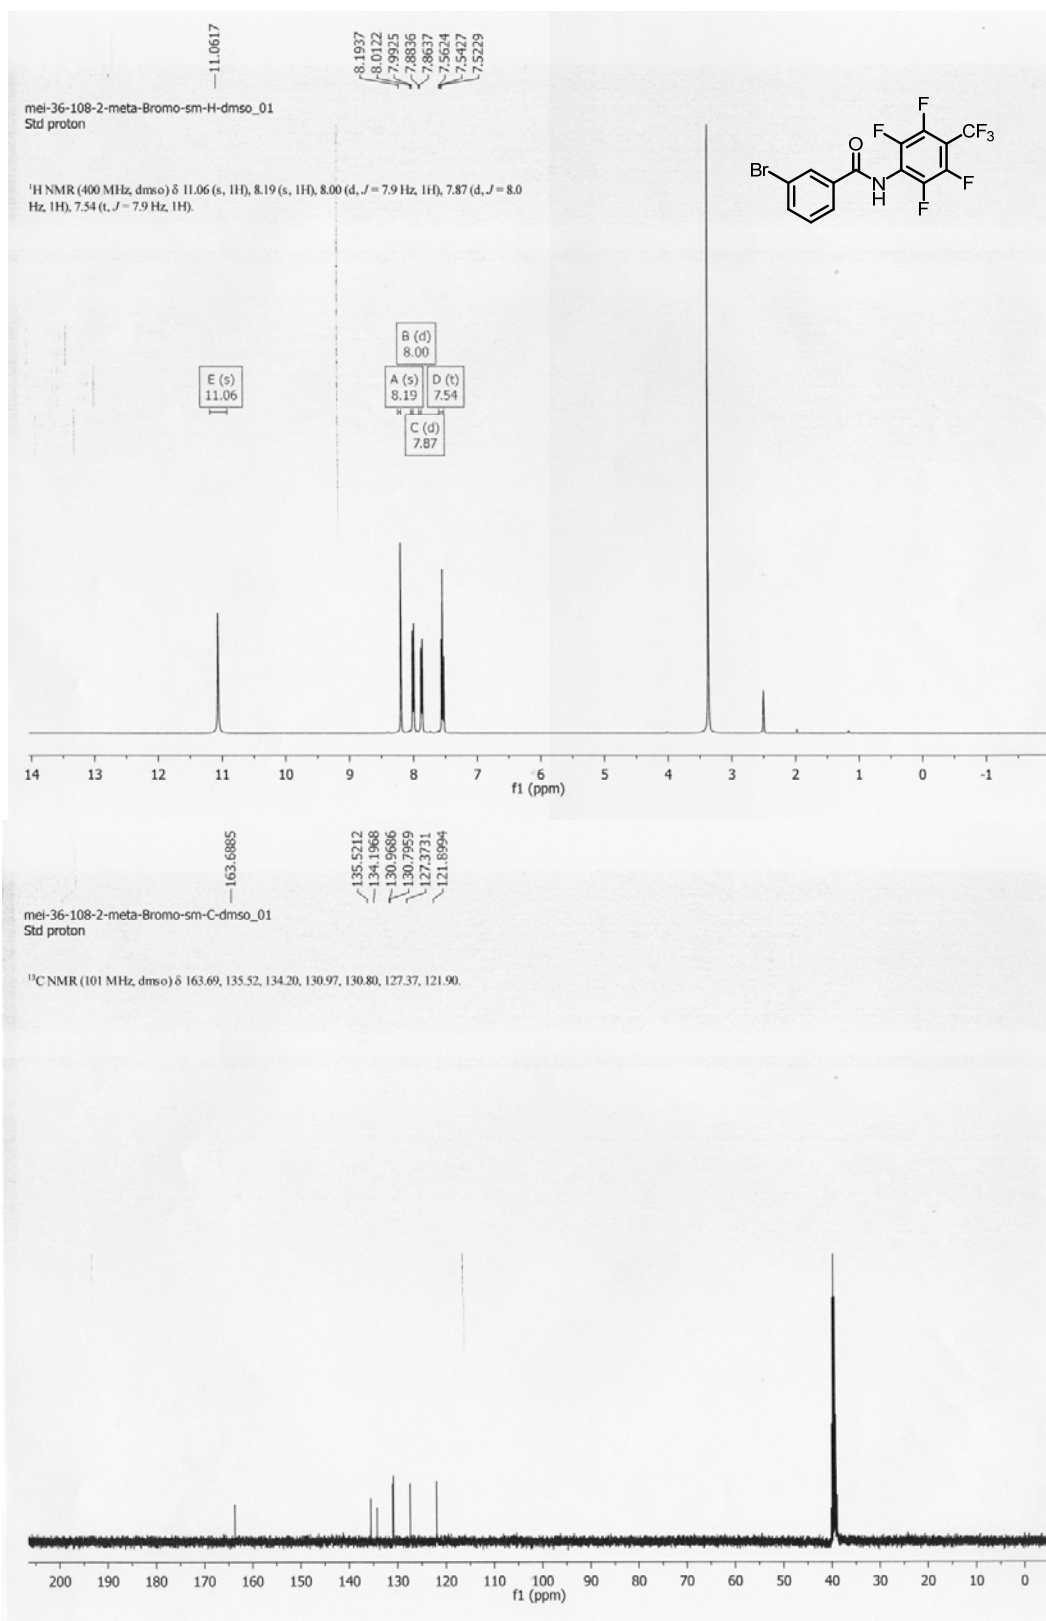

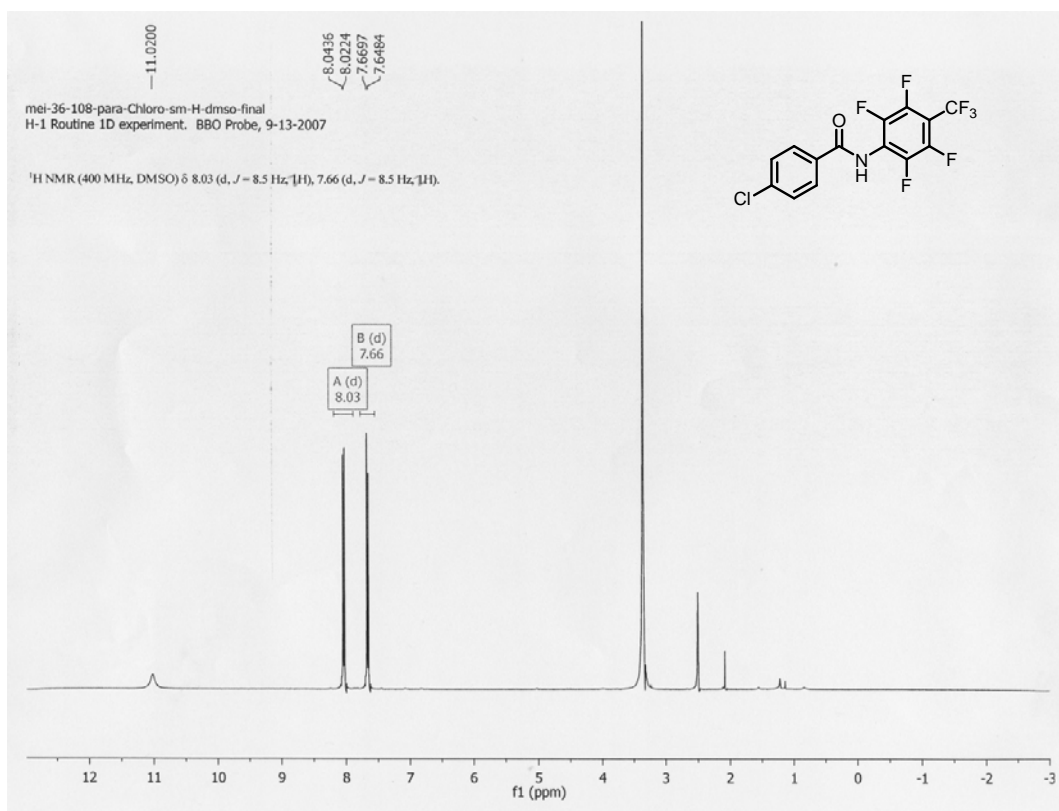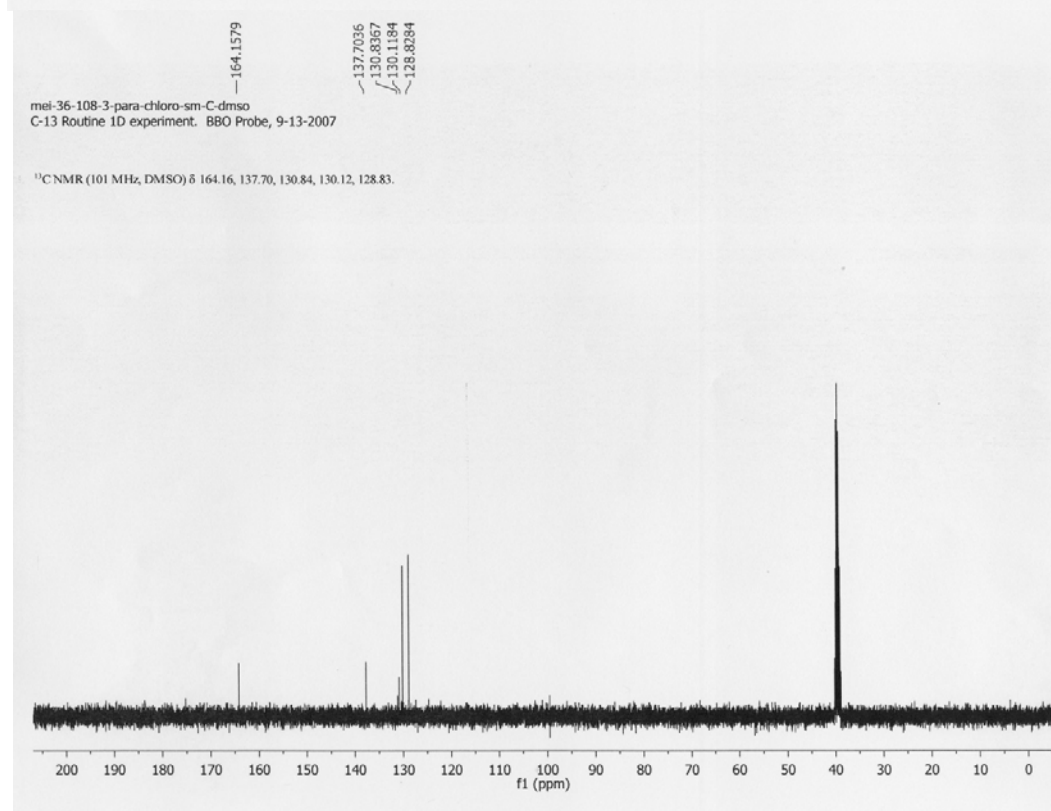

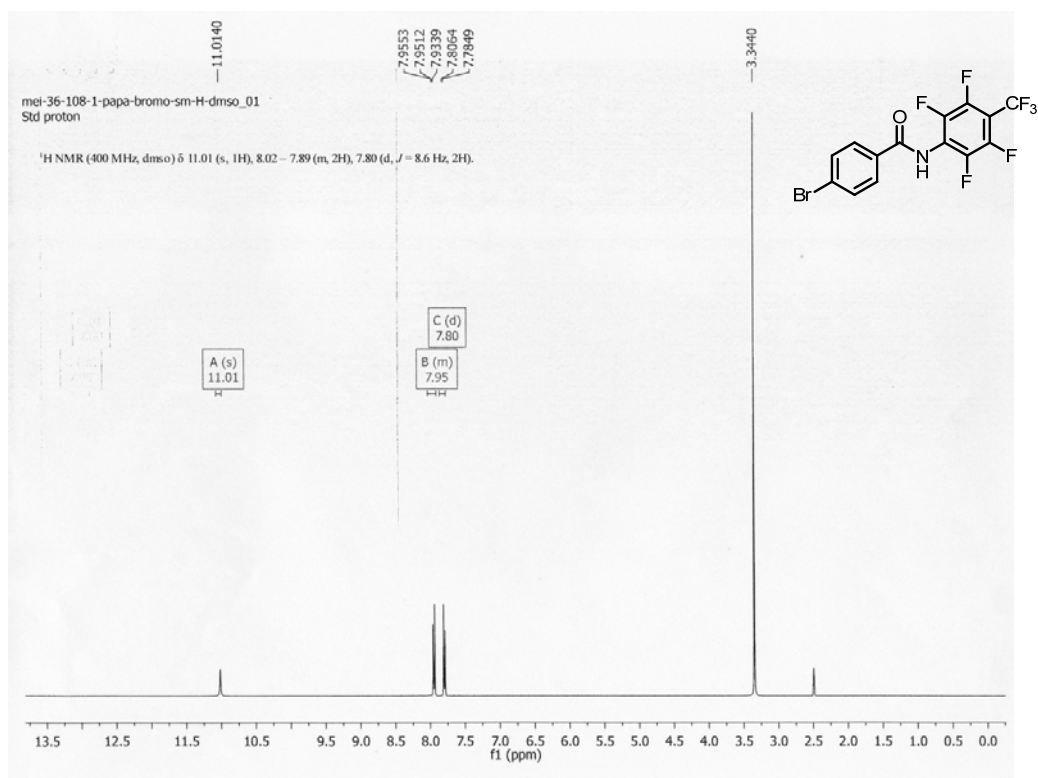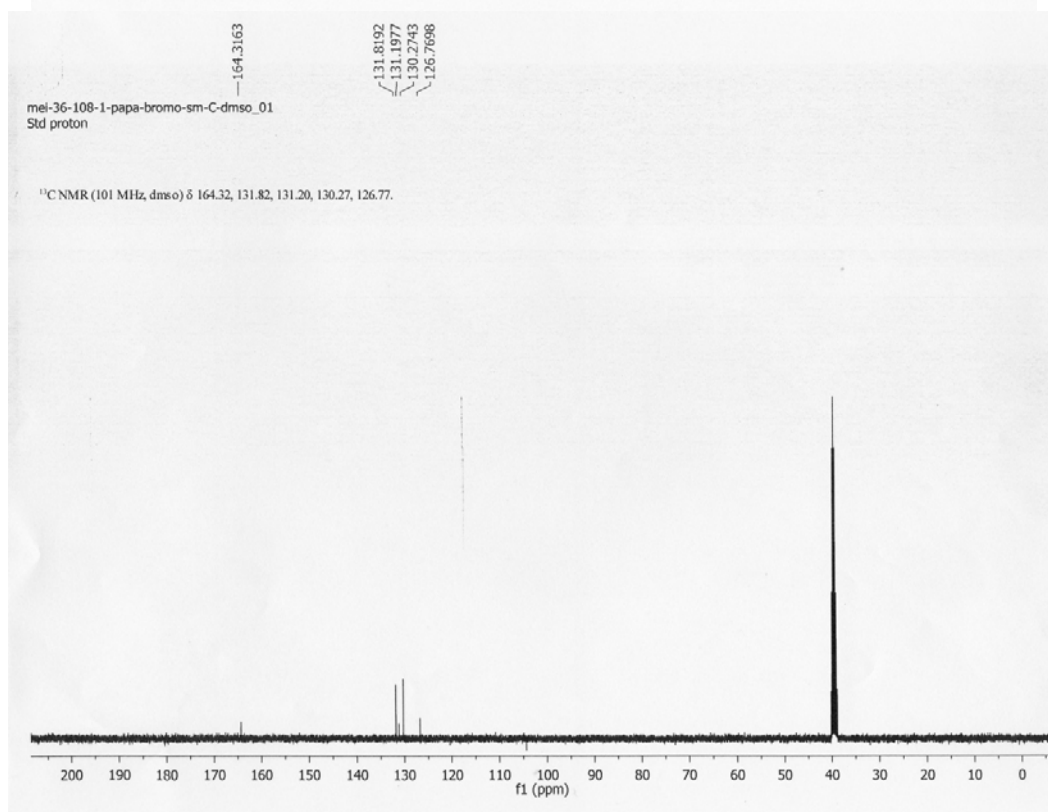

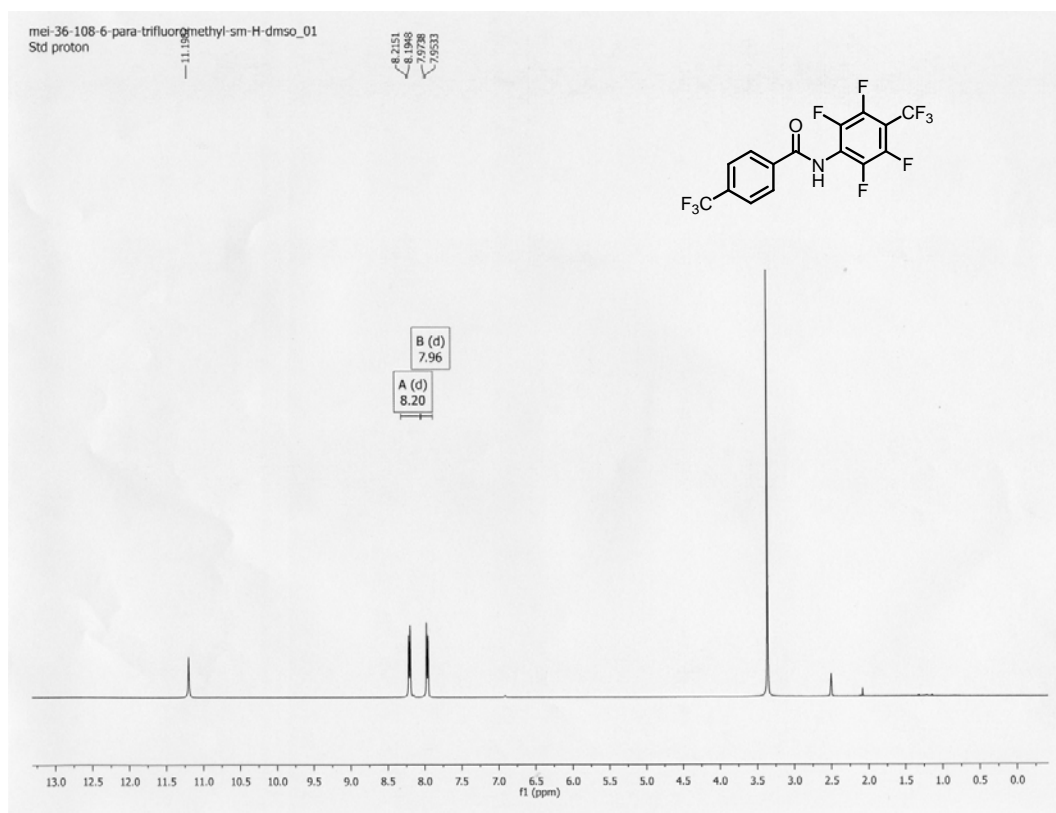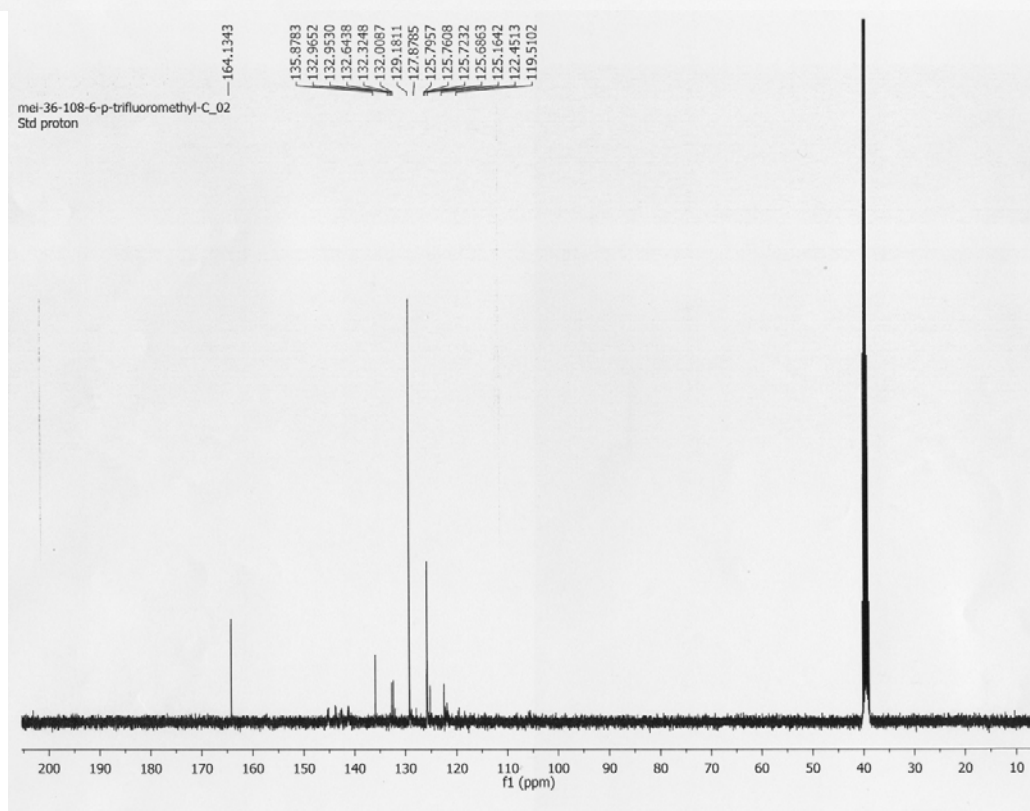

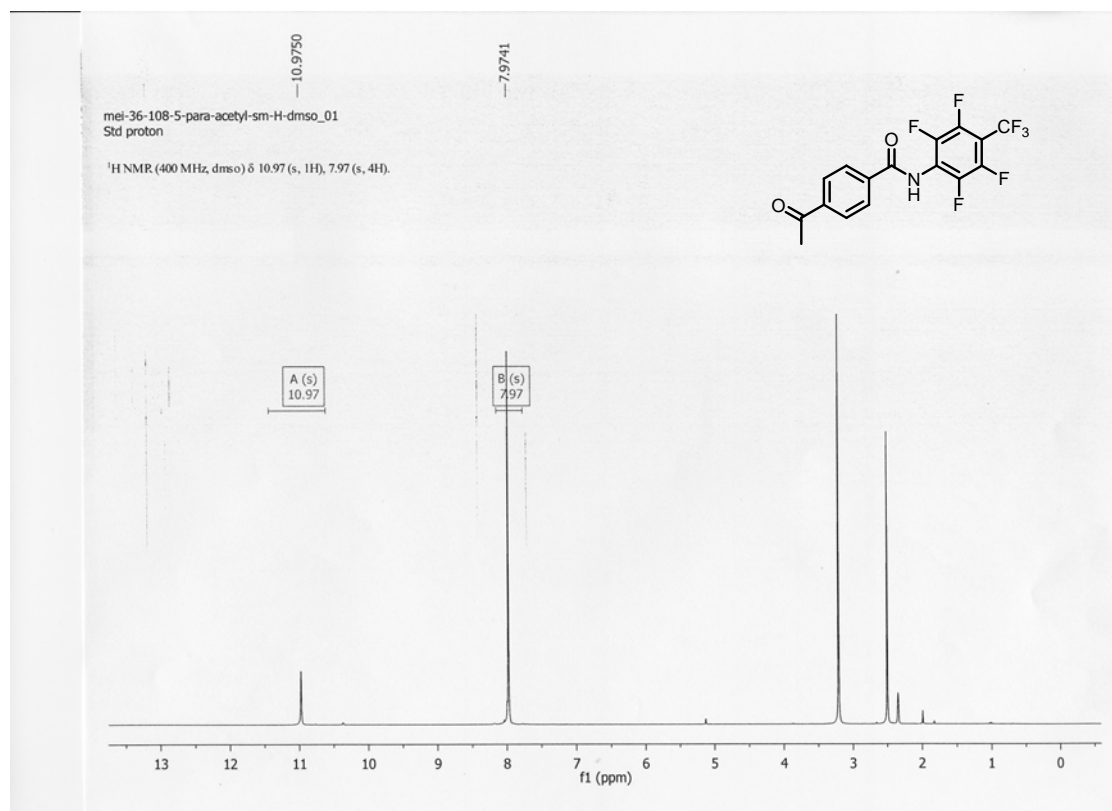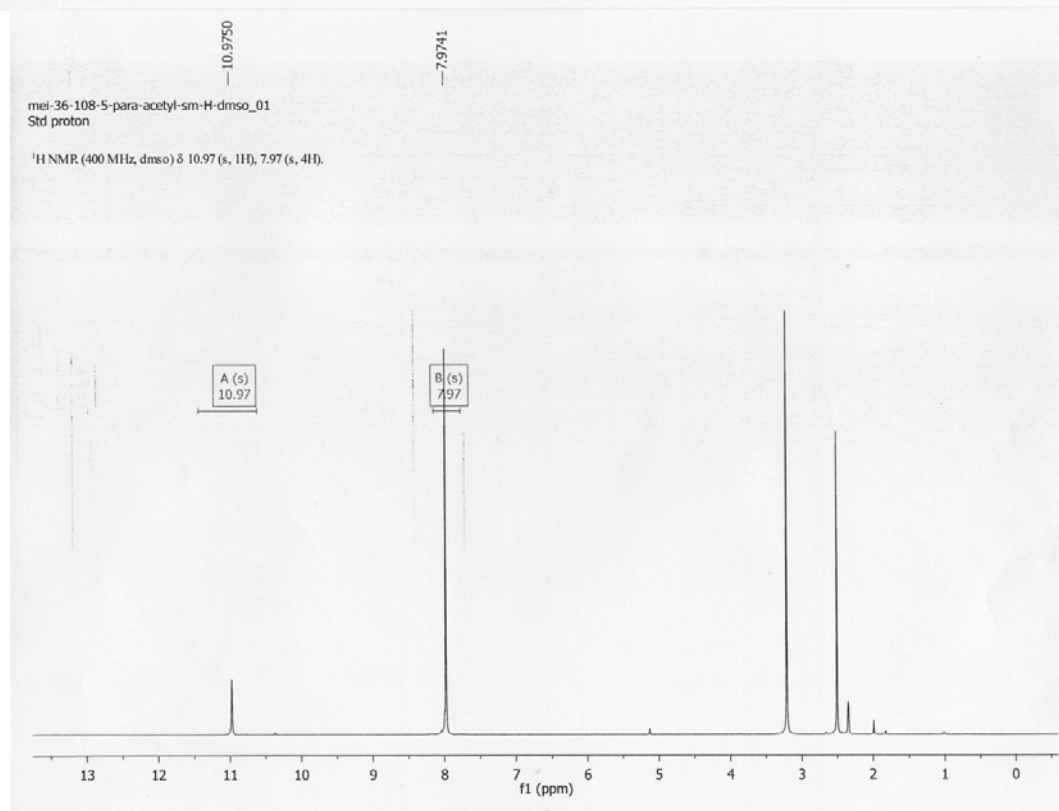



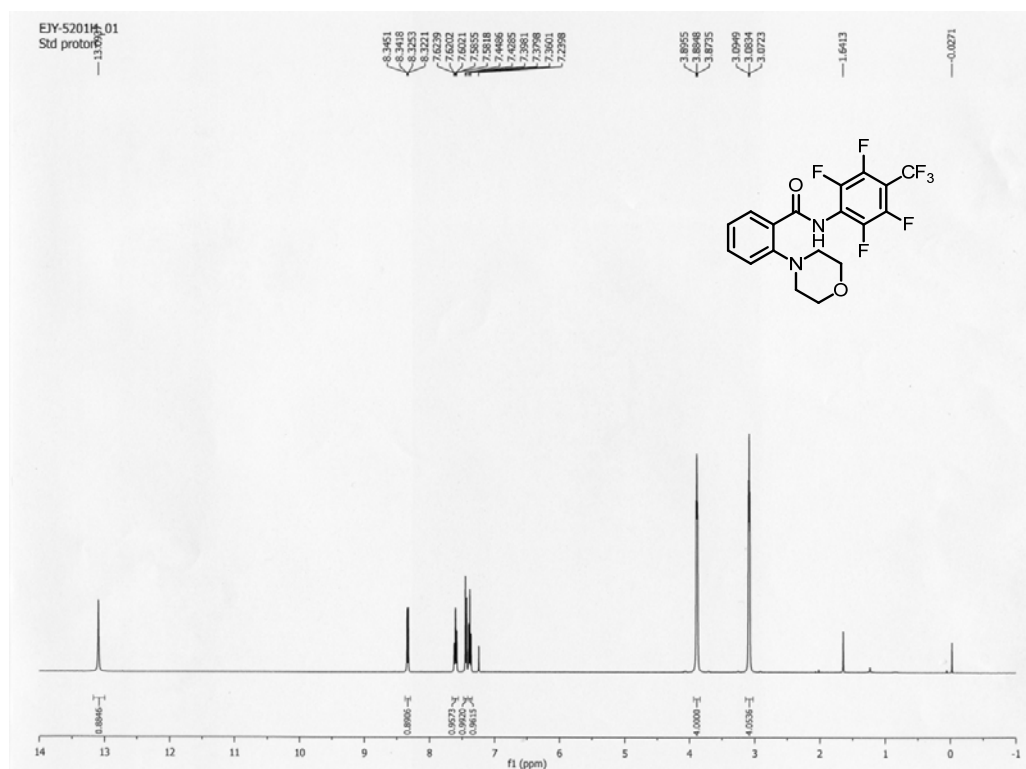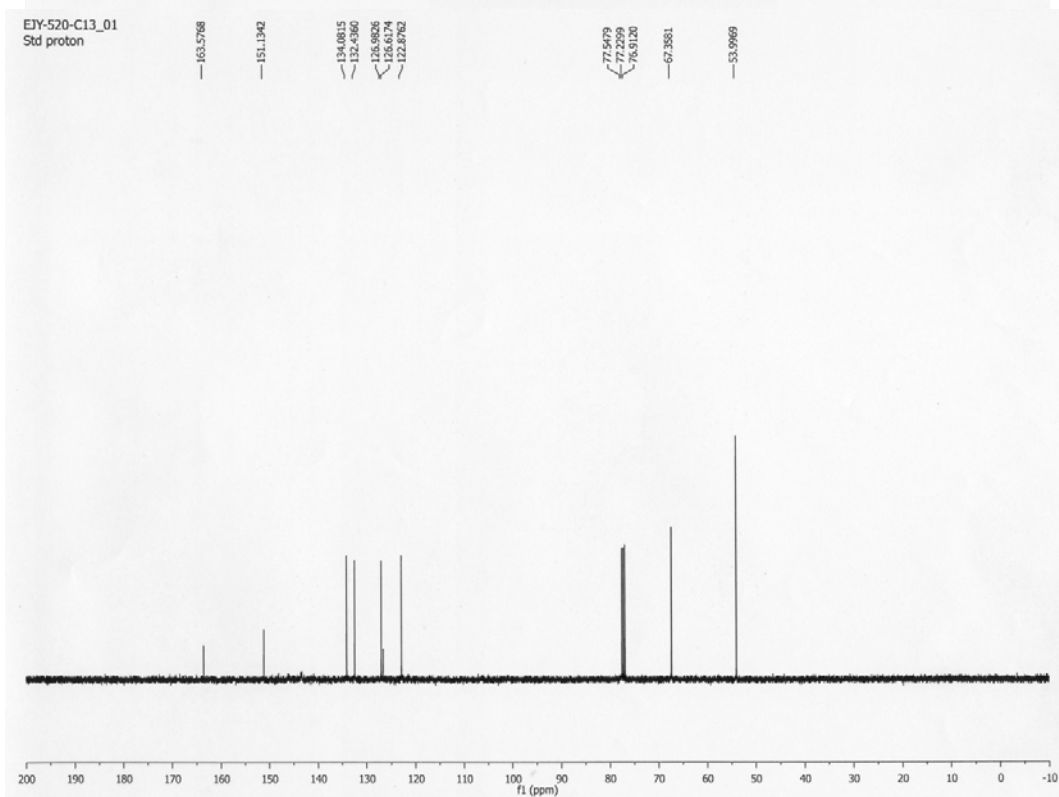



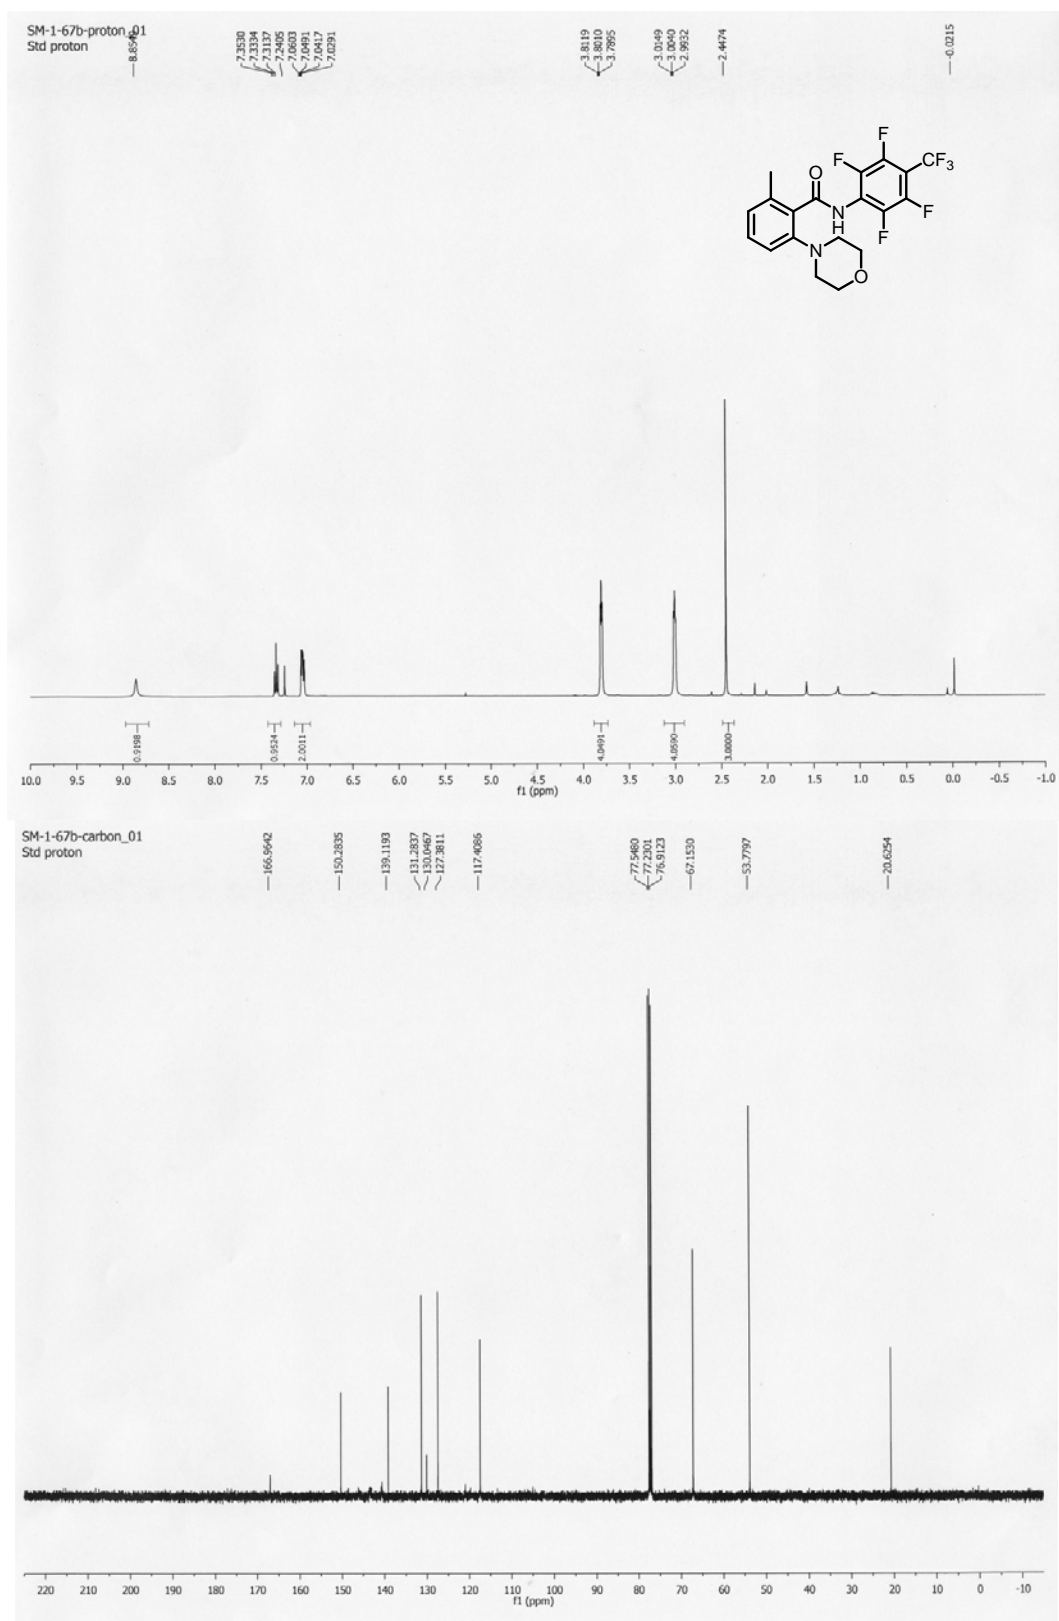



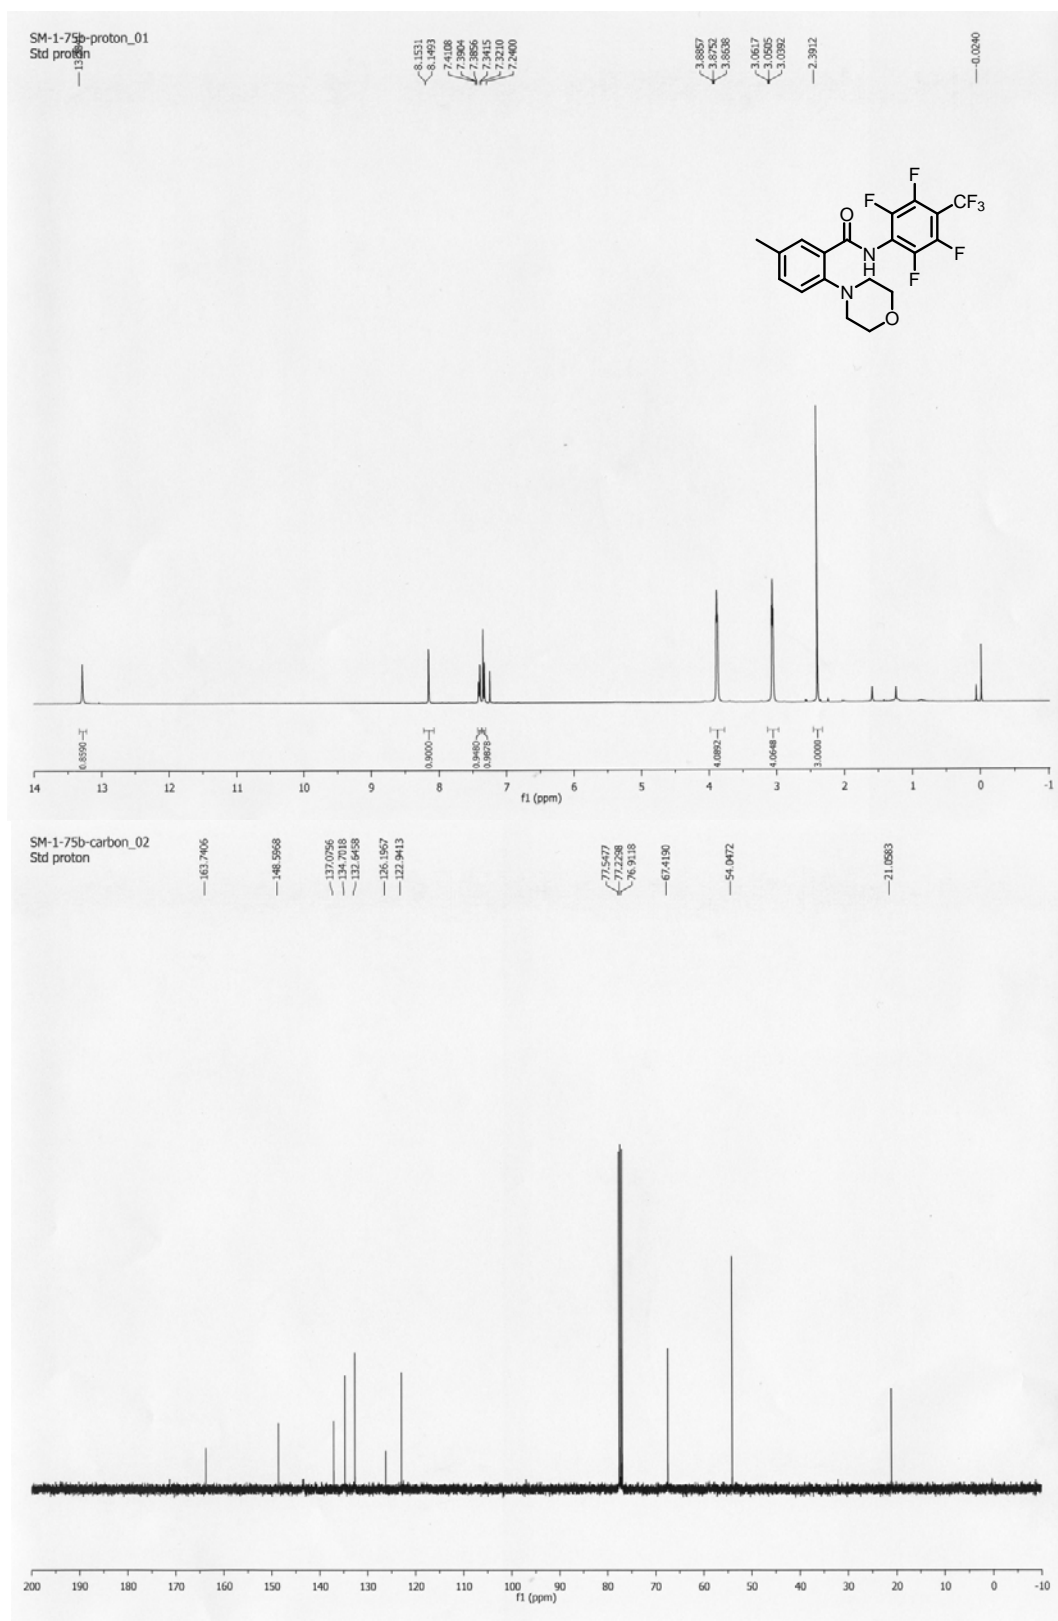

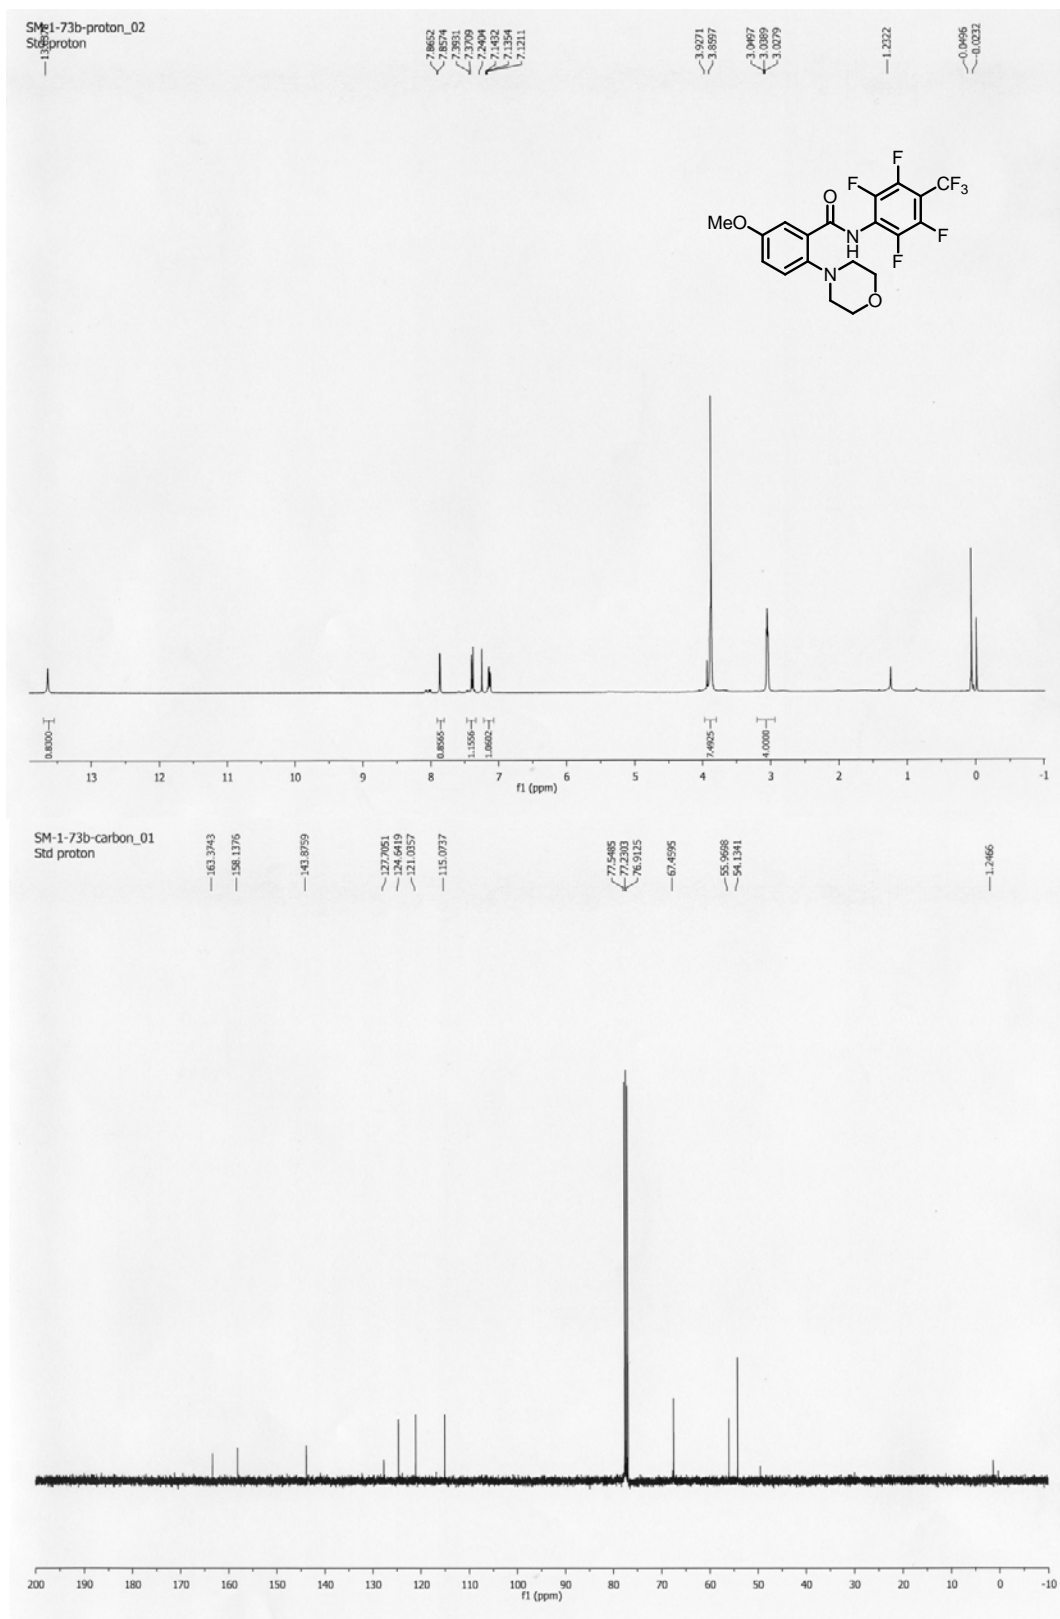

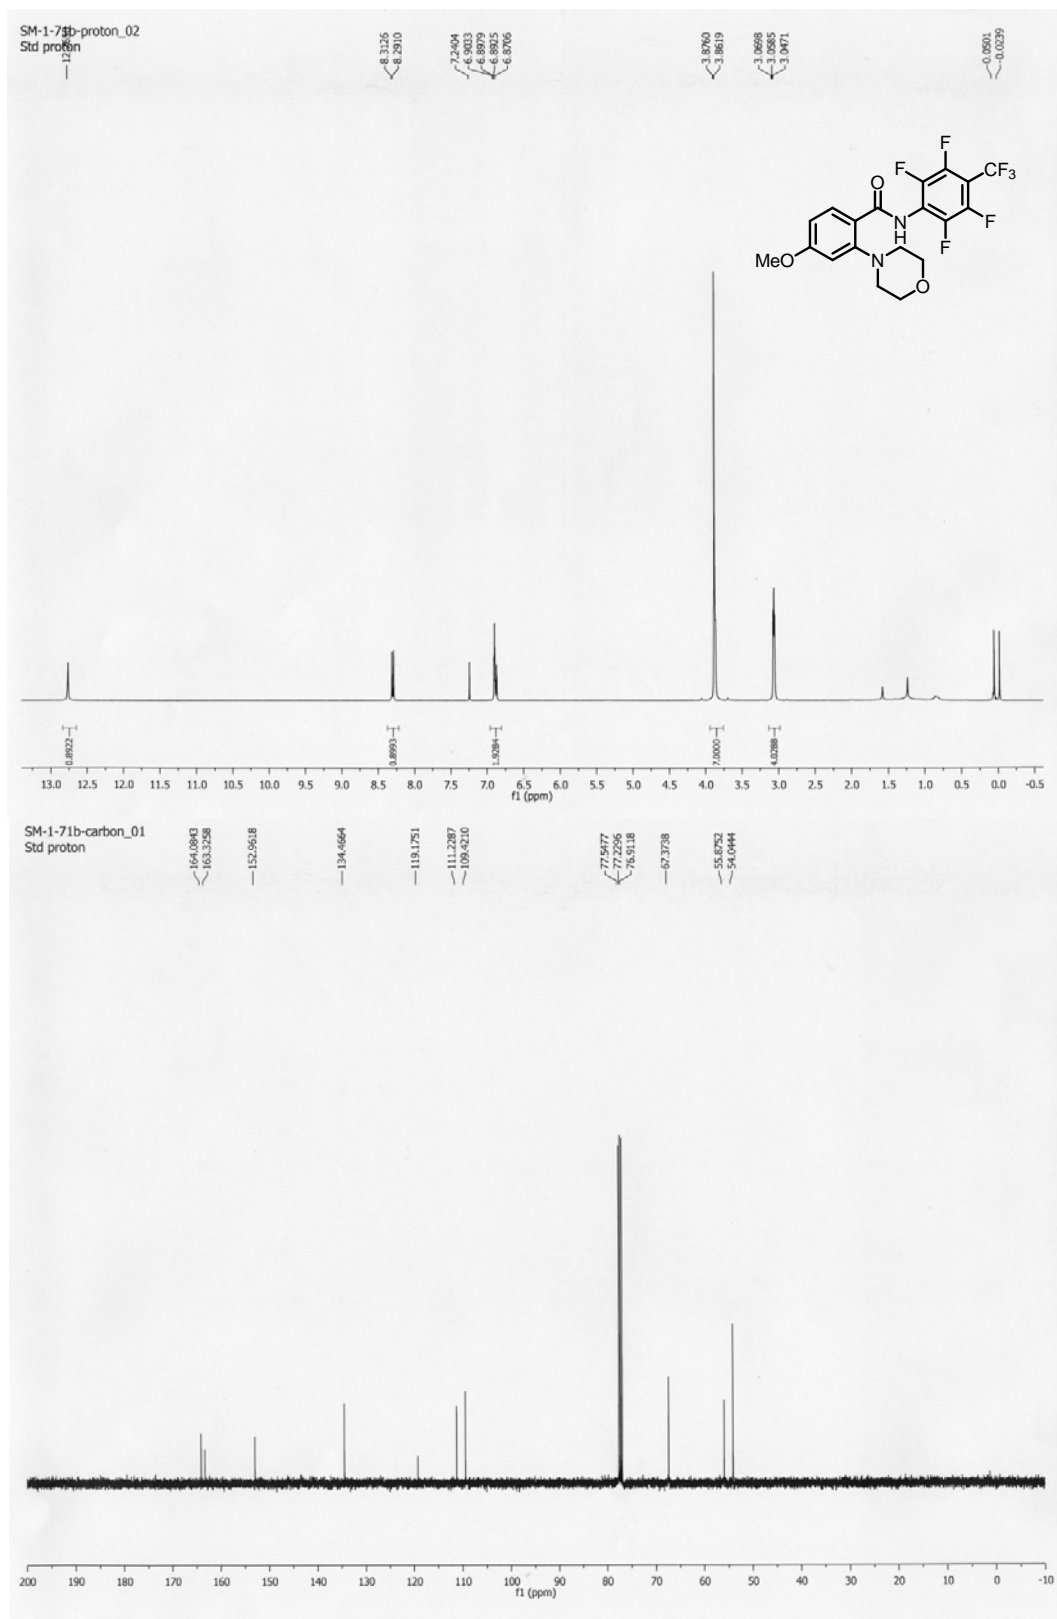

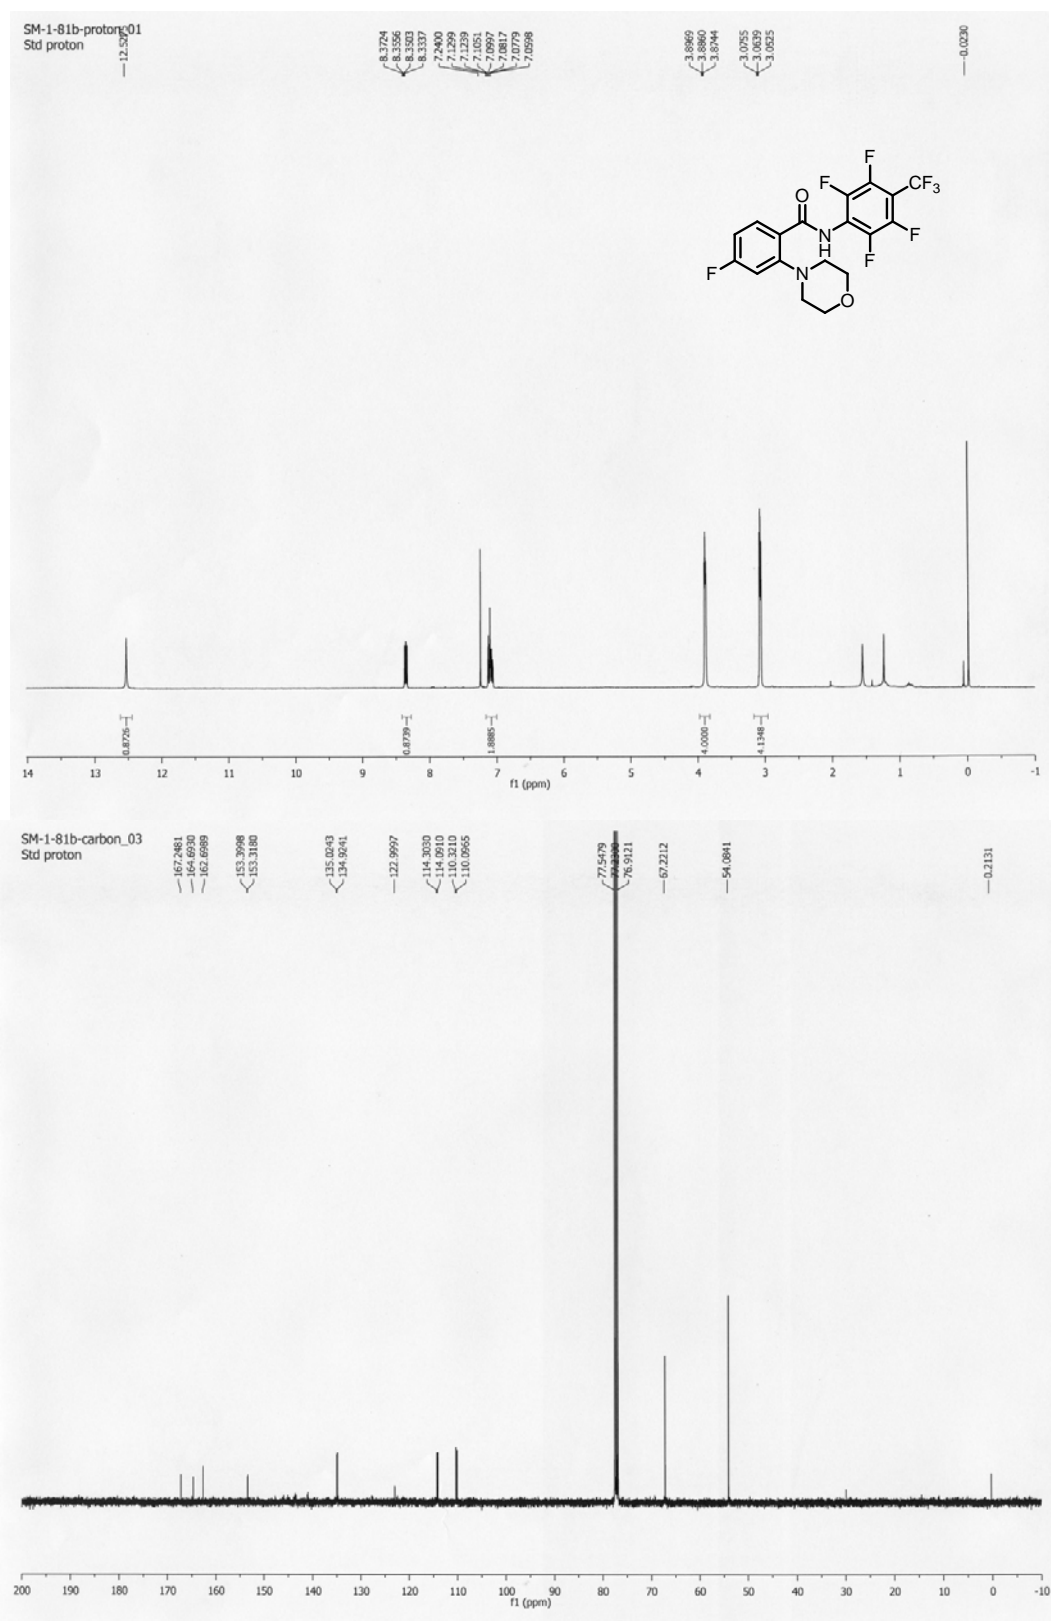

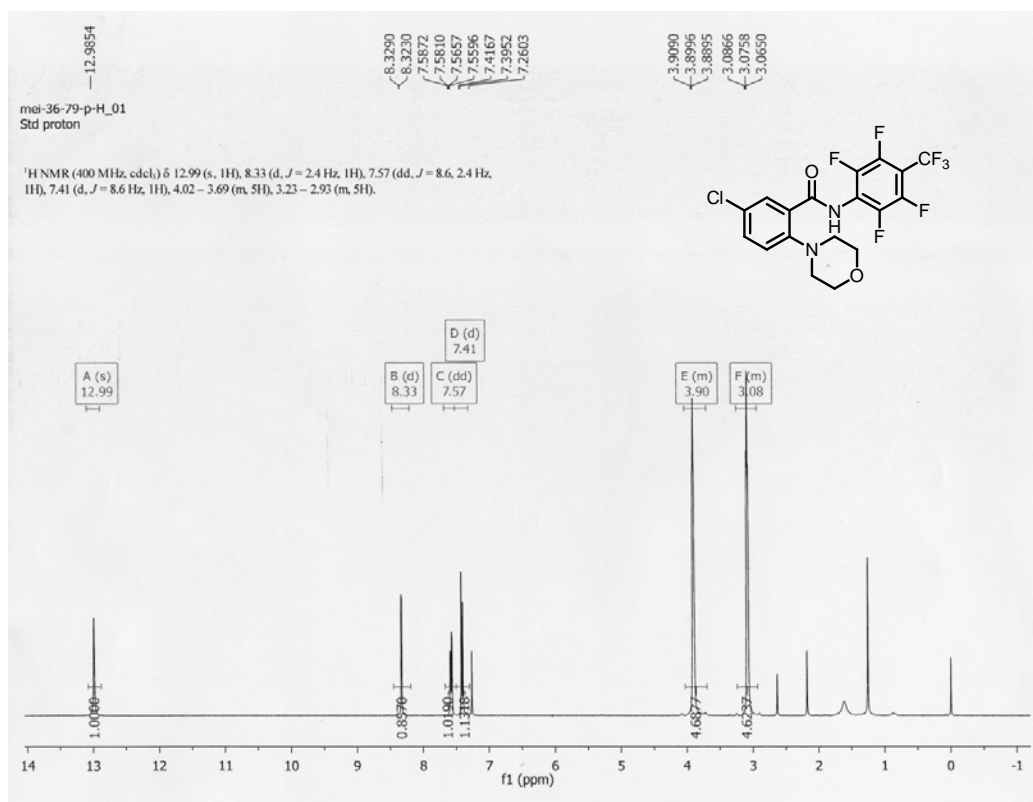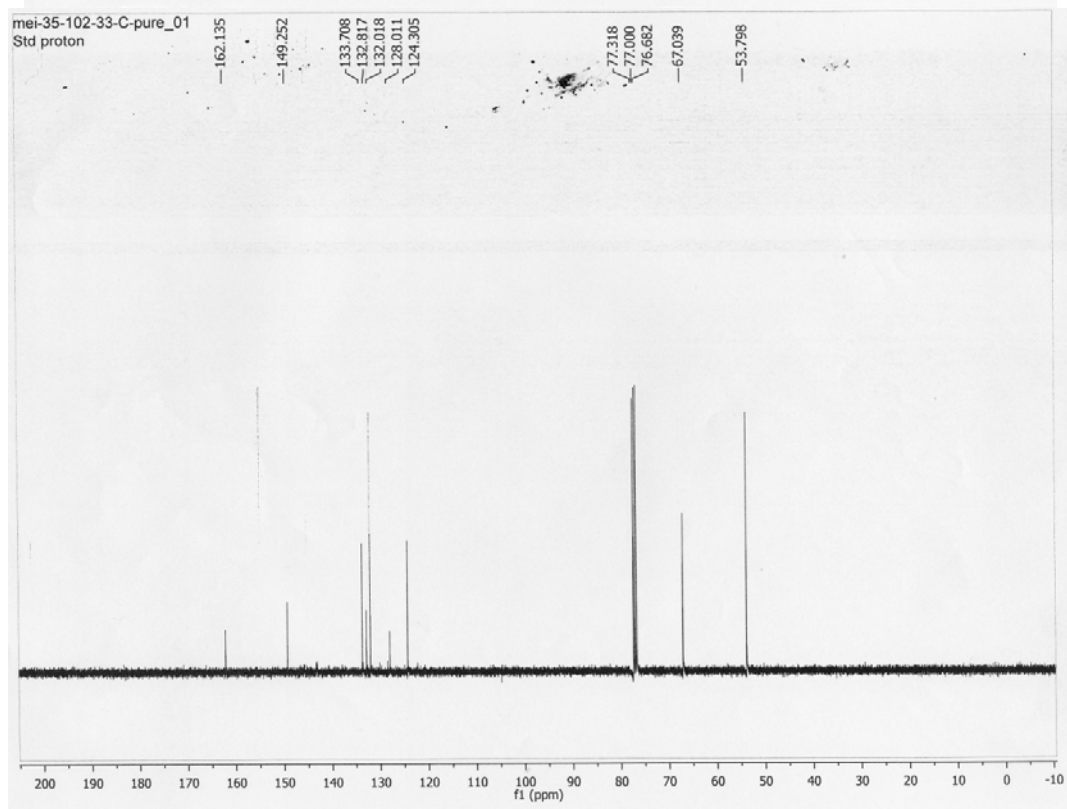

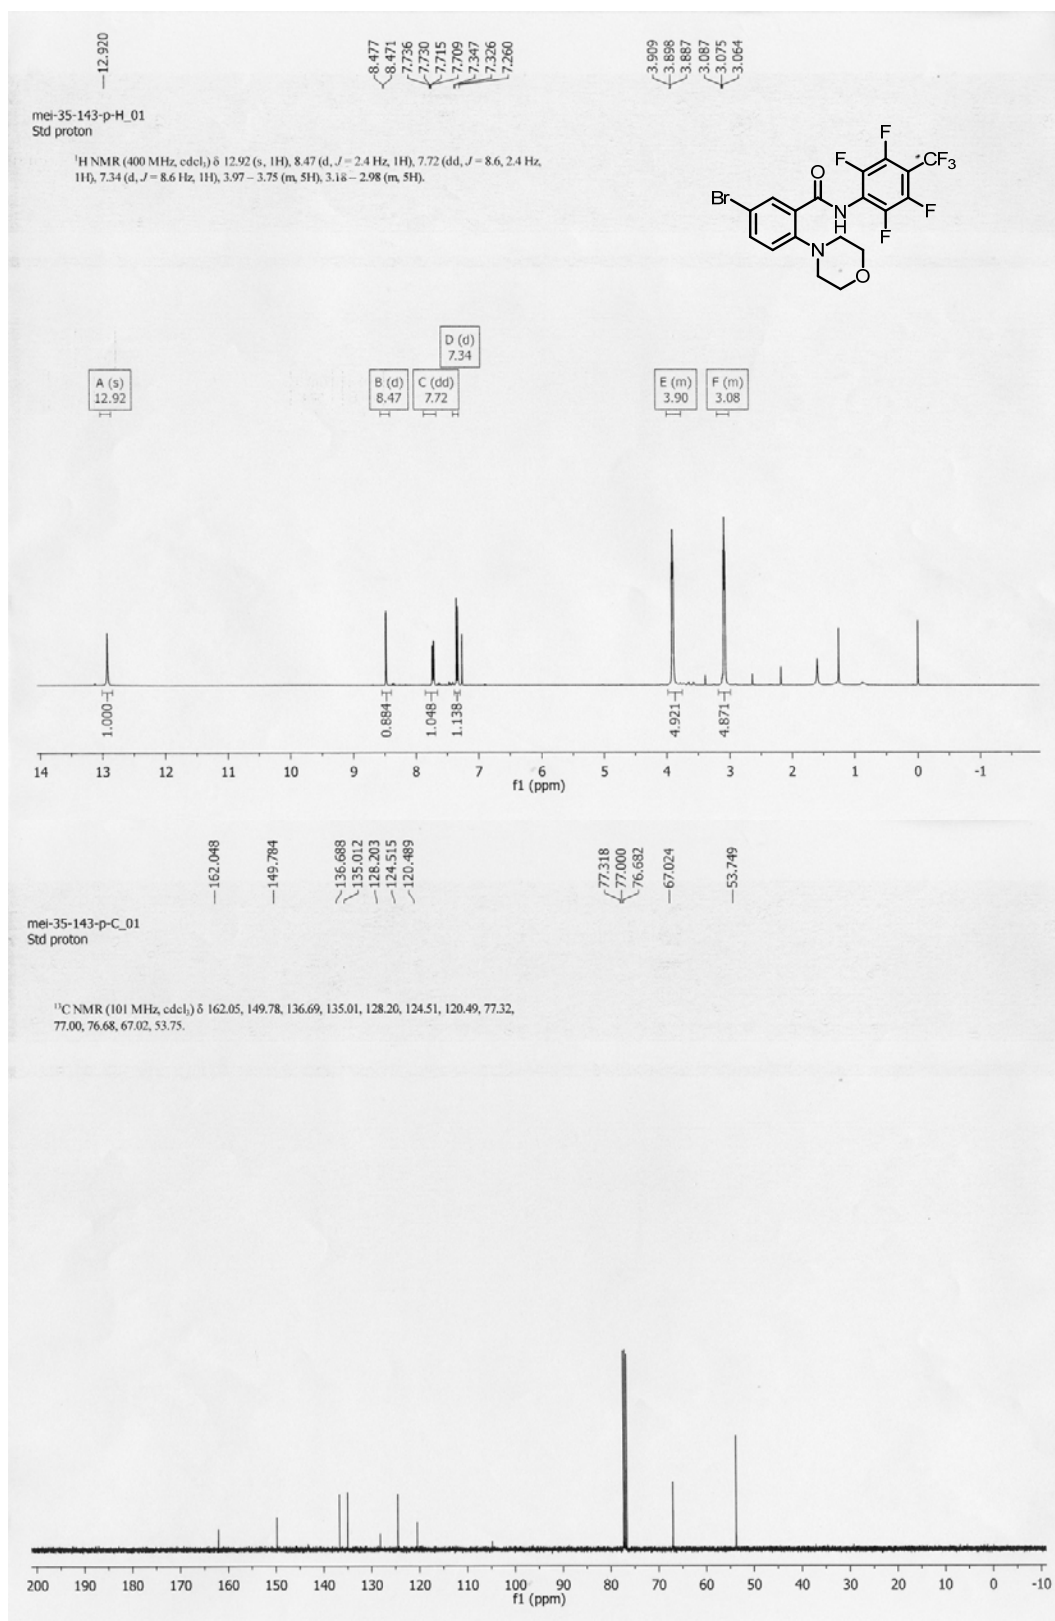

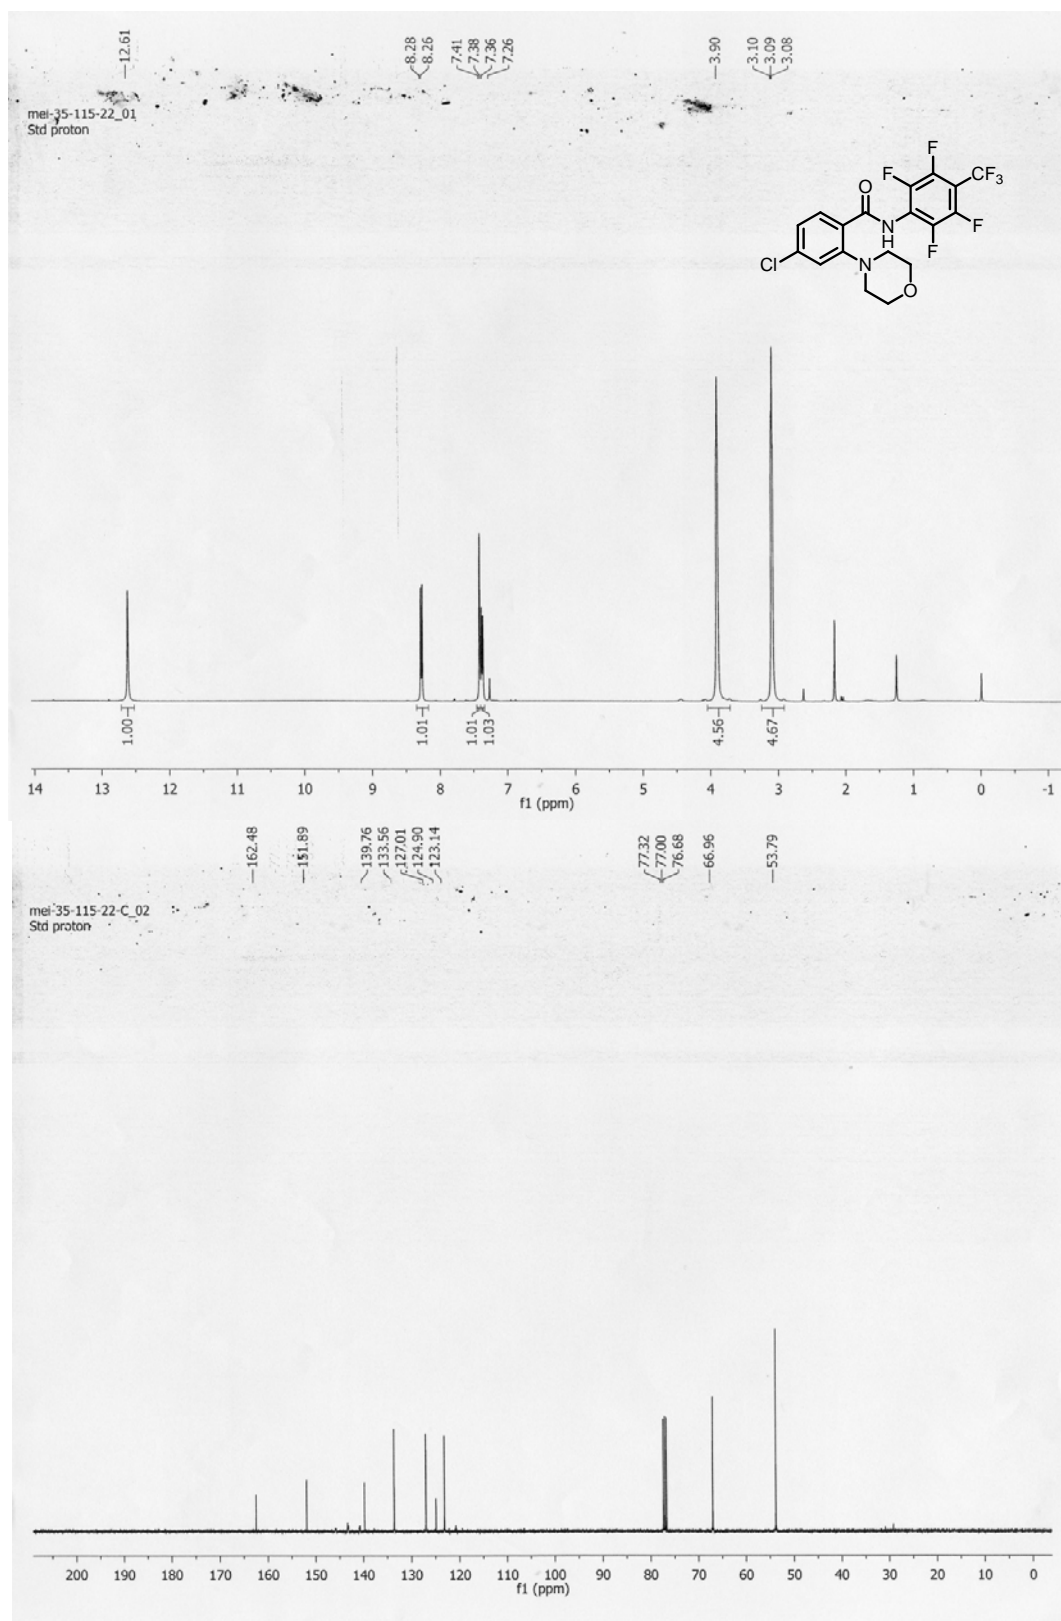

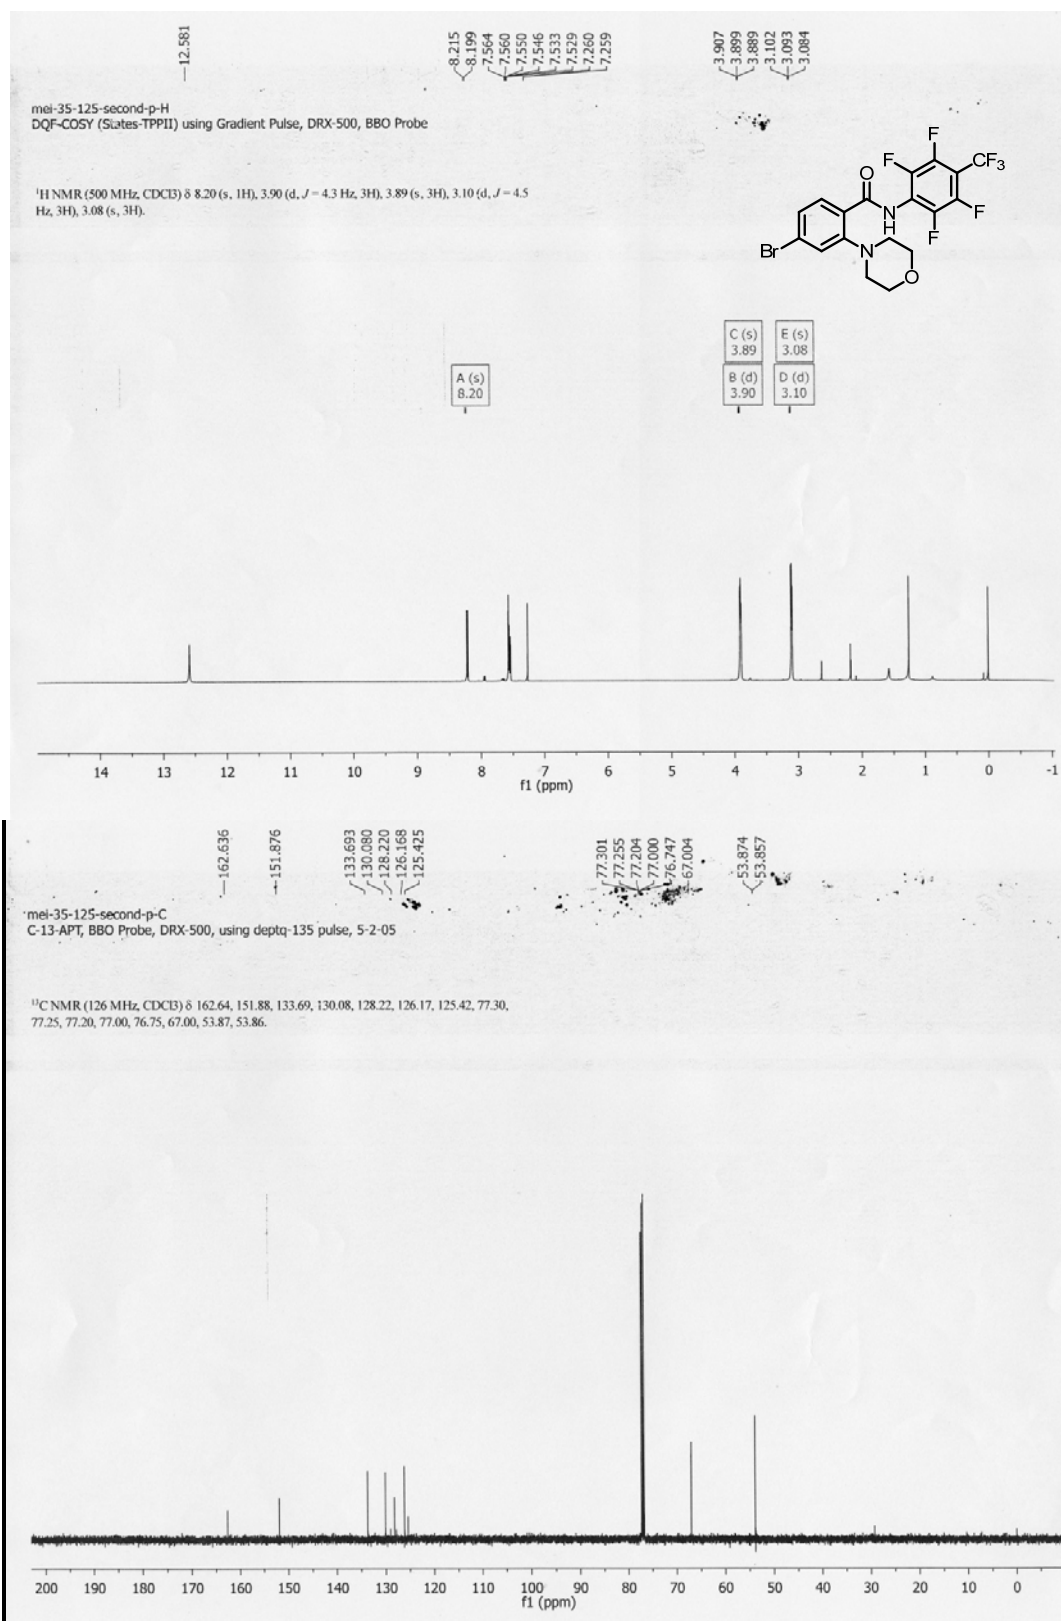



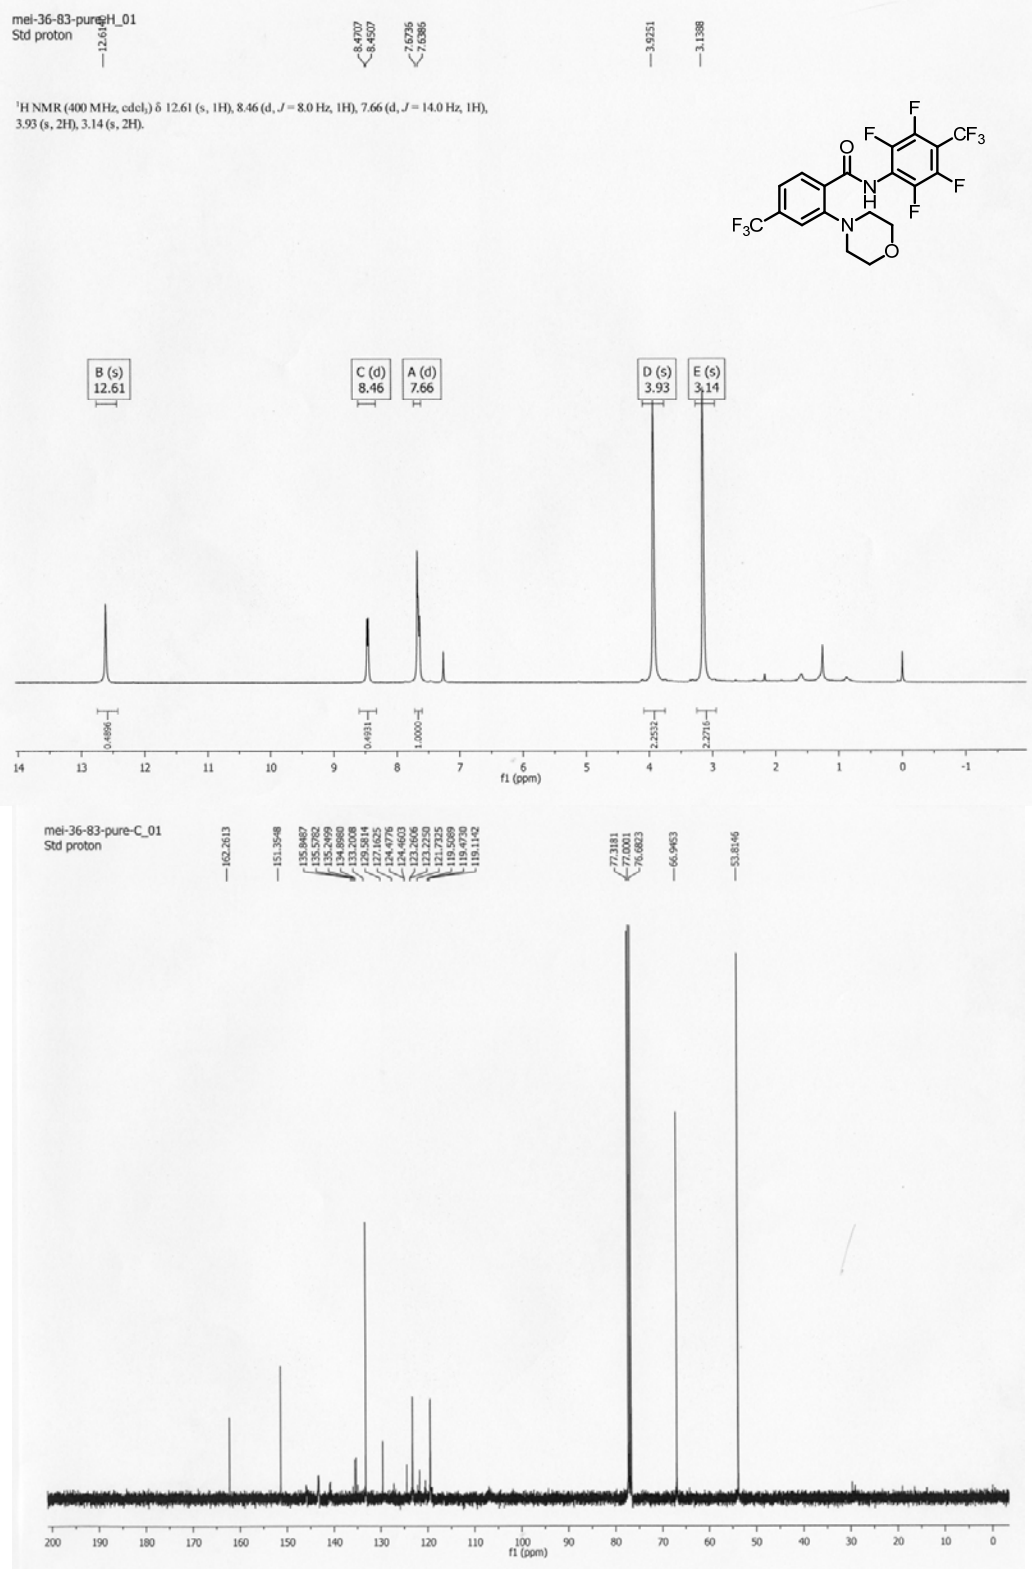

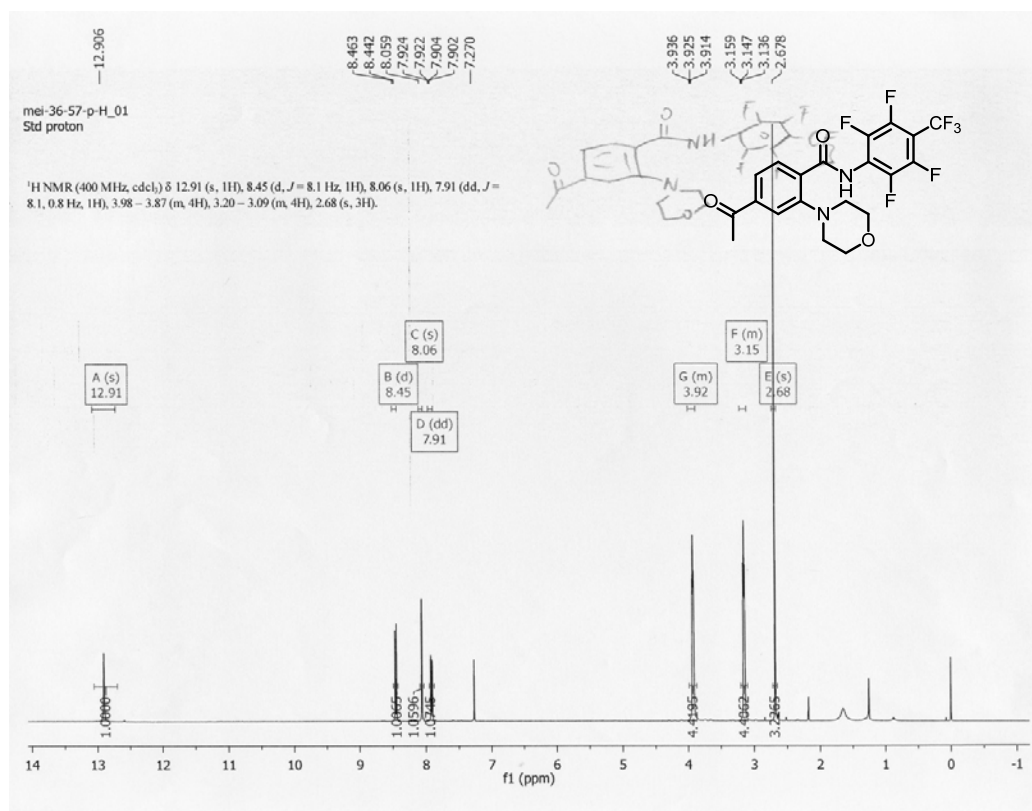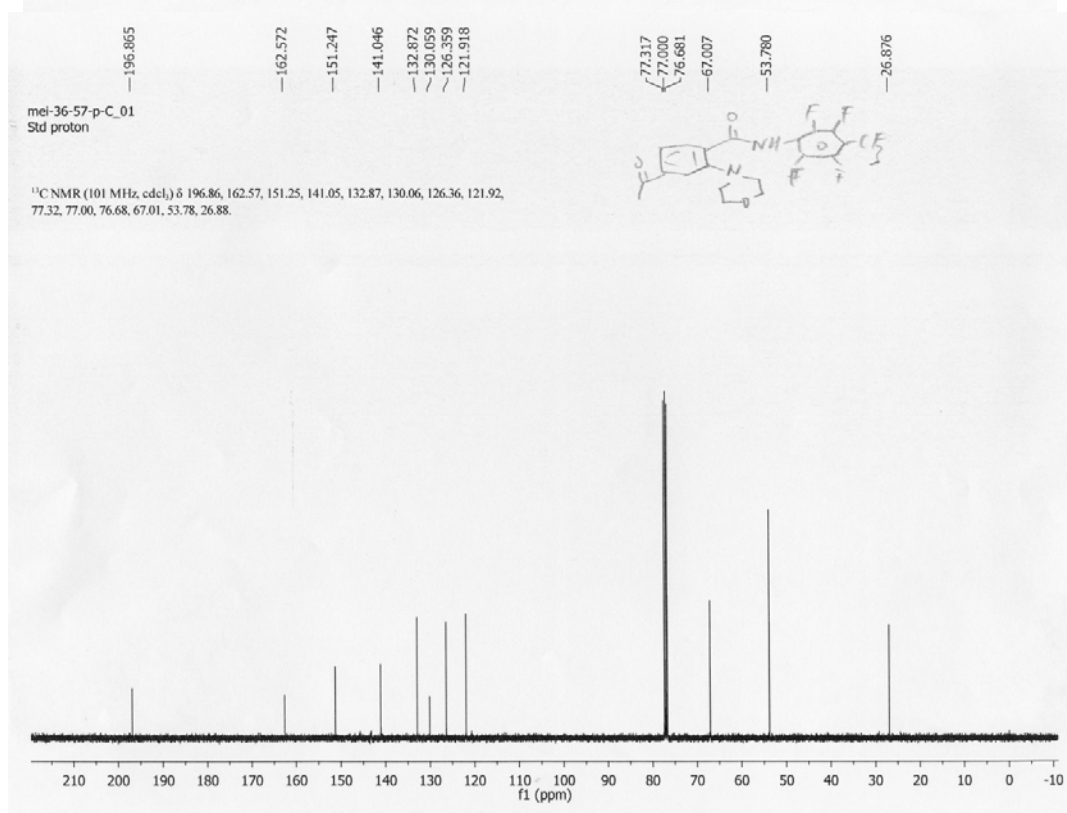

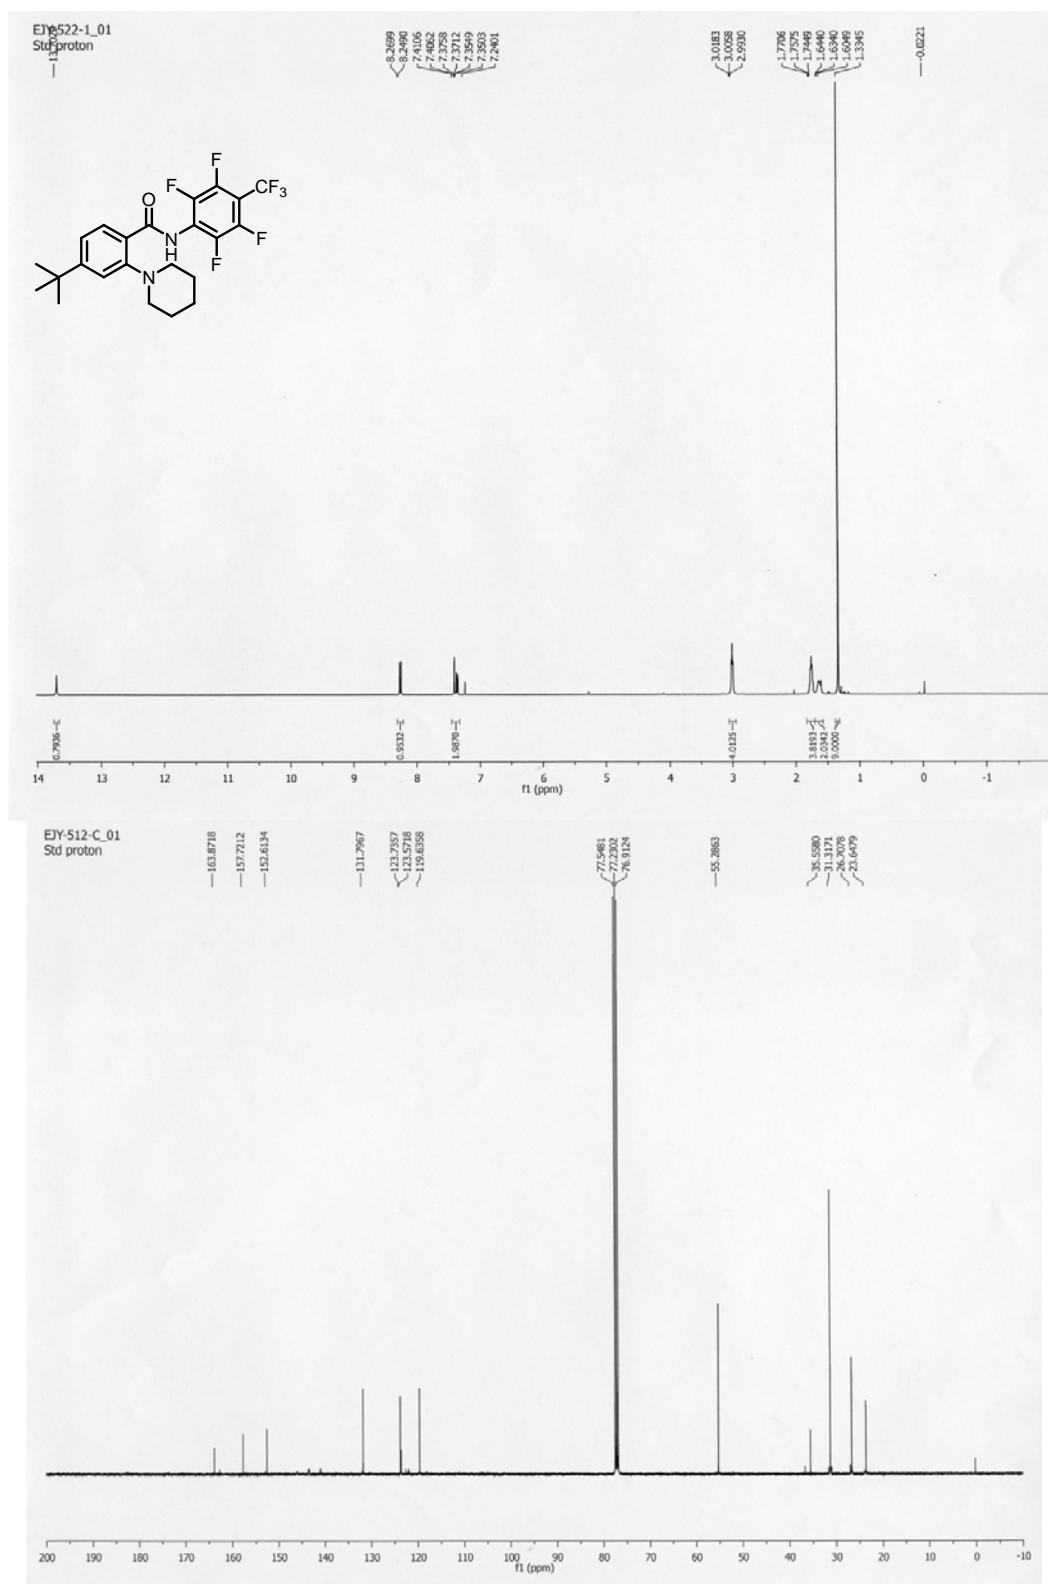

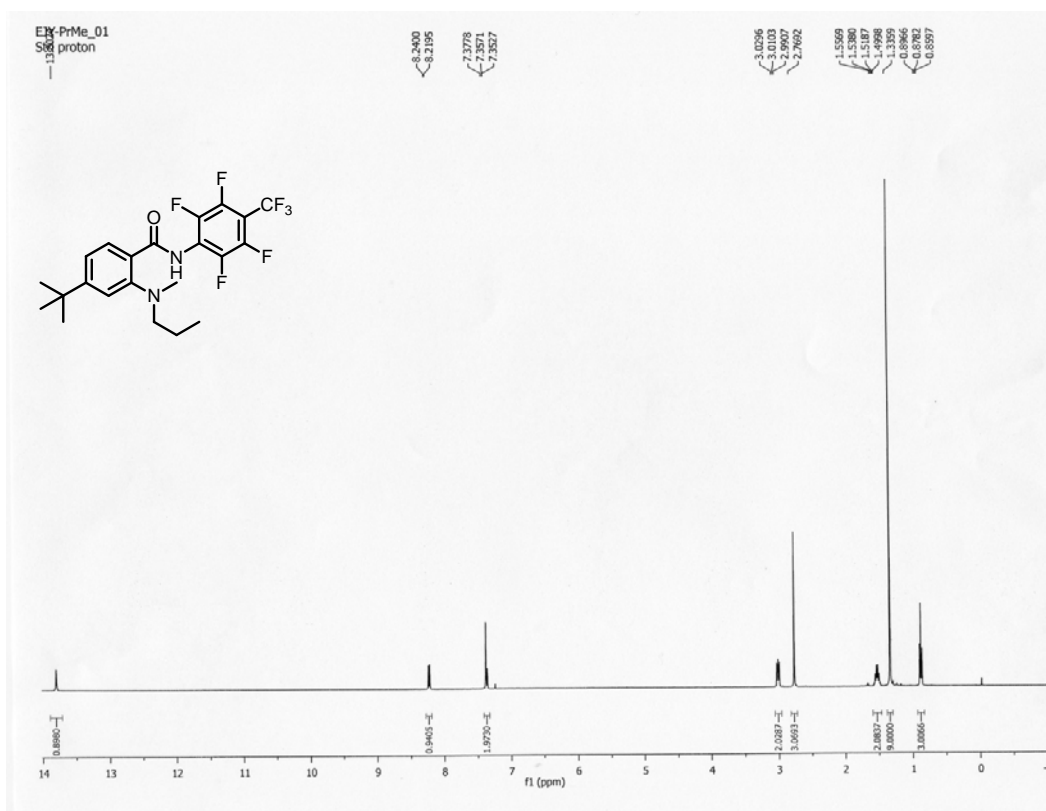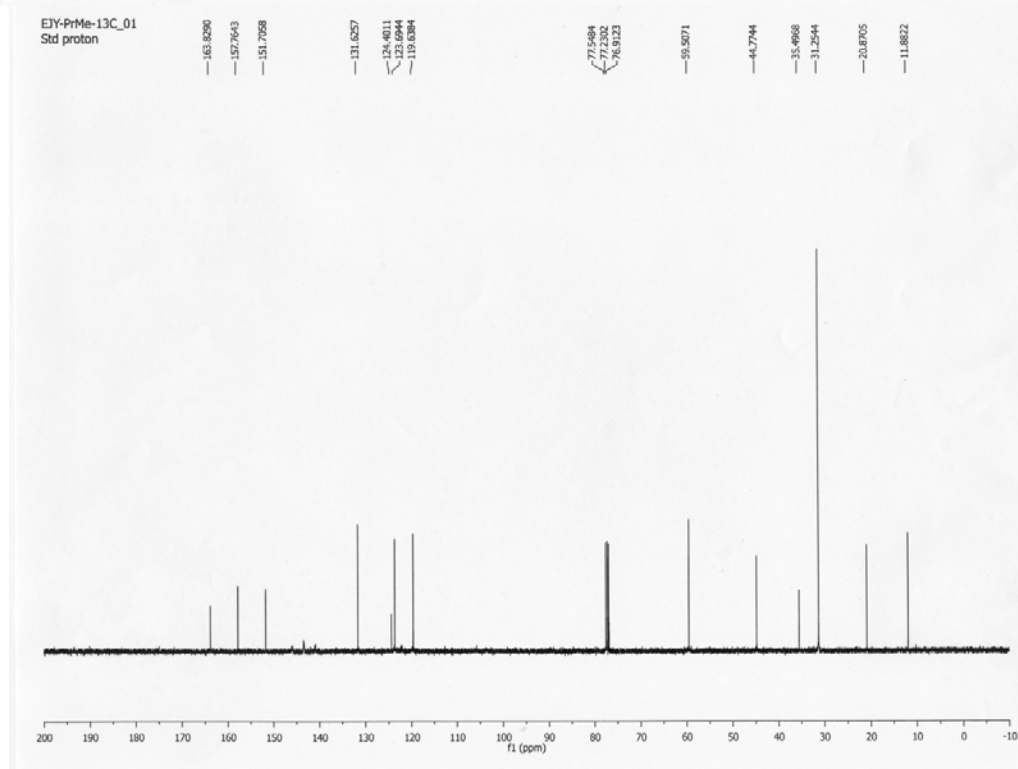

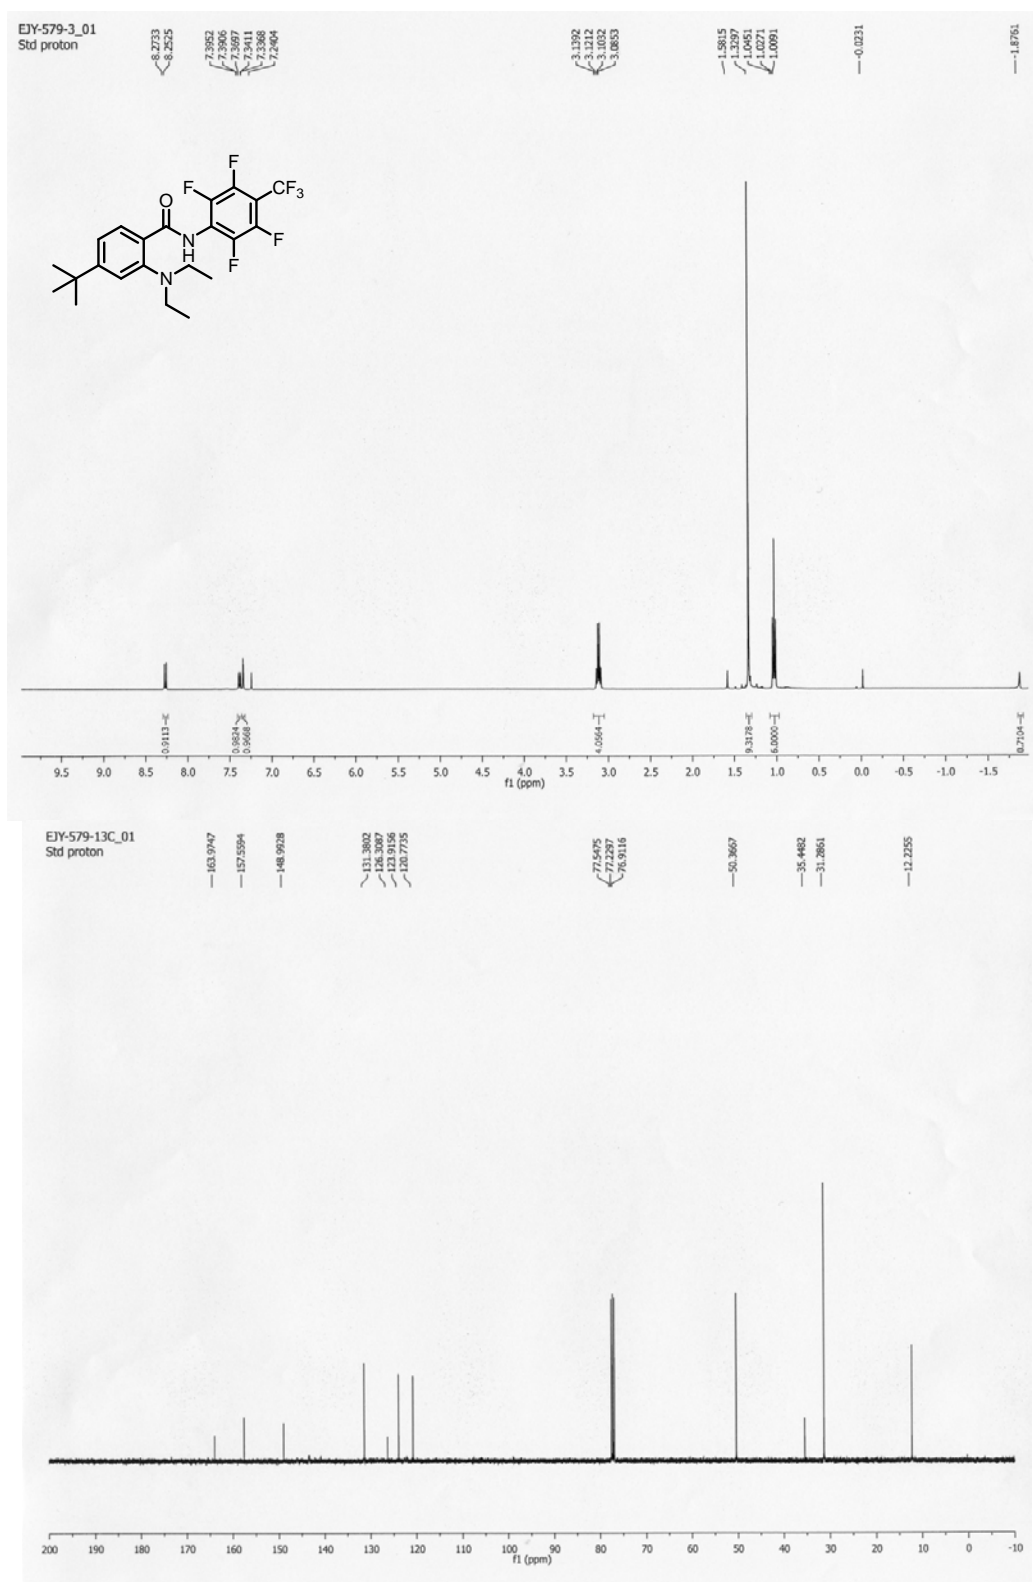

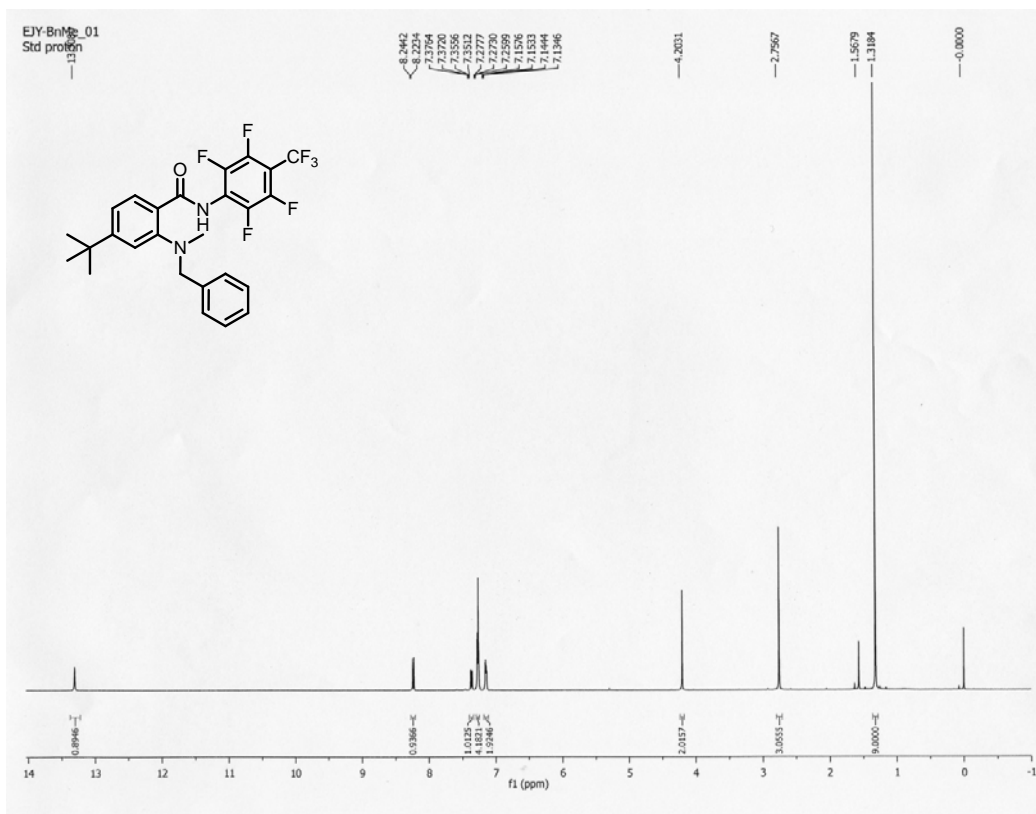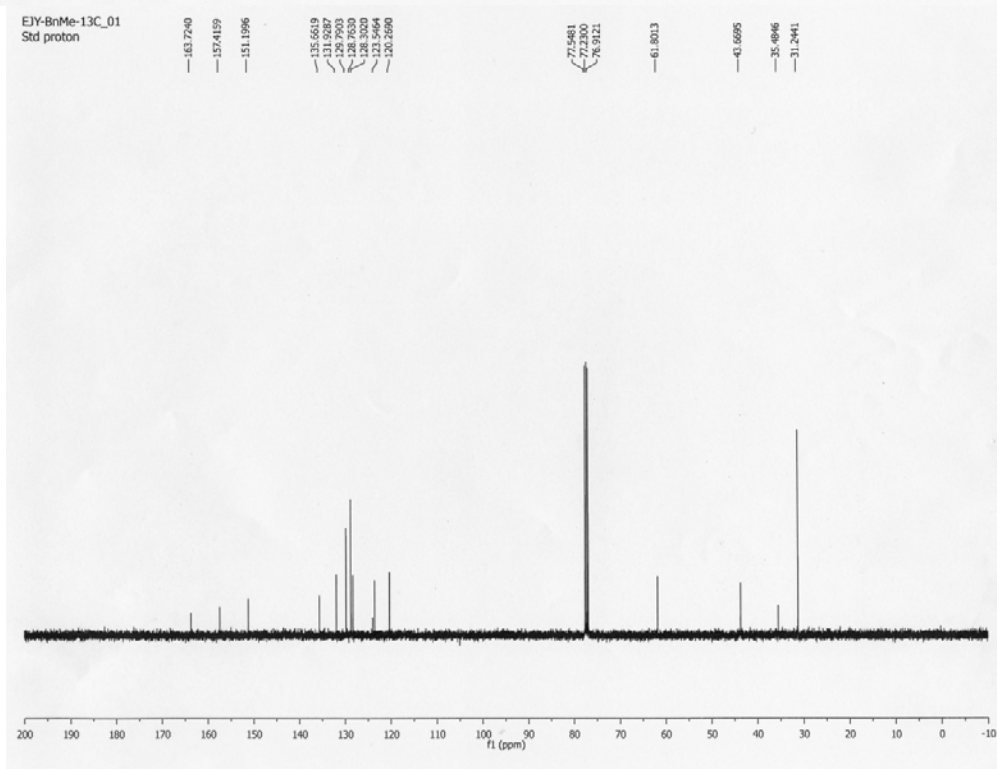

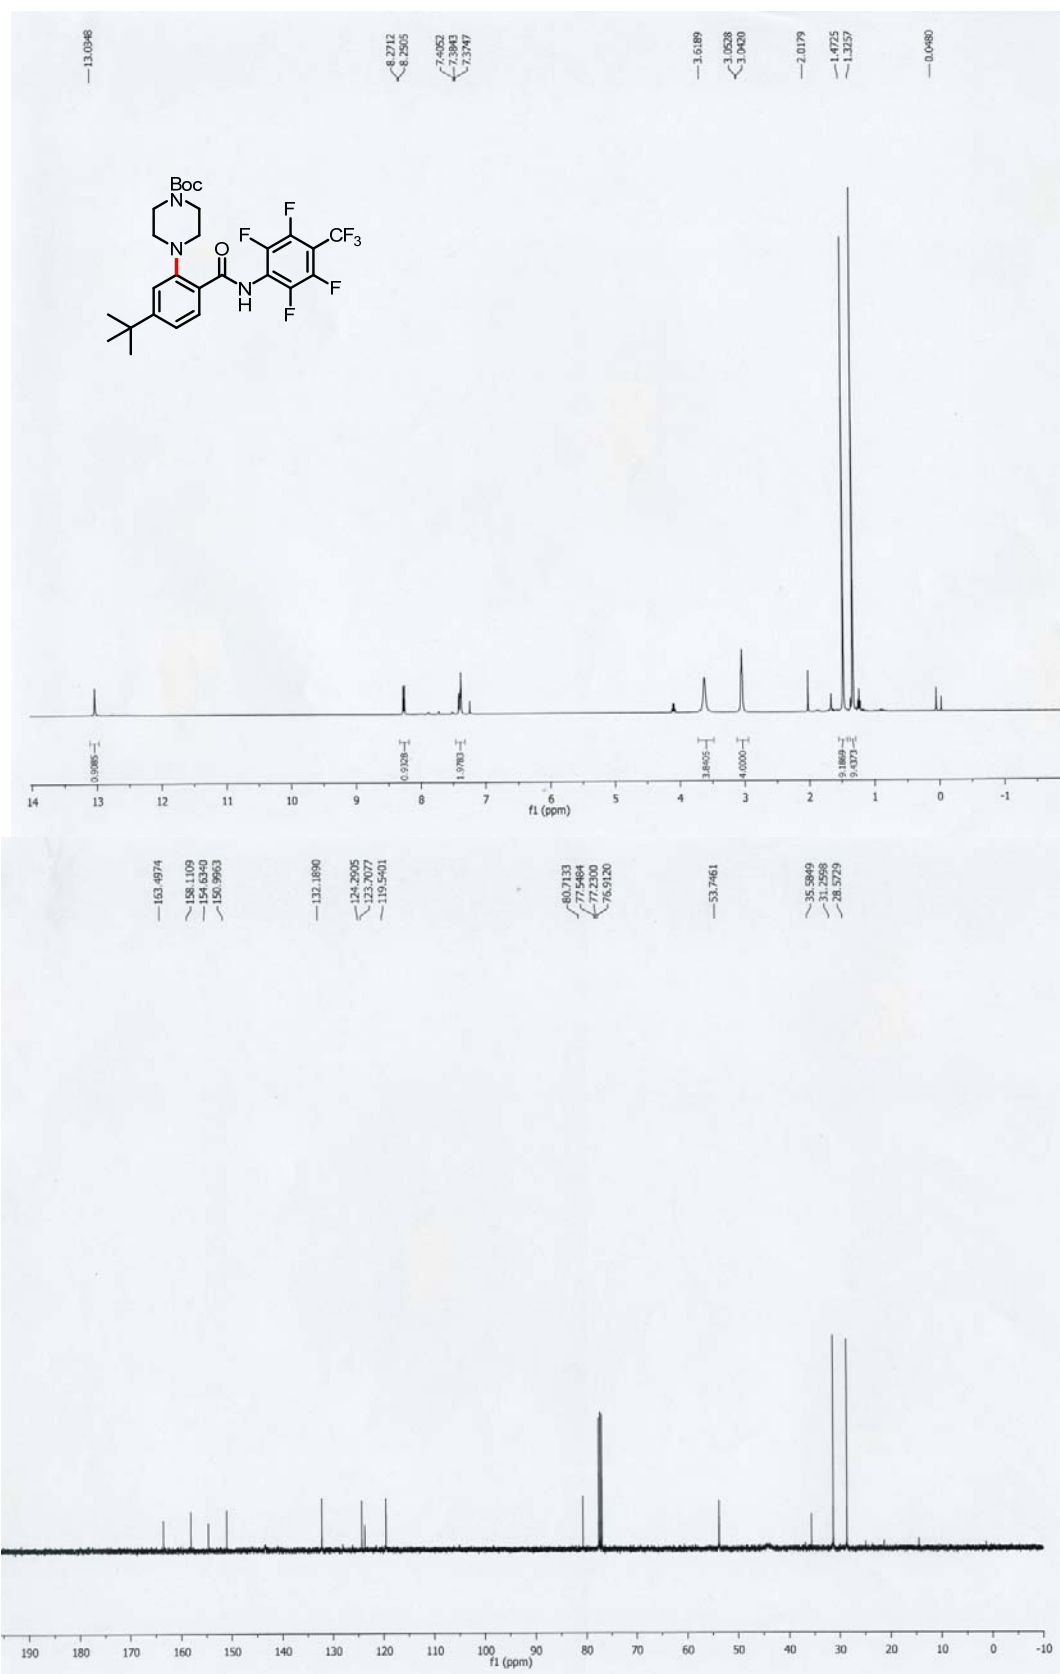

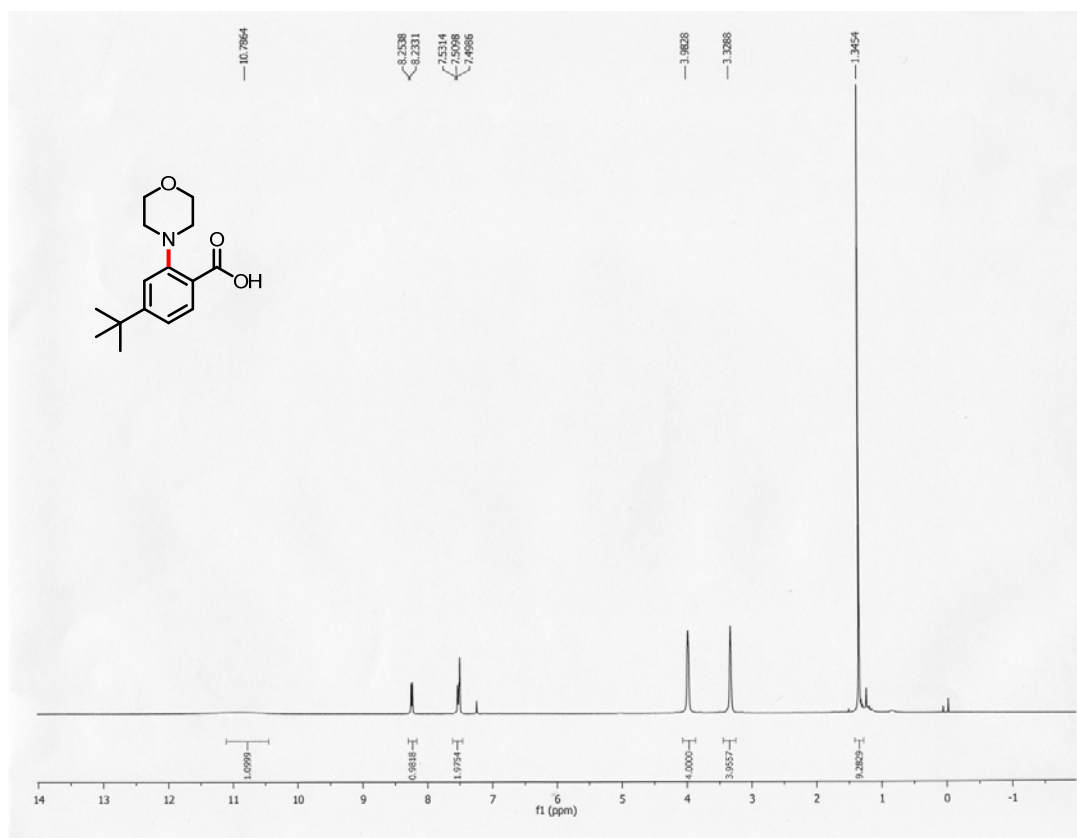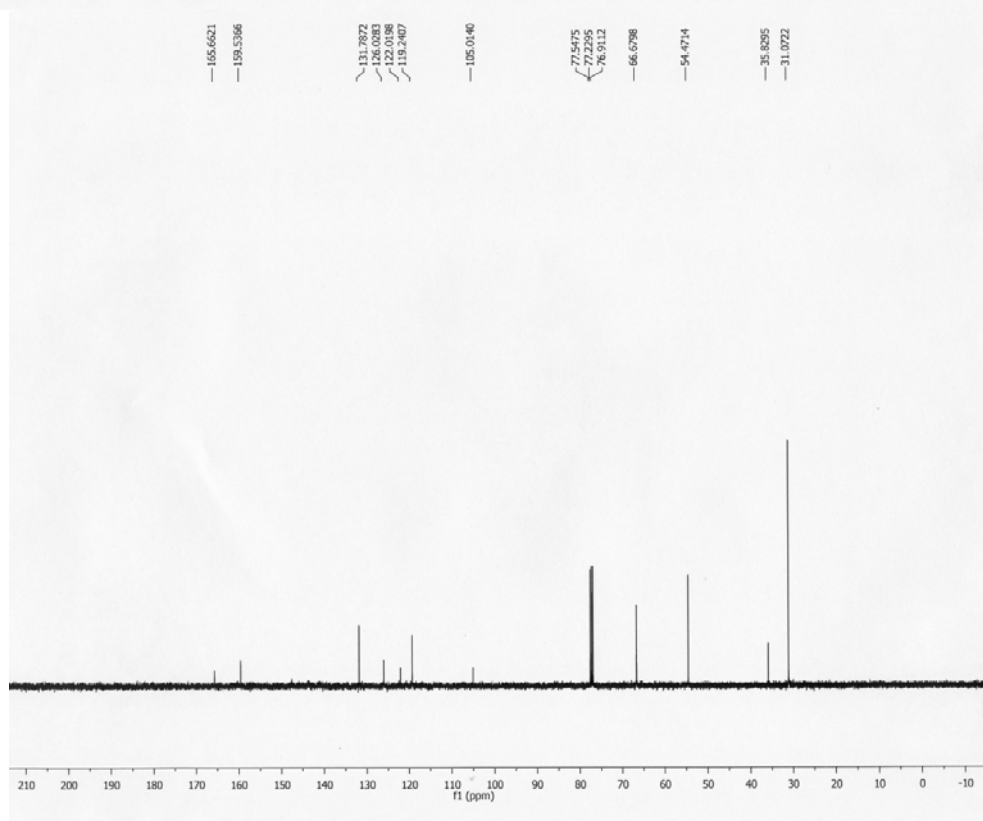

Supplement: Supplementary file 1 [file 4303177]
